# Supplementary material for: Phase separated ribosome nascent chain complexes paused in translation are capable to continue expression of proteins playing role in genotoxic stress response upon DNA damage
Source: bioRxiv preprint, doi:10.1101/2022.03.16.484567, version 1 (2022-03-16)
Supplement: Supplementary Table 2. [file 484567_file11.xlsx]

## Sheet: Complex_properties
Uniprot	Gene_name	Refseq	Gene_name_2	Length	hotloops_D_1_10	hotloops_D_1_25	hotloops_D_1_50	vsl2b_D_1_10	vsl2b_D_1_25	vsl2b_D_1_50	iupredS_D_1_10	iupredS_D_1_25	iupredS_D_1_50	iupredL_D_1_10	iupredL_D_1_25	iupredL_D_1_50	globplot_D_1_10	globplot_D_1_25	globplot_D_1_50	espritzXray_D_1_10	espritzXray_D_1_25	espritzXray_D_1_50	espritzNMR_D_1_10	espritzNMR_D_1_25	espritzNMR_D_1_50	Lys_1_10	Lys_1_25	Lys_1_50
P27476	NSR1	NP_011675.1	G7001	414	10	25	50	10	25	50	10	25	49	10	25	50	5	5	25	10	25	50	10	25	50	4	10	10
Q07623	NOP6	NP_010068.1	D1018	225	10	25	50	10	25	50	10	25	50	10	25	50	5	5	18	10	25	50	10	25	50	3	8	12
P53632	PAP2	NP_014526.1	HRC584 O0716	584	10	25	50	10	25	50	10	25	49	10	25	50	6	6	6	10	25	47	10	25	50	1	8	13
P39744	NOC2	NP_014849.3	YOX001	710	10	25	50	10	25	50	10	25	50	10	25	50	4	4	4	10	25	50	10	25	50	4	7	12
P23643	VPS3	NP_010783.3	D9719.1	1011	10	25	50	10	25	50	10	25	50	10	25	50	4	9	20	10	25	50	10	25	50	4	7	10
Q04373	PUF6	NP_010784.1	D9719.2	656	10	25	50	10	25	50	10	25	50	10	25	50	6	6	9	10	25	50	10	25	50	3	7	10
P05747	RPL29	NP_116690.3	YFR032BW	59	10	25	36	10	25	50	10	25	50	10	25	50	3	5	17	10	25	46	10	25	37	2	6	10
P40010	NUG1	NP_010921.1		520	10	25	50	10	25	50	10	25	49	10	25	50	1	1	10	10	25	50	10	25	50	1	6	14
P38903	RTS1	NP_014657.1	OR26.04	757	10	25	50	10	25	50	10	25	50	10	25	50	1	12	28	10	25	50	10	25	50	2	6	12
P53628	SNF12	NP_014420.1	N3224	566	10	25	46	10	25	50	10	25	50	10	25	50	6	17	32	10	25	39	10	25	50	3	6	10
P53927	NOP15	NP_014289.1	N1954	220	10	25	45	10	25	50	10	25	50	10	25	50	7	7	11	10	25	50	10	25	50	3	5	7
Q06506	RRP9	NP_015463.1		573	10	25	46	10	25	50	10	25	50	10	25	50	3	15	21	10	25	50	10	25	50	3	5	5
P0CX40	RPS8B	NP_009481.1;NP_011028.1		200	10	25	50	10	25	50	10	25	46	10	25	50	4	4	4	10	25	31	10	17	30	1	5	7
Q05942	RSA3	NP_013322.1		220	10	25	44	10	25	50	10	25	50	10	25	50	6	6	21	10	25	50	10	25	50	0	5	6
P0CX39	RPS8A	NP_009481.1;NP_011028.1	YBL06.05 YBL0613	200	10	25	50	10	25	50	10	25	46	10	25	50	4	4	4	10	25	31	10	17	30	1	5	7
P53254	UTP22	NP_011604.3		1237	10	25	50	10	25	50	10	25	50	10	25	50	4	4	19	10	25	50	10	25	50	2	5	6
P48412	UPF3	NP_011586.1		387	10	25	50	10	25	50	10	25	50	10	25	50	5	20	45	10	25	50	10	25	50	1	5	10
P40019	CHZ1	NP_010947.2		153	10	25	50	10	25	50	10	25	50	10	25	50	2	7	7	10	25	50	10	25	50	2	5	9
Q04217	ECM16	NP_013847.1	YM9553.04	1267	10	25	50	10	25	50	10	25	50	10	25	50	3	3	15	10	25	50	10	15	39	2	5	6
P53289	RTS3	NP_011677.3		263	10	25	50	10	25	50	10	25	50	10	25	50	3	3	10	10	25	50	10	25	50	0	5	5
Q04660	ERB1	NP_013764.1	YM9796.02C	807	10	25	47	10	25	50	10	25	50	10	25	50	4	4	4	10	25	50	10	25	50	2	5	6
Q01448	HPC2	NP_009774.4	YBR1503	625	10	25	50	10	25	50	10	25	48	10	25	50	4	16	26	10	25	50	10	25	49	1	5	7
Q03834	MSH6	NP_010382.3	YD8557.04C	1242	10	25	40	10	25	50	10	25	50	10	25	50	5	12	27	10	25	50	10	25	50	2	5	9
P11978	SIR4	NP_010513.1	YD9934.12	1358	10	25	49	10	25	50	10	25	47	10	25	50	7	22	24	10	25	50	10	25	50	1	5	10
P41812	POP1	NP_014178.1	N1285	875	10	25	50	10	25	50	10	23	38	10	25	50	8	10	19	10	25	50	10	21	46	0	4	5
Q07896	NOC3	NP_013102.1		663	10	25	46	10	25	50	10	25	50	10	25	50	2	2	2	10	25	50	10	25	50	1	4	5
P13259	PCT1	NP_011718.1	G7729	424	10	25	50	10	25	50	10	25	50	10	25	50	8	8	16	10	25	50	10	25	50	1	4	8
P38852	LIN1	NP_012026.1		340	10	25	50	10	25	50	10	25	50	10	25	50	6	10	13	10	25	50	10	25	50	2	4	4
P38321		NP_009784.1	YBR1522	900	10	25	50	10	25	50	10	23	48	10	25	50	4	14	14	10	25	50	10	25	50	2	4	8
P40449		NP_012105.1		235	10	25	50	10	25	50	10	25	50	10	25	50	5	19	41	10	25	50	10	25	50	2	4	10
Q03640	TCB3	NP_013639.1		1545	10	25	29	10	25	50	10	25	50	10	25	50	4	10	21	10	25	50	10	25	50	1	4	5
P26570	PPZ1	NP_013696.1	YM9571.02C	692	10	25	50	10	25	50	10	25	50	10	25	50	7	22	32	10	25	50	10	25	50	3	3	6
P43586	LOC1	NP_116656.1		204	10	25	50	10	25	50	10	25	50	10	25	50	3	3	3	10	25	50	10	25	42	3	3	8
P53866	SQS1	NP_014175.1	N1269	767	10	25	50	10	25	50	10	25	50	10	25	50	3	14	33	10	25	50	10	25	50	1	3	8
P50105	TAF4	NP_013718.1	YM8270.07	388	10	25	27	10	25	50	10	25	50	10	25	50	7	22	47	10	25	50	10	25	50	2	3	5
Q03957	CTK1	NP_012783.1		528	10	25	48	10	25	50	10	25	50	10	25	50	8	23	48	10	25	50	10	25	50	1	3	4
P43583	BLM10	NP_116648.2	YFL006W	2143	10	25	50	10	25	50	10	25	50	10	25	50	6	10	22	10	25	50	10	14	39	1	3	6
P48524	BUL1	NP_014002.1	YM8021.01C YM8156.17C	976	10	25	50	10	25	50	10	25	50	10	25	50	5	18	42	10	25	50	10	25	50	1	3	5
P39960	BEM2	NP_011082.3		2167	10	25	44	10	25	50	10	23	48	10	25	50	3	16	41	10	25	50	10	25	50	3	3	4
P40480	HOS4	NP_012154.1		1083	10	25	50	10	25	50	10	21	46	10	25	50	5	5	5	10	25	50	10	25	50	2	3	6
P25441	RPC53	NP_010131.1	D1557	422	10	25	48	10	25	50	10	25	50	10	25	50	6	21	24	10	25	50	10	25	50	1	3	10
Q05022	RRP5	NP_013956.1	YM9959.11C	1729	10	25	44	10	25	50	10	25	38	10	25	50	4	15	18	10	25	50	10	25	45	2	3	3
P33332	SEC3	NP_010924.1		1336	10	25	32	10	25	50	10	25	50	10	25	50	4	9	25	10	25	50	10	25	50	3	3	4
P28000	RPC19	NP_014286.1	N1937	142	10	25	44	10	25	50	10	25	50	10	25	50	4	4	4	10	25	46	10	25	45	2	3	5
P38990	SAK1	NP_011055.3	SYGP-ORF45	1142	10	25	41	10	25	50	10	14	33	10	25	50	4	4	14	10	25	50	10	20	45	2	3	4
P36004	KKQ8	NP_012753.2	YKL632	724	10	25	50	10	25	50	10	20	45	10	25	50	0	0	24	10	25	50	10	25	50	2	3	3
P47170	IML1	NP_012672.1	J2129	1584	10	25	40	10	25	50	10	25	48	10	25	50	1	14	23	10	25	50	10	25	50	3	3	5
P12754	GCD2	NP_011597.1		651	10	25	37	10	25	50	10	25	50	10	25	50	5	15	15	10	25	50	10	25	50	1	3	11
P16965	STF2	NP_011522.1	G3858	84	10	25	40	10	25	50	10	23	48	10	25	50	4	16	41	10	25	50	10	25	50	1	3	7
Q12267	SMC4	NP_013187.1	L9449.5	1418	10	25	46	10	25	50	10	25	50	10	25	50	5	5	17	10	25	50	10	25	50	2	3	3
P31244	RAD16	NP_009672.1;	YBR0909	790	10	25	50	10	25	50	10	24	45	10	25	50	2	2	11	10	25	50	10	19	30	0	2	5
Q04779	RCO1	NP_013791.1;	YM9916.14	684	10	25	50	10	25	50	10	25	44	10	25	50	6	21	27	10	25	48	10	25	50	2	2	7
P43609	RSC8	NP_116695.3;		557	10	25	31	10	25	50	10	25	48	10	25	50	5	15	22	10	25	50	10	25	44	2	2	3
P25357	SNT1	NP_009962.2;	YCR33W YCR592	1226	10	25	36	10	25	50	10	25	50	10	25	50	5	20	45	10	25	50	10	25	50	0	2	4
P53197	CDH1	NP_011512.1;		566	10	25	50	10	25	50	10	25	49	10	25	50	7	21	40	10	25	50	10	25	50	0	2	3
P17106	CBF1	NP_012594.1;	J1730	351	10	25	38	10	25	50	10	25	50	10	25	50	5	5	11	10	25	50	10	25	50	1	2	4
Q03758	BUL2	NP_013596.1;	YM8339.08	920	10	25	39	10	25	50	10	25	50	10	25	50	6	16	28	10	25	50	10	25	48	1	2	3
P43579	IES1	NP_116641.1;		692	10	25	48	10	25	50	10	25	50	10	25	50	3	8	20	10	25	50	10	25	50	1	2	3
P45976	FIP1	NP_012626.1;	J1911	327	10	25	50	10	25	50	10	25	50	10	25	50	6	10	25	10	25	50	10	25	50	1	2	4
P24783	DBP2	NP_014287.3;	N1945	546	10	25	46	10	25	50	10	25	50	10	25	50	4	19	44	10	25	50	10	25	50	0	2	2
Q06505	SPN1	NP_015458.1;		410	10	25	50	10	25	50	10	25	50	10	25	50	4	12	22	10	25	50	10	25	50	1	2	4
P23615	SPT6	NP_011631.1;	G6169	1451	10	25	49	10	25	50	10	25	50	10	25	50	4	5	6	10	25	50	10	25	50	1	2	2
P40693	RLP7	NP_014396.3;	N2014	322	10	25	50	10	25	50	10	25	47	10	25	50	5	5	5	10	25	50	10	21	30	1	2	8
P46678	BDP1	NP_014359.3;	N2682	594	10	25	50	10	25	50	10	25	50	10	25	50	7	12	27	10	25	50	10	25	50	1	2	4
P40563	AIM21	NP_012268.3;	YIB3W	679	10	25	50	10	25	50	10	25	50	10	25	50	6	16	41	10	25	50	10	25	50	1	2	3
P06244	TPK1	NP_012371.2;	J0541	397	10	25	50	10	25	50	10	25	50	10	25	50	7	15	20	10	25	50	10	25	50	0	2	4
P35724	MNR2	NP_012859.1;		969	10	25	49	10	25	50	10	25	50	10	25	50	6	18	18	10	25	50	10	25	50	1	2	8
P25293	NAP1	NP_012974.1;		417	10	25	25	10	25	50	10	25	50	10	25	50	5	20	32	10	25	47	10	25	45	2	2	4
P31376	SWC3	NP_009391.2;		625	10	25	50	10	25	50	10	25	50	10	25	50	3	3	28	10	25	50	10	25	50	1	2	3
Q06412	TUS1	NP_013529.3;		1307	10	25	41	10	25	50	10	25	48	10	25	50	4	4	24	10	25	50	10	25	50	0	2	3
P40968	CDC40	NP_010652.3;	D9481.11	455	10	25	50	10	25	50	10	24	49	10	25	50	7	21	40	10	25	50	10	25	50	0	2	5
P05030	PMA1	NP_011507.1;		918	10	25	37	10	25	50	10	25	50	10	25	50	10	17	26	10	25	50	10	25	50	0	1	2
P38439	LEO1	NP_014766.1;	O3278 YOR3278C	464	10	25	50	10	25	50	10	25	50	10	25	50	7	16	34	10	25	50	10	25	50	0	1	3
P32832	NPL6	NP_013809.1;	YM9582.16C	435	10	25	43	10	25	50	10	25	50	10	25	50	7	12	20	10	25	50	10	25	50	0	1	1
Q03944	VPS64	NP_010486.3;	YD9346.10C	604	10	25	50	10	25	50	10	25	50	10	25	50	2	17	42	10	25	50	10	25	50	1	1	3
Q03388	VPS72	NP_010773.4;		795	10	25	44	10	25	50	10	11	17	10	25	50	5	5	5	10	25	50	10	21	37	1	1	4
P07249	ARG80	NP_013756.1;	YM9532.07	177	10	25	50	10	25	50	10	25	50	10	25	50	10	25	50	10	25	50	10	25	50	0	1	2
P36121	RPC37	NP_012950.3;		282	10	25	50	10	25	50	10	25	50	10	25	50	5	5	5	10	25	48	10	25	50	1	1	2
P36024	SIS2	NP_012998.1;		562	10	25	41	10	25	50	10	25	50	10	25	50	5	10	20	10	25	48	10	25	50	1	1	4
P40541	IRR1	NP_012238.1;		1150	10	25	50	10	25	50	10	21	46	10	25	50	3	3	3	10	25	50	10	25	50	0	1	3
P11075	SEC7	NP_010454.3;	YD9395.01C YD9489.05C	2009	10	25	46	10	25	50	10	25	50	10	25	50	4	7	16	10	25	50	10	25	50	0	1	5
Q08492	BUD21	NP_014721.1;	YOR29-29	214	10	25	44	10	25	50	10	17	41	10	25	50	4	4	16	10	25	50	10	25	50	1	1	4
P43572	EPL1	NP_116629.1;		832	10	25	50	10	25	50	10	25	50	10	25	50	5	20	45	10	25	50	10	25	50	0	1	2
P50946	OCA1	NP_014300.3;	N2194	238	10	25	46	10	25	50	10	25	50	10	25	50	5	5	5	10	25	50	10	25	46	1	1	1
P40061	TSC11	NP_011018.1;		1430	10	25	50	10	25	50	10	25	50	10	25	50	5	13	35	10	25	50	10	25	50	1	1	2
P40072	SLX8	NP_011041.3;		274	10	25	50	10	25	50	10	25	50	10	25	50	6	7	7	10	25	50	10	18	43	0	1	1
Q03497	STE20	NP_011856.1;		939	10	25	38	10	25	50	10	25	50	10	25	50	6	21	40	10	25	47	10	25	50	0	1	1
P38282	SPP381	NP_009710.3;	YBR1202	291	10	25	42	10	25	50	10	25	50	10	25	50	1	11	21	10	25	50	10	25	50	1	1	2
P23595	PPH22	NP_010093.1;	D1271	377	10	25	45	10	25	50	10	25	50	10	25	50	4	19	38	10	25	50	10	25	50	0	0	2
P19735	PRP6	NP_009611.1;	YBR0508	899	10	25	50	10	25	50	10	25	50	10	25	50	3	18	18	10	25	50	10	25	47	0	0	4
Q02796	LGE1	NP_015270.1;		332	10	25	37	10	25	50	10	25	40	10	25	50	8	23	48	10	25	50	10	25	50	0	0	0
P38959	VPS41	NP_010365.3;	D446 YD8554.13	992	10	25	50	10	25	50	10	25	49	10	25	50	8	10	20	10	25	50	10	25	50	0	0	2
P04821	CDC25	NP_013413.1;	L2142.6	1589	10	25	50	10	25	50	10	25	47	10	25	50	9	24	49	10	25	50	10	25	50	0	0	0
P25555	GBP2	NP_009916.1;	YCL11C	427	10	25	50	10	25	50	10	25	50	10	25	50	4	11	36	10	25	50	10	25	50	0	0	0
P15646	NOP1	NP_010270.1;	D2870	327	10	25	50	10	25	50	10	25	50	10	25	50	7	22	47	10	25	50	10	25	50	0	0	0
P53734	DBP6	NP_014436.1;	N3302	629	10	25	36	10	25	50	10	25	50	10	25	50	4	15	25	10	25	50	10	25	50	0	0	1
P06105	SCP160	NP_012455.1;	J1017	1222	10	25	42	10	25	50	10	25	50	10	25	50	5	11	16	10	25	50	10	25	50	0	0	2
Q03323	SDC1	NP_010757.3;		175	10	25	25	10	25	50	10	25	50	10	25	50	5	5	16	10	25	50	10	25	46	0	0	2
P53739	FPK1	NP_014445.1;	N3449	893	10	25	50	10	25	50	10	25	36	10	25	50	1	3	8	10	25	50	10	25	50	0	0	2
P35817	BDF1	NP_013503.1;	L8084.18	686	10	25	38	10	25	50	10	25	50	10	25	50	7	22	40	10	25	50	10	25	50	0	0	1
P29469	MCM2	NP_009530.1;	YBL0438	868	10	25	32	10	25	50	10	25	50	10	25	50	3	17	42	10	25	50	10	25	50	0	0	0
P38922	HRB1	NP_014394.2;	N2009	454	10	25	50	10	25	50	10	25	50	10	25	50	6	14	39	10	25	50	10	25	50	0	0	1
P40317	SOK1	NP_010289.3;	YD8119.12C	901	10	25	50	10	25	50	10	25	50	10	25	50	7	22	47	10	25	50	10	25	50	0	0	3
P39520	IFH1	NP_013324.1	L8083.9	1085	10	24	45	10	25	50	10	25	50	10	25	50	5	14	29	10	25	50	10	25	50	3	5	8
Q02554	CUS1	NP_013967.1	YM9408.02C	436	10	24	38	10	25	50	10	22	34	10	25	50	4	10	18	10	21	28	10	24	40	2	4	9
P34164	SIP2	NP_011307.1	G1155	415	10	24	37	10	25	50	10	25	45	10	25	50	6	6	16	10	25	50	10	25	41	1	4	7
P17891	CLC1	NP_011683.3		233	10	24	41	10	25	50	10	25	46	10	25	50	5	19	19	10	25	50	10	25	50	1	3	5
Q06001	FAR10	NP_013339.1		478	10	24	46	10	25	50	10	25	50	10	25	50	6	20	34	10	25	48	10	21	46	1	3	7
P38326	SWC5	NP_009790.3;	YBR1529	303	10	24	49	10	25	50	10	25	50	10	25	50	4	4	25	10	25	50	10	25	50	1	2	4
P80667	PEX13	NP_013292.1;	L9470.1	386	10	24	35	10	25	50	10	25	50	10	25	50	5	9	23	10	25	50	10	25	50	1	1	1
P41895	TFG1	NP_011702.1;	G7526	735	10	24	38	10	25	50	10	25	50	10	25	50	6	17	32	10	25	50	10	25	50	0	1	1
P47047	MTR4	NP_012485.1;	J1158	1073	10	24	46	10	25	50	10	25	50	10	25	50	5	15	31	10	25	50	10	25	50	0	1	4
P38634	SIC1	NP_013180.1;	L9449.8	284	10	24	38	10	25	50	10	25	50	10	25	50	7	22	47	10	25	50	10	25	50	0	0	3
P32917	STE5	NP_010388.1;	YD8557.12	917	10	24	42	10	25	50	10	19	32	10	25	50	5	20	26	10	25	50	10	25	43	0	0	3
Q03338	PRP3	NP_010761.3	D8035.16	469	10	23	32	10	25	50	10	25	45	10	25	50	6	16	16	10	25	50	10	18	28	1	3	6
P21373	UTR1	NP_012583.1;	J1655	530	10	23	23	10	25	50	10	25	50	10	25	50	5	20	24	10	25	32	10	25	50	1	2	5
Q08773	ISW2	NP_014948.1;		1120	10	23	48	10	25	50	10	25	50	10	25	50	4	11	28	10	25	50	10	25	50	0	2	4
Q12176	MAK21	NP_010345.3;	D4237 YD9609.14	1025	10	23	48	10	25	50	10	25	47	10	25	50	8	11	11	10	25	50	10	25	50	0	2	11
P38429	SAP30	NP_013990.1;	YM8156.05	201	10	23	23	10	25	50	10	25	50	10	25	50	4	19	44	10	25	50	10	25	50	0	0	0
Q02516	HAP5	NP_015003.1;		242	10	23	27	10	25	50	10	25	50	10	25	50	5	20	21	10	25	50	10	25	50	0	0	0
P40991	NOP2	NP_014338.3	N2428 YNL2428W	618	10	22	47	10	25	50	10	25	50	10	25	50	3	3	16	10	25	50	10	25	50	2	5	11
Q99383	HRP1	NP_014518.1		534	10	22	33	10	25	50	10	25	50	10	25	50	7	14	14	10	25	50	10	25	50	0	3	4
Q12523		NP_015077.1;		523	10	22	22	10	25	50	10	25	50	10	25	50	5	20	45	10	25	50	10	25	50	1	2	2
Q12389	DBP10	NP_010253.2;	D2770	995	10	22	35	10	25	50	10	25	50	10	25	50	3	13	27	10	25	50	10	23	41	2	2	2
P08678	CYR1	NP_012529.3;	J1401	2026	10	22	47	10	25	50	10	25	50	10	25	50	7	10	12	10	25	50	10	25	50	1	1	4
Q04673	SSL1	NP_013105.1;		461	10	22	47	10	25	50	10	23	48	10	25	50	3	3	3	10	25	50	10	17	42	0	1	1
Q06266	TOS4	NP_013284.1;	L94705.22	489	10	22	23	10	25	50	10	25	48	10	25	50	6	21	42	10	25	50	10	25	50	0	1	4
P32481	GCD11	NP_010942.1;		527	10	22	36	10	25	50	10	25	50	10	25	50	6	11	11	10	25	50	10	25	50	0	0	4
Q02100	SKO1	NP_014232.1;	N1702	647	10	22	36	10	25	50	10	25	46	10	25	50	5	17	33	10	25	50	10	25	50	0	0	3
Q00402	NUM1	NP_010434.1	YD8358.06	2748	10	21	34	10	25	50	10	25	41	10	25	50	5	16	21	10	25	50	10	25	50	2	3	4
Q03373	DIG2	NP_010768.1;	D8035.23	323	10	21	32	10	25	50	10	24	31	10	25	50	3	3	3	10	25	46	10	25	30	1	1	4
P08004	CHS1	NP_014207.2;	N1404	1131	10	21	21	10	25	50	10	25	50	10	25	50	7	13	15	10	25	50	10	25	50	0	1	1
P32828	SLX5	NP_010271.3;	D2875	619	10	21	42	10	25	50	10	25	31	10	25	50	6	19	19	10	25	50	10	25	38	1	1	2
Q07442	BDF2	NP_010213.1;		638	10	21	43	10	25	50	10	25	48	10	25	50	5	7	32	10	25	50	10	25	50	0	0	1
P32913	VPS17	NP_014775.3;	O3314 YOR3314W	551	10	21	40	10	25	50	10	25	50	10	25	50	5	20	34	10	25	50	10	25	50	0	0	0
P53091	MCM6	NP_011314.2;		1017	10	21	21	10	25	50	10	25	50	10	25	50	8	23	48	10	25	50	10	25	50	0	0	0
P38996	NAB3	NP_015134.1;		802	10	21	32	10	25	50	10	25	50	10	25	50	6	21	35	10	25	50	10	25	50	0	0	0
Q00578	SSL2	NP_012123.1		843	10	20	45	10	25	50	10	25	50	10	25	50	4	19	40	10	25	50	10	25	50	1	3	3
Q08438	VHS3	NP_014697.1	YOR29-05	674	10	20	36	10	25	50	10	25	50	10	25	50	7	10	34	10	25	50	10	25	50	2	3	3
P38129	TAF5	NP_009757.1;	YBR1410	798	10	20	23	10	25	50	10	25	50	10	25	50	6	21	46	10	25	50	10	25	50	1	2	2
P14064	HAP4	NP_012813.1;	YKL465	554	10	20	25	10	25	50	10	24	49	10	25	50	2	12	37	10	25	50	10	25	50	1	2	2
Q07362	PBP4	NP_010230.1;	D2574	185	10	20	28	10	25	50	10	25	49	10	25	50	9	19	32	10	25	50	10	25	43	0	1	4
P38272	SHE3	NP_009688.3;	YBR1005	425	10	20	35	10	25	50	10	25	46	10	25	50	8	10	22	10	25	50	10	25	50	0	1	2
P48415	SEC16	NP_015240.1	LPF1W	2195	10	19	41	10	25	50	10	25	50	10	25	50	4	4	17	10	25	50	10	25	50	3	11	11
P32380	SPC110	NP_010643.3	D9476.3	944	10	19	44	10	25	50	10	13	36	10	25	50	6	11	26	10	25	50	10	25	50	0	3	4
O13297	CET1	NP_015096.1;	P1433	549	10	19	37	10	25	50	10	20	44	10	25	50	8	9	9	10	25	50	10	13	30	1	1	4
P40568	DSN1	NP_012275.3;	YIB10W	576	10	19	36	10	25	50	10	25	48	10	25	50	6	11	11	10	25	48	10	22	36	0	1	3
P30665	MCM4	NP_015344.1;	YP9531.13	933	10	19	19	10	25	50	10	25	49	10	25	50	6	21	46	10	25	50	10	25	50	1	1	1
P24870	CLB3	NP_010126.1;	D1539	427	10	19	21	10	25	50	10	25	34	10	25	50	6	21	25	10	25	42	10	25	50	0	0	1
Q12191	BUG1	NP_010184.1		341	10	18	43	10	25	50	10	25	50	10	25	50	3	3	22	10	25	50	10	25	50	1	4	13
P25339	PUF4	NP_011501.1;	YGL023	888	10	18	24	10	25	50	10	24	49	10	25	50	3	3	3	10	10	24	10	20	44	2	2	3
Q02775	SLU7	NP_010373.3;	D4483	382	10	18	43	10	25	50	10	25	48	10	25	50	8	9	14	10	25	50	10	25	50	0	2	5
P53131	PRP43	NP_011395.1;		767	10	18	18	10	25	50	10	25	50	10	25	50	4	10	17	10	25	50	10	25	50	1	1	3
P24276	SSD1	NP_010579.1;	D9819.4	1250	10	18	22	10	25	50	10	25	39	10	25	50	8	23	28	10	25	50	10	25	38	1	1	3
Q08229	NBA1	NP_014571.1;		501	10	18	43	10	25	50	10	22	46	10	25	50	3	3	13	10	25	39	10	25	50	0	0	2
Q12348	RRI2	NP_014524.1;		645	10	18	36	10	25	50	10	25	50	10	25	50	8	11	19	10	25	50	10	25	50	0	0	1
P24869	CLB2	NP_015444.1;	P9642.6	491	10	18	36	10	25	50	10	21	33	10	25	50	7	10	22	10	25	47	10	20	25	0	0	2
P24814	GRR1	NP_012623.1;	J1885	1151	10	18	28	10	25	50	10	25	50	10	25	50	8	23	48	10	25	50	10	25	50	0	0	0
P14680	YAK1	NP_012394.1;	J0652	807	10	17	25	10	25	50	10	25	50	10	25	50	10	25	50	10	25	50	10	25	50	0	0	0
P32578	SIP1	NP_010710.4;	D9461.11	815	10	16	33	10	25	50	10	25	50	10	25	50	9	18	18	10	25	50	10	25	50	0	2	5
P39935	TIF4631	NP_011678.3;		952	10	16	39	10	25	50	10	25	50	10	25	50	5	5	22	10	25	50	10	25	50	0	2	4
Q03790	NUP53	NP_013873.1;	YM8520.02	475	10	16	16	10	25	50	10	25	50	10	25	50	4	4	11	10	25	47	10	25	50	1	1	4
Q04739	GAL83	NP_010944.1;		417	10	16	24	10	25	50	10	25	45	10	25	50	7	13	22	10	25	50	10	25	43	1	1	2
P40468	TAO3	NP_012137.3;		2376	10	16	21	10	25	50	10	25	50	10	25	50	4	19	32	10	24	27	10	25	33	0	1	1
Q01560	NPL3	NP_010720.3;	D9461.19	414	10	16	22	10	25	50	10	25	50	10	25	50	2	3	28	10	25	50	10	25	50	0	0	0
P32591	SWI3	NP_012359.1;	J0495	825	10	16	25	10	25	50	10	25	50	10	25	50	7	20	25	10	25	50	10	25	50	0	0	0
P39001	UME6	NP_010493.1;	YD8142.04C	836	10	15	15	10	25	50	10	24	47	10	25	50	3	3	3	10	25	50	10	25	50	2	2	4
P39936	TIF4632	NP_011466.1;		914	10	15	19	10	25	50	10	25	50	10	25	50	8	23	42	10	25	50	10	25	50	0	2	2
P0CX57	TY1A-A	NP_009407.1;NP_058192.1;	P9659.6d	440	10	15	29	10	25	50	10	25	50	10	25	50	4	9	9	10	25	50	10	25	50	0	1	4
Q07458	RXT3	NP_010207.1;		294	10	15	29	10	25	50	10	24	49	10	25	50	5	5	6	10	25	49	10	16	39	0	1	3
P39730	FUN12	NP_009365.1		1002	10	14	30	10	25	50	10	25	50	10	25	50	2	2	20	10	25	50	10	25	50	4	4	4
P37370	VRP1	NP_013441.1;	L8300.13	817	10	14	20	10	25	50	10	25	47	10	25	50	7	22	23	10	25	50	10	25	50	0	2	6
P14907	NSP1	NP_012494.3;	J1207	823	10	14	14	10	25	50	10	25	48	10	25	50	5	20	45	10	25	50	10	25	50	1	1	1
Q05166	ASM4	NP_010195.1;	D2420	528	10	14	14	10	25	50	10	25	50	10	25	50	7	15	23	10	25	50	10	25	50	0	0	0
P30283	CLB5	NP_015445.1;	P9642.8	435	10	13	27	10	25	50	10	16	32	10	25	50	5	5	6	10	25	50	10	19	35	0	1	5
Q07622	ACK1	NP_010078.1;	D1066	623	10	13	17	10	25	50	10	25	47	10	25	50	6	11	35	10	19	33	10	25	50	0	1	2
P19263	RGR1	NP_013172.1;		1082	10	13	34	10	25	50	10	25	50	10	25	50	6	6	25	10	25	50	10	25	50	0	1	2
P50875	SPT20	NP_014493.1;		604	10	13	13	10	25	50	10	25	50	10	25	50	9	24	47	10	25	33	10	25	50	0	0	0
P18480	SNF5	NP_009848.4;	YBR2036	905	10	13	13	10	25	50	10	16	17	10	25	50	8	23	23	10	25	50	10	25	50	0	0	0
P53894	CBK1	NP_014238.3;	N1727	756	10	12	12	10	25	50	10	25	50	10	25	50	5	15	24	10	25	50	10	25	50	0	0	0
P23594	PPH21	NP_010147.1;	D2180	369	10	25	35	10	25	50	10	25	50	10	25	49	5	8	33	10	25	50	10	25	46	0	0	1
Q06685	VIP1	NP_013514.1		1146	10	23	27	10	25	50	10	25	44	10	25	49	3	12	19	10	25	33	10	25	50	2	3	5
P06777	RAD1	NP_015303.1;		1100	10	17	42	10	25	50	10	25	50	10	25	49	5	5	19	10	25	50	10	25	43	0	0	2
P38859	DNA2	NP_012034.1		1522	10	25	46	10	25	50	10	25	28	10	25	48	5	6	6	10	25	29	10	25	47	2	5	11
Q08921	TCO89	NP_015145.1;		799	10	25	47	10	25	50	10	19	32	10	25	48	4	4	4	10	23	30	10	25	50	1	1	4
P46676	SUM1	NP_010596.1;	D9740.19	1062	10	23	37	10	25	50	10	25	37	10	25	48	8	23	25	10	25	47	10	25	25	0	1	3
P31385	DEP1	NP_009389.3;		405	10	22	28	10	25	50	10	24	25	10	25	48	4	4	4	10	25	50	10	25	50	0	1	1
P40327	RPT2	NP_010277.1	D2920	437	10	25	50	10	25	50	10	25	47	10	25	47	7	22	44	10	25	48	10	25	50	1	7	12
Q02821	SRP1	NP_014210.1	N1606	542	10	25	50	10	25	50	10	20	41	10	23	47	10	11	11	10	25	50	10	25	40	1	3	5
P40210	SIP5	NP_013860.1;	YM9375.09	489	10	25	50	10	25	50	10	25	50	10	24	47	5	20	22	10	25	50	10	25	46	1	1	2
P06779	RAD7	NP_012586.1;	J1665	565	10	22	39	10	25	50	10	25	38	10	25	47	3	12	12	10	25	50	10	21	31	1	2	6
P39524	DRS2	NP_009376.2;	FUN38	1355	10	21	43	10	25	50	10	25	44	10	25	47	6	18	43	10	25	47	10	21	46	1	2	3
P32356	NTH1	NP_010284.1;	YD8119.07C	751	10	19	40	10	25	50	10	25	46	10	24	47	7	7	26	10	25	50	10	25	50	0	0	3
Q08816		NP_014997.1;		343	10	19	28	10	25	50	10	24	40	10	25	47	5	8	29	10	25	34	10	14	24	0	0	1
Q12060	HFI1	NP_015069.1;		488	10	15	19	10	25	50	10	23	47	10	24	47	4	19	44	10	25	50	10	25	50	1	1	2
P33299	RPT1	NP_012777.1		467	10	25	49	10	25	50	10	25	27	10	25	46	3	15	16	10	23	23	10	22	22	3	6	9
P61830	HHT1; HHT2	NP_009564.1;NP_014367.1	YBR0201; N2749	136	10	25	49	10	25	50	10	25	45	10	25	46	2	6	19	10	25	45	10	25	42	2	5	9
P40055	UTP7	NP_011005.1		554	10	25	40	10	25	50	10	25	44	10	25	46	3	3	8	10	25	38	10	25	46	2	4	10
P38764	RPN1	NP_011892.1		993	10	25	48	10	25	50	10	25	42	10	25	46	3	9	10	10	25	48	10	25	49	2	3	10
P36009	DHR2	NP_012845.1	YKL408	735	10	25	48	10	25	50	10	25	44	10	25	46	4	4	12	10	25	38	10	25	39	0	3	6
P53158	KXD1	NP_011436.1;		218	10	25	26	10	25	50	10	22	40	10	22	46	6	12	20	10	25	50	10	25	50	0	0	0
P38333	ENP1	NP_009806.3	YBR1635	483	10	22	40	10	25	50	10	21	34	10	24	46	3	3	3	10	25	50	10	21	39	2	3	8
P33302	PDR5	NP_014796.3;		1511	10	18	18	10	25	50	10	20	33	10	25	46	4	12	17	10	25	34	10	25	43	1	1	2
Q02732	CTF19	NP_015307.1;	LPB13W	369	10	17	17	10	25	50	10	25	35	10	25	46	9	16	16	10	25	41	10	25	42	0	0	1
P40078	NSA2	NP_011052.1	SYGP-ORF47	261	10	25	50	10	25	50	10	25	46	10	25	45	3	3	3	10	25	36	10	25	49	0	4	8
P53251	SLX9	NP_011595.3		210	10	25	33	10	25	50	10	23	37	10	25	45	2	11	15	10	25	40	10	25	50	2	3	4
P41896	TFG2	NP_011519.3;		400	10	25	44	10	25	50	10	25	47	10	25	45	6	21	21	10	25	50	10	25	49	0	2	3
P39010	AKR1	NP_010550.1;	D9954.9 YD9230B.03C	764	10	25	39	10	25	50	10	25	47	10	25	45	3	11	20	10	25	50	10	25	50	0	0	1
P21268	FAR1	NP_012378.1	J0565	830	10	25	50	10	25	50	10	25	43	10	25	44	4	19	25	10	25	34	10	25	29	2	3	9
Q03532	HAS1	NP_014017.1;		505	10	25	38	10	25	50	10	25	43	10	25	44	5	7	14	10	25	38	10	25	37	1	2	5
Q06178	NMA1	NP_013432.1;	L8543.16	401	10	25	30	10	25	50	10	25	33	10	25	44	5	20	25	10	25	43	10	25	50	1	1	3
P53274		NP_011642.3;	G6365	230	10	25	38	10	25	50	10	14	35	10	21	44	7	11	26	10	25	50	10	22	47	0	0	3
P40026	KRE29	NP_010955.3;		464	10	24	28	10	25	50	10	25	46	10	24	44	7	22	47	10	25	50	10	25	50	0	0	1
P35187	SGS1	NP_013915.1	YM9646.02C	1447	10	23	37	10	25	50	10	10	28	10	20	44	4	4	15	10	10	25	10	11	26	1	4	7
Q03208		NP_013587.1;	YM7056.07	357	10	15	15	10	25	50	10	20	23	10	25	44	7	22	29	10	22	22	10	15	15	0	1	2
P0CX33	RPS30A	NP_013390.1;NP_014825.3	L8003.23 YLR287BC	63	10	25	50	10	25	50	10	25	37	10	25	43	2	5	7	10	25	32	10	25	35	1	6	10
P0CX34	RPS30B	NP_013390.1;NP_014825.3		63	10	25	50	10	25	50	10	25	37	10	25	43	2	5	7	10	25	32	10	25	35	1	6	10
Q12071	VPS54	NP_010310.1	PZF889 YD9813.05C	889	10	25	48	10	25	50	10	25	44	10	25	43	5	11	36	10	25	50	10	25	50	1	3	3
P32499	NUP2	NP_013439.1;	L8300.9	720	10	25	48	10	25	50	10	25	48	10	25	43	1	10	12	10	25	33	10	25	26	1	1	5
P38316	ATG12	NP_009776.1;	YBR1506	186	10	25	39	10	25	50	10	25	45	10	25	43	3	6	6	10	25	50	10	25	44	0	0	0
Q08966	PCL8	NP_015105.1;	P1745	492	10	12	22	10	25	50	10	23	39	10	25	43	7	11	25	10	25	30	10	25	32	1	1	2
P32494	NGG1	NP_010461.3	YD9395.09	702	10	25	33	10	25	50	10	25	29	10	25	42	3	18	22	10	25	37	10	25	29	1	5	8
P40186	PCL7	NP_012214.3;		285	10	22	26	10	25	50	10	25	38	10	24	42	6	21	46	10	22	35	10	25	50	2	2	4
P21957	OPI1	NP_011843.1;		404	10	14	39	10	25	50	10	10	32	10	17	42	5	5	14	10	25	50	10	18	43	0	1	3
P53883	NOP13	NP_014224.2	N1665	403	10	25	50	10	25	50	10	22	25	10	25	41	5	5	5	10	25	50	10	25	49	1	5	11
Q05021	TAF7	NP_013954.1	YM9959.09C	590	10	25	50	10	25	50	10	25	45	10	25	41	1	11	11	10	25	42	10	23	32	2	5	13
P38263	VID24	NP_009663.1	YBR0834	362	10	25	37	10	25	50	10	25	43	10	25	41	5	6	22	10	25	48	10	25	40	1	4	4
P53743	ESF2	NP_014452.1;	N3491	316	10	25	49	10	25	50	10	17	27	10	25	41	4	6	6	10	25	50	10	25	50	1	1	7
P53551	HHO1	NP_015198.1	LPI17C	258	10	25	48	10	25	50	10	25	37	10	25	40	6	18	18	10	25	45	10	25	45	3	9	15
Q07381	TSR1	NP_010223.1		788	10	25	50	10	25	50	10	25	50	10	22	40	4	11	22	10	25	50	10	25	50	1	5	12
P20676	NUP1	NP_014741.1;	YOR3182C	1076	10	25	42	10	25	50	10	13	15	10	22	40	8	9	22	10	25	50	10	25	50	0	2	6
P40065	MAM1	NP_011032.1		302	10	22	39	10	25	50	10	14	37	10	15	40	3	3	11	10	11	34	10	14	36	2	4	9
P38803	IPI1	NP_011953.1		334	10	25	49	10	25	50	10	25	37	10	25	39	2	2	2	10	25	32	10	16	23	5	10	12
P40561	SGN1	NP_012266.1	YIB1C	250	10	25	32	10	25	50	10	11	18	10	25	39	2	2	2	10	25	50	10	25	39	2	6	9
P53917	FAR11	NP_014272.3;	N1221 N1875	953	10	25	50	10	25	50	10	17	28	10	18	39	5	6	6	10	25	44	10	12	16	1	2	6
Q02825	SEN54	NP_015242.1;	LPF3C	467	10	21	25	10	25	50	10	25	37	10	25	37	3	7	9	10	25	50	10	25	34	2	2	4
P32569	SRB4	NP_010939.1;		687	10	12	29	10	25	50	10	16	35	10	16	37	7	10	32	10	25	50	10	23	45	0	1	1
P50111	ZDS1	NP_014000.1;	YM8156.15C	915	10	25	44	10	25	50	10	22	22	10	25	36	5	5	5	10	25	29	10	25	36	0	2	5
P39720	OAF1	NP_009349.3;	FUN43	1047	10	19	26	10	25	50	10	25	50	10	20	36	5	20	45	10	25	50	10	25	50	1	2	2
Q08817	SOG2	NP_014998.3		791	10	25	39	10	25	50	10	25	36	10	25	35	4	15	15	10	25	46	10	25	44	1	3	5
P39705	NUP60	NP_009401.1;		539	10	25	43	10	25	50	10	17	24	10	25	35	3	3	3	10	15	17	10	20	30	1	2	6
Q01477	UBP3	NP_011078.3;		912	10	25	26	10	25	50	10	25	31	10	25	35	3	17	22	10	25	30	10	25	50	1	2	2
P50275	ASE1	NP_116582.1;	YOR29-09	885	10	25	38	10	25	50	10	25	38	10	25	35	7	22	29	10	25	30	10	25	33	0	1	2
P02293	HTB1	NP_010510.3	YD9934.09C	131	10	25	40	10	25	50	10	25	36	10	25	34	2	6	11	10	25	40	10	25	50	3	8	14
P38297	FZO1	NP_009738.1	YBR1241	855	10	25	38	10	25	50	10	25	37	10	25	34	4	17	29	10	25	42	10	25	29	2	4	4
P20485	CKI1	NP_013234.1;	L3130 L9606.8	582	10	25	50	10	25	50	10	25	36	10	25	34	4	4	4	10	25	38	10	25	37	0	0	0
Q08278	MED7	NP_014506.1;		222	10	18	30	10	25	50	10	14	30	10	16	33	8	20	27	10	25	50	10	19	44	0	1	7
P31383	TPD3	NP_009386.1;	FUN32	635	10	25	33	10	25	50	10	25	32	10	25	32	7	18	26	10	25	38	10	25	38	0	0	2
Q12230	LSP1	NP_015321.1;		341	10	25	36	10	25	50	10	25	33	10	25	32	3	13	22	10	25	39	10	25	39	0	0	4
P27895	CIN8	NP_010853.2;		1000	10	24	41	10	25	50	10	25	27	10	25	32	5	20	23	10	25	33	10	25	28	0	1	1
P53252	PIL1	NP_011600.3;		339	10	25	30	10	25	50	10	25	34	10	25	31	5	18	28	10	25	36	10	25	36	0	0	2
P47057	SNX4	NP_012498.1	J1244	423	10	25	36	10	25	50	10	24	45	10	18	30	7	22	38	10	24	37	10	25	45	2	6	7
P38779	CIC1	NP_011919.1		376	10	25	42	10	25	50	10	25	30	10	25	29	5	10	10	10	25	38	10	25	50	4	9	13
P53971	FAP1	NP_014375.1;	N2812	965	10	19	27	10	25	50	10	25	50	10	16	29	3	18	26	10	25	47	10	25	50	0	0	0
P51402	RPL37B	NP_010788.1	D9719.6	88	10	25	49	10	25	50	10	11	14	10	21	27	6	13	23	10	18	18	10	17	27	2	3	6
P18852	STE18	NP_012619.1;	J1866	110	10	16	30	10	25	50	10	20	20	10	23	26	5	5	5	10	25	26	10	19	19	0	1	6
P38934	BFR1	NP_014841.1		470	10	25	48	10	25	50	10	13	17	10	15	25	2	2	2	10	14	18	10	13	24	2	4	7
P39702	VPS8	NP_009399.2;	FUN15	1274	10	18	21	10	25	50	10	15	22	10	14	23	6	11	20	10	18	39	10	23	38	0	1	2
P49166	RPL37A	NP_013286.1	L9470.6	88	10	25	48	10	25	50	10	11	12	10	19	22	6	13	19	10	18	18	10	18	20	2	3	6
Q03018	ESP1	NP_011612.3;		1630	10	19	27	10	25	50	10	24	31	10	17	20	3	15	27	10	20	26	10	22	37	1	2	3
P32495	NHP2	NP_010073.2	D1045	156	10	24	42	10	25	50	10	19	19	10	18	18	3	3	3	10	18	18	10	25	29	3	5	13
P20448	HCA4	NP_012501.1	J1250	770	10	20	45	10	25	50	10	13	13	10	15	15	5	5	8	10	17	17	10	17	17	2	4	10
P14284	REV3	NP_015158.1;	P2535	1504	10	22	22	10	25	50	10	16	17	10	13	14	5	5	22	10	21	21	10	22	34	0	1	2
Q08965	BMS1	NP_015107.1		1183	9	24	42	10	25	50	10	25	50	10	25	50	2	2	2	10	24	24	10	25	50	2	7	9
P33339	TFC4	NP_011561.3		1025	9	24	32	10	25	50	10	25	49	10	25	50	1	1	1	10	25	50	10	25	50	3	4	5
P32833	ORC2	NP_009616.1;	YBR0523	620	9	24	44	10	25	50	10	25	50	10	25	50	3	12	15	10	25	50	10	25	45	0	2	4
P36076	CAB3	NP_012835.1;		571	9	24	49	10	25	50	10	23	43	10	25	50	5	13	13	10	25	50	10	25	50	1	2	4
Q03407	PKH1	NP_010778.3;		766	9	24	27	10	25	50	10	25	50	10	25	50	6	6	26	10	25	50	10	25	50	0	1	1
P25567	SRO9	NP_009893.2;	YCL37C	434	9	24	48	10	25	50	10	25	45	10	25	50	5	5	22	10	25	50	10	25	50	0	1	3
Q04322	GYL1	NP_013917.1;	YM9646.04	720	9	24	49	10	25	50	10	25	50	10	25	50	4	11	11	10	25	50	10	25	50	0	1	3
P40154	IES2	NP_014184.1;	N1315	320	9	24	45	10	25	50	10	25	44	10	25	50	4	11	13	10	25	50	10	25	44	0	0	1
P53172	SDS23	NP_011459.2;		527	9	24	41	10	25	50	10	25	50	10	25	50	5	16	21	10	25	50	10	25	50	0	0	3
P22579	SIN3	NP_014639.1;		1536	9	24	47	10	25	50	10	25	50	10	25	50	6	21	34	10	25	50	10	25	50	0	0	2
Q12344	GYP5	NP_015075.1;		894	9	23	27	10	25	50	10	25	50	10	25	50	6	13	19	10	25	50	10	25	50	2	2	3
Q03330	GCN5	NP_011768.1		439	9	22	45	10	25	50	10	25	50	10	25	50	3	3	6	10	25	50	10	20	43	1	3	6
P32457	CDC3	NP_013418.2;	L8543.7	520	9	20	37	10	25	50	10	25	50	10	25	50	2	2	16	10	25	50	10	25	50	2	2	3
P06774	HAP2	NP_011277.1;		265	9	20	40	10	25	50	10	25	50	10	25	50	4	4	12	10	25	50	10	25	50	1	1	3
P38827	SET1	NP_011987.1;		1080	9	20	28	10	25	50	10	25	50	10	25	50	2	12	24	10	25	50	10	25	50	0	0	0
Q12386	ARP8	NP_014784.1;	YOR3348C	881	9	19	37	10	25	50	10	25	50	10	25	50	3	6	7	10	25	50	10	25	50	0	0	0
P38631	FKS1	NP_013446.1;	L8300.6	1876	9	18	18	10	25	50	10	25	50	10	25	50	6	21	45	10	25	50	10	25	50	0	0	0
P38915	SPT8	NP_013156.1;	L2144	602	9	18	43	10	25	50	10	25	50	10	25	50	5	5	26	10	25	50	10	25	50	0	0	1
P53955	SLM2	NP_014351.3;	N2515 YNL2515P	656	9	12	12	10	25	50	10	23	48	10	25	50	3	3	7	10	25	44	10	18	43	0	0	1
P40482	SEC24	NP_012157.3;		926	9	11	11	10	25	50	10	25	50	10	25	50	3	5	30	10	25	50	10	25	50	2	2	2
P43124	NSE4	NP_010178.1;	D2354	402	9	24	46	10	25	50	10	25	50	10	25	45	4	16	31	10	25	50	10	25	45	1	2	7
P28519	RAD14	NP_013928.1	YM8325.02C	371	9	18	41	10	25	50	10	10	25	10	19	44	2	2	8	10	19	33	10	18	43	2	4	5
P53316		NP_011766.3;		781	9	17	39	10	25	50	10	25	38	10	25	44	4	16	16	10	25	45	10	20	29	0	0	2
P12383	PDR1	NP_011502.1;		1068	9	24	48	10	25	50	10	25	36	10	25	34	5	20	30	10	25	48	10	25	44	1	1	6
P26309	CDC20	NP_011399.1;		610	9	24	48	10	25	50	10	12	22	10	16	29	7	9	12	10	25	50	10	18	35	1	1	5
P38991	IPL1	NP_015115.1		367	8	23	48	10	25	50	10	25	50	10	25	50	3	15	40	10	25	50	10	25	50	1	3	5
Q07528	ATG20	NP_010170.1;		640	8	23	40	10	25	50	10	25	50	10	25	50	6	15	28	10	25	50	10	25	50	0	2	6
Q12433	AHC1	NP_014666.1;	OR26.13	566	8	23	32	10	25	50	10	25	50	10	25	50	3	18	34	10	25	50	10	25	50	1	2	4
Q02884	ELP4	NP_015224.1;		456	8	23	48	10	25	50	10	25	50	10	25	50	2	17	39	10	25	50	10	25	50	1	1	1
P15274	AMD1	NP_013677.1;		810	8	23	28	10	25	50	10	25	48	10	25	50	5	17	18	10	25	50	10	25	50	0	0	1
P27692	SPT5	NP_013703.1;	YM9571.08	1063	8	22	46	10	25	50	10	25	50	10	25	50	9	10	31	10	25	50	10	25	50	0	0	2
P40460	NDC80	NP_012122.3;		691	8	22	46	10	25	50	10	25	50	10	25	50	6	6	6	10	25	50	10	25	47	0	0	1
P33334	PRP8	NP_012035.1;		2413	8	16	16	10	25	50	10	25	50	10	25	50	9	24	49	10	25	50	10	25	50	0	0	0
P40989	GSC2	NP_011546.3;		1895	8	16	16	10	25	50	10	25	50	10	25	50	8	23	31	10	25	50	10	25	50	0	0	0
Q07897	CMS1	NP_013103.1;		291	8	12	37	10	25	50	10	17	42	10	22	47	9	11	27	10	25	50	10	25	50	0	1	4
P54786	ZDS2	NP_013598.1;	YM8339.10	942	8	23	39	10	25	50	10	25	43	10	25	42	2	17	20	10	25	25	10	25	50	1	1	6
P40352	RAD26	NP_012569.1	J1606	1085	8	20	27	10	25	50	10	16	16	10	20	35	3	3	3	10	21	21	10	18	18	2	3	4
Q12030	TAF10	NP_010451.3;	YD9489.02	206	7	22	34	10	25	50	10	25	50	10	25	50	3	14	29	10	25	50	10	25	38	0	0	4
P04786	TOP1	NP_014637.1;		769	7	21	44	10	25	50	10	24	35	10	25	50	5	16	16	10	25	50	10	25	50	1	1	4
P42846	KRI1	NP_014091.1	N0388	591	7	20	45	10	25	50	10	25	49	10	25	50	2	2	2	10	25	50	10	25	50	3	5	8
P09547	SWI1	NP_015309.1;	LPA1	1314	7	19	32	10	25	50	10	25	50	10	25	50	7	22	47	10	25	50	10	25	50	0	0	0
Q08732	HRK1	NP_014910.1;		759	7	18	27	10	25	50	10	25	50	10	25	50	5	20	27	10	25	50	10	25	50	0	0	2
P38956	SNF11	NP_010358.3;	D4411	169	7	18	18	10	25	50	10	25	36	10	25	50	6	21	25	10	24	25	10	25	34	0	0	0
P40960	PAC11	NP_010776.1		533	7	15	27	10	25	50	10	25	50	10	25	50	0	0	9	10	23	23	10	25	50	2	4	5
P40316	PDS1	NP_010398.3;	YD9727.08C	373	7	15	23	10	25	50	10	23	44	10	25	50	5	18	21	10	25	41	10	25	33	1	1	4
Q05775	HCR1	NP_013293.1;	L8167.11	265	7	13	24	10	25	50	10	24	49	10	25	50	6	12	17	10	25	50	10	25	50	0	0	4
P47136	BUD4	NP_012625.5;	J1905	1447	7	8	20	10	25	50	10	25	50	10	25	50	6	7	22	10	25	50	10	25	43	0	2	3
P40485	SLM1	NP_012161.1;		686	7	7	7	10	25	50	10	20	45	10	25	50	6	6	6	10	25	50	10	25	50	1	1	1
P53939	NIS1	NP_014321.3;	N2337	407	7	13	20	10	25	50	10	21	29	10	24	45	6	21	39	10	18	37	10	25	50	0	0	0
P36120	DBP7	NP_012949.1;		742	6	20	45	10	25	50	10	16	40	10	25	50	6	6	6	10	11	14	10	19	19	0	1	7
P40056	GET2	NP_011006.2		285	6	19	26	10	25	50	10	25	50	10	25	50	2	5	21	10	25	50	10	20	45	1	3	4
P53549	RPT4	NP_014902.3;		437	6	13	27	10	25	50	10	25	50	10	25	50	3	18	18	10	25	50	10	25	50	0	0	0
Q07478	SUB2	NP_010199.1;		446	6	10	27	10	25	50	10	25	49	10	25	50	3	3	19	10	25	50	10	25	50	0	1	1
P43564		NP_116583.2		1073	6	8	27	10	25	50	10	24	49	10	25	50	5	5	23	10	25	50	10	25	50	0	3	3
P32521	PAN1	NP_012271.3;	YIB6C	1480	6	6	6	10	25	50	10	25	50	10	25	50	3	4	25	10	25	50	10	25	50	0	0	0
P31384	CCR4	NP_009381.1;	FUN27	837	6	6	6	10	25	50	10	25	50	10	25	50	7	10	19	10	25	50	10	25	50	0	0	1
Q06321	ATG26	NP_013290.1;		1198	6	21	45	10	25	50	10	25	50	10	25	48	5	20	31	10	25	50	10	25	50	0	2	4
P53298	OKP1	NP_011695.1;		406	6	19	30	10	25	50	10	25	38	10	25	43	3	12	22	10	25	37	10	25	50	0	0	1
P05453	SUP35	NP_010457.3;	YD9395.05	685	6	6	6	10	25	50	10	25	34	10	25	43	7	22	31	10	25	50	10	25	50	0	0	0
P49955	HSH155	NP_014015.1;	YM8021.14	971	5	15	25	10	25	50	10	25	48	10	25	50	3	15	15	10	21	21	10	25	26	0	1	4
P43596	IOC3	NP_116668.1;		787	5	5	20	10	25	50	10	25	50	10	25	50	8	8	8	10	25	50	10	25	50	0	0	0
P53064	RTF1	NP_011270.1;	HRA458	558	4	19	44	10	25	50	10	25	46	10	25	50	4	4	4	10	25	50	10	25	50	0	0	4
P20435	RPO26	NP_015513.1;	P9677.8	155	4	12	29	10	25	50	10	25	50	10	25	50	5	6	22	10	24	40	10	25	50	0	0	3
Q08925	MRN1	NP_015140.1;		612	4	9	9	10	25	50	10	25	50	10	25	50	7	22	47	10	25	50	10	25	50	0	0	0
P32336	NUD1	NP_015018.3;		851	4	17	27	10	25	50	10	25	41	10	25	47	3	5	9	10	25	50	10	25	50	0	1	3
P14922	CYC8	NP_009670.3;	YBR0908	966	4	4	4	10	25	50	10	24	42	10	25	40	5	5	5	10	25	50	10	25	45	0	0	0
P53919	NAF1	NP_014275.3;	N1888	492	3	18	41	10	25	50	10	22	46	10	25	50	4	9	29	10	25	50	10	25	50	1	2	3
P06634	DED1	NP_014847.3;		604	3	14	34	10	25	50	10	25	47	10	25	50	3	15	40	10	25	50	10	25	50	0	0	1
Q99207	NOP14	NP_010133.1	D1566	810	3	16	37	10	25	50	10	22	38	10	25	46	3	6	6	10	25	46	10	25	42	2	4	12
Q12420	SNU66	NP_014953.3	5667	587	10	23	36	10	25	50	10	21	38	10	25	48	4	4	4	10	11	11	9	10	25	1	3	5
Q03322	TLG1	NP_010756.3;	D8035.11	224	10	10	24	10	25	50	10	17	33	10	23	45	5	5	8	10	11	11	9	9	17	0	2	3
P53127	SNT2	NP_011384.1;	G2850	1403	10	25	36	10	25	50	10	12	26	10	22	36	4	4	12	10	13	31	9	9	23	1	2	6
P09938	RNR2	NP_012508.1	J1271	399	10	25	43	10	25	50	10	16	35	10	21	39	4	4	4	10	25	26	8	11	22	2	4	9
Q12080	NOP53	NP_015179.1	LPI2C P2610	455	10	25	33	10	25	50	10	24	25	10	24	29	6	8	8	10	25	27	8	12	18	2	7	9
Q06339	TFC6	NP_010649.1		672	10	25	43	10	25	50	9	11	30	10	25	50	3	3	17	10	25	50	10	17	36	2	3	6
Q99216	PNO1	NP_014788.1;	O3513 YOR3513C	274	10	25	40	10	25	50	9	18	43	10	25	50	2	16	33	10	25	50	10	25	50	2	2	2
P19880	YAP1	NP_013707.1;	YM9571.12	650	10	25	50	10	25	50	9	18	43	10	25	50	4	4	18	10	25	50	10	25	50	1	2	4
P46984	GON7	NP_012351.1;	J0420	123	10	25	50	10	25	50	9	19	44	10	25	50	2	10	35	10	18	42	10	16	36	1	2	3
Q03063	DIG1	NP_015276.1;	P7102.02	452	10	25	44	10	25	50	9	21	46	10	25	50	4	6	24	10	25	50	10	25	50	0	1	3
P33419	SPC29	NP_015201.1	LPH3W	253	10	20	40	10	25	50	9	14	34	10	25	50	6	8	12	10	25	50	10	25	50	0	3	7
P53829	CAF40	NP_014111.1;	N0540	373	10	18	18	10	25	50	9	22	47	10	25	50	4	19	44	10	25	50	10	25	50	1	1	1
P28003	FUN19	NP_009368.2;		413	10	10	23	10	25	50	9	13	35	10	23	48	4	4	20	10	21	46	10	21	45	1	2	4
P38712	RRP3	NP_011932.2		501	10	18	33	10	25	50	9	9	24	10	20	41	1	1	6	10	25	50	10	15	40	5	7	10
P32639	BRR2	NP_011099.1	SYGP-ORF66	2163	10	25	42	10	25	50	9	9	30	10	15	38	3	3	6	10	12	27	10	12	29	3	5	8
P36116	VPS51	NP_012945.1		164	10	20	41	10	25	50	9	9	23	10	13	37	3	3	3	10	25	50	10	21	42	2	3	5
Q06344	ESF1	NP_010653.1		628	10	25	50	10	25	50	9	9	11	10	17	32	5	9	10	10	21	32	10	24	24	2	4	11
Q12495	RLF2	NP_015343.1	YP9531.12	606	10	21	46	10	25	50	9	9	10	10	10	23	2	2	8	10	12	12	10	18	24	1	4	9
P06838	RAD10	NP_013614.1		210	9	14	39	10	25	50	9	12	37	10	25	50	7	7	11	10	25	50	10	16	41	0	3	4
O94742	SEM1	NP_010651.3		89	9	24	49	10	25	50	9	9	14	10	25	49	3	3	3	10	17	17	10	11	11	0	5	7
P36145	TFA2	NP_012988.1		328	7	19	44	10	25	50	9	9	22	10	17	42	4	4	4	10	12	31	7	7	17	1	4	8
P29478	SEC65	NP_013602.1;	YM8339.14C	273	10	15	32	10	25	50	9	9	26	10	19	43	3	3	8	10	25	50	5	6	31	0	0	2
P42223	SBE2	NP_010638.3;	D9476.7	864	9	24	42	10	25	50	9	18	33	10	25	41	2	5	5	10	25	50	5	18	43	0	2	7
Q12510	CMR1	NP_010125.1	D1536	522	7	7	22	10	25	50	9	9	22	10	24	45	2	2	2	10	18	35	5	5	18	2	5	10
P39015	STM1	NP_013251.1;	L9634.1	273	10	22	47	10	25	50	8	10	35	10	25	50	7	7	28	10	25	50	10	25	50	0	1	6
Q06631	BFR2	NP_010585.3		534	9	21	38	10	25	50	8	9	34	10	25	50	4	4	18	10	25	50	10	17	41	1	3	4
P36084	MUD2	NP_012849.1	YKL358	527	8	20	42	10	25	50	8	8	21	10	25	50	2	2	4	10	20	39	10	20	35	1	4	7
Q12017	PLP2	NP_014924.3;		286	9	18	28	10	25	50	10	19	37	10	21	45	2	2	2	8	8	13	6	8	10	0	1	3
Q08923	CTI6	NP_015144.1;		506	10	18	38	10	25	50	10	20	31	10	25	50	5	6	6	7	7	7	10	14	16	1	2	2
P04650	RPL39	NP_012346.1	J0360	51	9	23	48	10	25	50	10	25	39	10	25	49	1	1	4	7	7	9	6	17	25	2	6	8
P32600	TOR2	NP_012719.2		2474	10	22	47	10	25	50	10	25	50	9	24	49	5	5	19	10	25	50	10	25	50	2	3	6
P41818	GLC8	NP_014042.1;	YM9924.03C	229	10	18	35	10	25	50	10	25	47	9	24	49	4	4	10	10	22	22	10	21	38	1	1	4
P47113	BFA1	NP_012587.3;	J1667	574	10	16	34	10	25	50	10	25	49	9	24	49	6	7	17	10	16	16	10	14	29	0	0	0
Q04377	LCD1	NP_010787.3;		747	10	17	32	10	25	50	10	24	44	9	24	48	4	16	23	10	25	46	10	15	15	0	0	0
P37366	CCL1	NP_015350.1	YP9367.05C	393	10	20	43	10	25	50	10	25	47	9	24	44	6	11	26	10	25	44	10	25	47	1	3	7
P32389	MET4	NP_014296.4;	N2177	672	10	11	11	10	25	50	10	25	48	9	22	43	4	8	27	10	25	50	10	25	50	1	2	2
Q12009	TRM8	NP_010080.1	D1075	286	10	22	47	10	25	50	10	21	23	9	19	27	5	7	7	10	17	17	10	14	25	2	5	10
P41800	MMM1	NP_013095.1;	L1357	426	10	17	29	10	25	50	10	18	26	9	9	18	6	6	16	10	14	14	10	20	34	0	1	3
P26755	RFA3	NP_012362.1;	J0506	122	10	19	38	10	25	50	10	10	10	9	9	11	6	8	8	10	17	17	10	16	24	0	0	2
Q05934	VID22	NP_013477.1;		901	9	23	45	10	25	50	10	25	50	9	24	49	4	7	20	10	25	50	10	25	50	0	0	0
P33297	RPT5	NP_014760.3;	O3258 YOR3258W	434	9	17	22	10	25	50	10	16	16	9	23	23	2	2	2	10	13	13	10	16	16	0	0	1
P20433	RPB4	NP_012395.1;	J0654	221	10	25	33	10	25	50	10	16	16	9	24	42	7	7	7	10	25	32	9	9	9	0	2	3
P13382	POL1	NP_014297.3	N2181	1468	7	18	32	10	25	50	10	17	27	9	24	41	3	7	16	10	25	46	8	18	27	3	4	6
P28006	GAC1	NP_014821.3;		793	9	19	41	10	25	50	10	18	41	9	22	42	5	18	28	10	15	18	5	20	45	0	2	5
Q08687	TMA16	NP_014895.2		178	5	19	33	10	25	50	10	25	38	9	24	45	4	6	6	10	25	26	4	4	4	2	7	13
P36124	SET3	NP_012954.3		751	10	19	40	10	25	50	9	9	29	9	13	35	6	6	6	10	25	50	10	25	50	1	4	7
P15436	POL3	NP_010181.2	D2366	1097	10	22	47	10	25	50	10	22	35	9	24	42	3	3	4	8	8	8	10	25	41	1	4	5
Q12476	AIR2	NP_010106.1;		344	10	25	39	10	25	50	10	25	38	9	24	38	3	16	21	8	8	8	10	16	18	1	2	2
P36517	MRPL4	NP_013544.1	L9753.1	319	10	25	50	10	25	50	10	25	50	8	23	48	4	19	38	10	25	43	10	25	50	1	5	7
Q02630	NUP116	NP_013762.1;	YM9532.12C	1113	10	16	16	10	25	50	10	25	50	8	23	48	5	20	25	10	25	50	10	25	50	0	0	0
P46947	BUD13	NP_011341.3	G1642	266	10	25	43	10	25	50	10	25	46	8	23	47	3	14	16	10	25	50	10	25	37	0	8	11
P53278		NP_011646.1;		816	10	13	18	10	25	50	10	25	45	8	23	42	4	4	4	10	25	34	10	25	38	0	0	3
P31382	PMT2	NP_009379.2;		759	10	25	50	10	25	50	10	25	50	8	23	40	9	10	10	10	25	50	10	25	50	1	2	3
P53725	MPP6	NP_014421.3	N3230	186	10	17	38	10	25	50	10	14	36	8	12	36	6	7	25	10	25	50	10	25	50	1	4	5
P12945	NAT1	NP_010244.1	D2720	854	10	21	21	10	25	50	10	15	15	8	11	11	4	4	4	10	13	13	10	11	11	3	6	13
P34077	NIC96	NP_116657.1		839	9	17	34	10	25	50	10	18	18	8	22	25	3	10	17	10	25	41	10	25	41	1	4	4
P06700	SIR2	NP_010242.1	D2714	562	8	23	45	10	25	50	10	24	49	8	23	48	2	8	19	10	25	50	10	25	50	1	3	8
P53437	RRN9	NP_013997.1;	YM8156.12C	365	8	23	31	10	25	50	10	20	23	8	10	20	4	4	4	10	25	39	10	17	17	0	0	2
P35056	PEX5	NP_010530.1;	YD8419.11	612	7	15	21	10	25	50	10	24	45	8	23	48	7	9	28	10	25	48	10	25	50	0	2	4
P38701	RPS20	NP_011848.1		121	6	9	25	10	25	50	10	10	10	8	8	11	2	2	2	10	17	17	10	15	15	2	3	6
Q06677	SWA2	NP_010606.1	D9798.10	668	5	19	34	10	25	50	10	24	49	8	23	48	5	12	28	10	25	50	10	25	50	0	3	4
Q12213	RPL7B	NP_015126.1		244	10	19	31	10	25	50	10	23	26	8	22	28	4	4	4	10	21	21	6	6	6	1	5	8
P38630	RFC1	NP_014860.1	YOR50-7	861	10	25	50	10	25	50	9	22	47	8	23	48	4	18	30	10	25	50	10	25	50	1	3	7
Q08001	LAM6	NP_013173.1;		693	3	3	21	10	25	50	9	11	23	8	23	38	5	5	7	10	10	10	10	22	37	0	1	5
P14747	CMP2	NP_013655.1;	YM9958.05	604	9	17	41	10	25	50	9	18	39	8	23	48	5	5	13	10	25	50	8	13	36	0	2	3
P22203	VMA4	NP_014977.3;	O6241	233	10	17	32	10	25	50	9	9	9	8	16	18	6	6	6	10	13	13	6	6	6	0	2	6
P32597	STH1	NP_012140.1;		1359	3	3	21	10	25	50	10	11	29	8	14	34	3	3	8	8	8	8	10	17	35	0	0	2
P39723	SPC72	NP_009352.2;	FUN42	622	10	25	48	10	25	50	10	24	49	7	22	47	3	18	43	10	25	50	10	25	50	0	0	0
P48837	NUP57	NP_011634.1;	G6320	541	10	12	12	10	25	50	10	21	46	7	21	46	8	23	48	10	25	50	10	25	50	0	1	1
Q12749	SMC6	NP_013487.1;	L3502.2	1114	10	15	29	10	25	50	10	19	44	7	18	43	5	5	7	10	25	50	10	17	42	1	1	2
Q03690	CLU1	NP_013725.1	YM8270.16	1277	10	25	45	10	25	50	10	25	38	7	22	40	3	6	11	10	15	27	10	20	44	3	6	11
P36041	EAP1	NP_012718.1;		632	10	17	22	10	25	50	10	23	37	7	20	34	6	13	13	10	25	50	10	25	50	0	0	5
P38337	SHG1	NP_009817.3	YBR1726	142	10	25	41	10	25	50	10	12	17	7	10	31	3	3	8	10	16	16	10	25	43	1	6	7
P53049	YOR1	NP_011797.3;		1477	10	25	50	10	25	50	10	15	22	7	17	25	6	6	26	10	25	50	10	21	46	0	2	4
P53267	DAM1	NP_011628.4;	G6153	343	10	25	38	10	25	50	10	22	37	7	12	17	5	7	14	10	25	38	10	25	50	2	2	3
P13586	PMR1	NP_011348.1;	G1666	950	10	17	30	10	25	50	10	23	26	7	12	13	6	6	6	10	23	30	10	15	20	0	0	2
P38853	KEL1	NP_012028.1		1164	6	21	46	10	25	50	10	23	48	7	22	47	2	14	29	10	25	50	10	25	50	2	5	8
Q08972	NEW1	NP_015098.1	P1445	1196	8	17	23	10	25	50	10	23	42	7	21	45	5	20	39	10	25	50	7	15	39	3	4	7
Q04311	VMS1	NP_010334.1		632	10	18	25	10	25	50	9	9	13	7	7	16	5	5	5	10	12	17	10	17	22	2	4	6
P36049	EBP2	NP_012749.1	YKL636	427	10	16	40	10	25	50	8	8	9	7	21	46	1	1	1	10	25	50	10	14	36	3	6	14
Q06070		NP_013511.4		228	10	16	26	10	25	50	8	8	8	7	9	20	6	6	13	10	12	22	10	11	24	3	6	9
P46949	FYV8	NP_011712.1;	G7589	817	10	25	35	10	25	50	7	7	19	7	15	40	3	7	25	10	25	50	10	25	50	2	2	5
P53168	DUO1	NP_011454.1;		247	10	14	26	10	25	50	10	14	34	6	6	27	6	6	30	10	12	35	10	21	46	0	1	3
P30771	NAM7	NP_013797.1;	YM9582.05C	971	10	21	24	10	25	50	10	25	47	6	20	25	6	18	18	10	25	29	10	25	44	0	0	0
Q04935	COX20	NP_010517.1;	YD9934.15c	205	10	25	37	10	25	50	10	25	45	6	21	24	5	11	20	10	25	28	10	25	25	0	2	4
P40573	MET28	NP_012282.3		187	10	22	22	10	25	50	10	12	12	6	16	23	2	2	2	10	15	15	10	12	16	3	4	4
P48563	MON2	NP_014102.1;	N0453	1636	10	16	33	10	25	50	10	23	31	6	12	18	7	7	7	10	25	38	10	25	39	0	0	3
P32489	MEI5	NP_015204.1;	LPH6C	222	10	22	46	10	25	50	10	11	17	6	8	17	2	2	15	10	10	10	10	10	10	1	2	8
Q07532	IWR1	NP_010168.4;		353	10	22	41	10	25	50	9	9	9	6	12	15	8	8	8	10	25	50	10	13	17	0	1	7
Q03016	GIP3	NP_015188.1		1276	10	25	50	10	25	50	6	14	39	6	21	46	6	12	37	10	25	50	10	25	50	0	4	5
P38805	RPF1	NP_011956.1		295	10	25	50	10	25	50	8	14	39	6	14	39	5	5	5	9	11	31	8	8	29	0	4	7
P36048	SNU114	NP_012748.1;	YKL637	1008	5	10	21	10	25	50	10	25	50	6	20	45	4	14	24	6	9	26	10	21	31	0	0	0
P53599	SSK2	NP_014428.1	N3276	1579	10	25	50	10	25	50	10	25	50	5	20	45	4	19	31	10	25	50	10	25	50	1	3	3
P34078	LTV1	NP_012779.1	YKL2	463	10	12	25	10	25	50	10	15	33	5	16	41	6	13	30	10	12	26	10	25	42	3	3	4
P40357	SEC9	NP_011523.3		651	10	24	41	10	25	50	10	23	25	5	20	35	1	4	4	10	21	26	10	23	35	4	5	11
P31109	SNC1	NP_009372.1;		117	10	25	44	10	25	50	10	25	35	5	20	25	7	9	9	10	25	29	10	20	20	0	1	2
P49687	NUP145	NP_011423.1;		1317	9	23	26	10	25	50	10	25	49	5	20	45	5	20	45	10	25	37	10	25	50	1	1	2
P36036	YRA2	NP_012708.1;		203	8	22	42	10	25	50	10	23	45	5	18	29	4	13	24	10	25	50	10	25	50	1	2	3
P38261	EXO84	NP_009660.1	YBR0831	753	7	22	47	10	25	50	10	25	50	5	20	45	1	6	31	10	25	50	10	25	50	2	6	13
Q12159	YRA1	NP_010669.1;	D9481.2 D9509.1	226	6	19	44	10	25	50	9	20	45	5	20	45	6	14	35	10	25	50	10	25	50	1	2	3
P32943	CLB6	NP_011623.3;	G5970	380	10	15	32	10	25	50	9	9	25	5	9	30	5	5	11	10	25	50	6	6	14	0	2	4
Q02199	NUP49	NP_011343.1;	G1648	472	7	10	10	10	25	50	8	8	31	5	15	40	6	21	46	10	25	50	10	25	50	1	1	1
P22204	DBF2	NP_011606.3;		572	6	12	28	10	25	50	9	13	38	5	17	42	5	16	37	9	11	34	10	25	50	2	2	3
Q02724	ULP1	NP_015305.1	LPB11C	621	10	25	39	10	25	50	10	10	10	4	6	12	4	14	28	10	12	13	10	23	34	1	3	3
Q3E705	EFG1	NP_076891.4	G9368 YGR272C	233	9	24	42	10	25	50	10	14	14	4	7	7	1	1	1	10	14	14	10	25	27	3	3	9
P43563	MOB2	NP_116618.1	YFL035C YFL035C-A	287	8	22	24	10	25	50	10	21	46	4	19	44	4	19	44	10	25	50	10	25	50	1	4	5
P53968	CRZ1	NP_014371.1;	N2760	678	6	14	26	10	25	50	10	25	43	4	19	44	7	22	47	10	25	50	10	25	50	0	1	1
P53165	SGF73	NP_011449.1		657	10	25	30	10	25	50	9	14	25	4	12	37	5	11	22	10	25	41	10	18	43	1	3	5
Q12285	MDY2	NP_014530.1;		212	10	19	40	10	25	50	9	9	9	4	4	5	6	6	20	10	12	12	10	10	10	0	2	7
P32432	SFP1	NP_013507.1;	L8084.4	683	6	12	12	10	25	50	8	8	13	4	19	36	6	6	27	10	23	48	10	25	50	0	0	0
P13393	SPT15	NP_011075.3		240	9	24	48	10	25	50	8	13	38	4	11	36	1	1	12	10	16	41	8	8	33	2	3	5
P33308	CSE2	NP_014407.3;	N2046	149	5	18	35	10	25	50	6	13	38	4	18	43	4	12	16	10	25	50	8	17	42	0	1	3
P32610	VMA8	NP_010863.1	SYGP-ORF11	256	10	25	44	10	25	50	10	11	11	4	4	4	5	5	5	7	7	7	7	7	7	0	3	7
P38781	RSC30	NP_011923.2		883	10	25	35	10	25	50	8	8	8	4	4	4	1	1	22	5	5	5	10	14	26	2	4	8
P39925	AFG3	NP_010933.1;		761	10	25	47	10	25	50	7	7	9	4	8	23	2	2	2	5	5	5	10	16	16	0	1	2
Q12241	VAM3	NP_014749.1;	YOR3220W	283	6	21	34	10	25	50	10	25	29	3	17	21	4	12	12	10	25	26	10	25	25	0	2	5
Q12377	RPN6	NP_010186.1;	D2381	434	10	10	28	10	25	50	10	10	21	3	7	18	4	4	4	10	25	50	8	8	28	1	2	4
P25644	PAT1	NP_010002.3;	YCR77C	796	10	18	18	10	25	50	9	20	43	3	16	41	6	17	27	10	25	32	10	25	50	0	1	1
Q06411	SPP382	NP_013528.1		708	10	25	41	10	25	50	9	9	19	3	5	30	7	9	34	10	22	33	10	25	50	2	4	5
P38798	NMD2	NP_011944.2		1089	10	25	48	10	25	50	9	9	9	3	3	3	3	3	3	10	11	11	8	8	8	2	3	11
Q04003	SAS4	NP_010467.1;	YD9395.15C	481	10	20	45	10	25	50	8	8	8	3	12	19	2	2	2	10	16	16	10	17	19	0	1	4
Q05881		NP_013389.1;		355	10	18	42	10	25	50	8	8	10	3	3	7	8	8	12	10	11	23	10	10	10	1	2	7
P53858	BNI4	NP_014166.1;	N1146	892	9	22	33	10	25	50	8	8	8	3	3	4	8	8	8	10	25	35	10	24	30	1	1	2
Q06675	MCM21	NP_010604.4;		368	8	16	28	10	25	50	8	8	10	3	6	25	5	5	5	10	25	43	6	6	18	0	0	6
P53953	SFB2	NP_014349.1;	N2505 YNL2505C	876	10	14	14	10	25	50	9	9	9	3	3	12	3	3	3	9	9	9	10	15	15	2	2	2
P69850	DAD3	NP_631876.1		94	9	9	25	10	25	50	9	9	24	3	3	21	3	3	3	9	9	20	8	8	21	0	3	4
O13539	THP2	NP_012037.1;		261	7	7	7	10	25	50	10	10	10	3	8	9	3	3	3	8	14	14	7	7	7	1	1	1
P50090	KEL2	NP_011754.3;	G8585	882	10	25	41	10	25	50	9	12	24	3	7	25	3	13	26	7	7	7	10	16	30	2	2	2
Q02205	MEH1	NP_012932.1;	YK106	184	7	8	14	10	25	50	9	17	41	3	17	42	4	4	11	3	3	9	3	14	38	0	0	1
P05737	RPL7A	NP_011439.1		244	10	20	33	10	25	50	10	24	29	2	17	23	2	2	2	10	25	27	10	22	22	1	5	8
Q00816	REG1	NP_010311.1;	YD9813.06C	1014	8	23	41	10	25	50	10	19	44	2	17	42	4	5	28	10	25	50	10	25	50	0	2	4
P40343	VPS27	NP_014403.3;	N2038	622	5	16	35	10	25	50	10	15	15	2	8	8	7	12	13	10	13	13	9	19	19	0	0	1
P39008	POP2	NP_014450.3;	N3470	433	6	6	15	10	25	50	9	18	41	2	12	37	3	3	4	10	15	21	10	19	44	0	0	1
Q07949	PSR2	NP_013119.1;		397	5	20	45	10	25	50	9	22	47	2	17	42	2	13	29	10	25	50	10	25	50	0	1	5
P32641	RAD24	NP_011100.1;	SYGP-ORF60	659	10	19	43	10	25	50	9	10	34	2	2	22	7	9	20	10	25	50	9	13	38	1	2	4
Q08491	SKI7	NP_014719.1	YOR29-27	747	3	15	39	10	25	50	9	17	41	2	14	39	1	1	1	10	25	50	5	20	45	1	3	7
P38257	MMS4	NP_009656.2;	YBR0826 YBR0829 YBR100W	691	6	21	24	10	25	50	9	13	27	2	5	18	4	4	4	10	15	15	0	0	3	1	1	2
P31111	ZIP1	NP_010571.1;	D9819.9	875	10	19	41	10	25	50	8	8	9	2	4	24	5	9	20	10	13	13	10	17	31	0	2	2
P18851	STE4	NP_014855.3;	YOR50-2	423	7	14	14	10	25	50	8	8	10	2	3	15	4	4	4	10	24	24	10	16	16	0	0	2
P07278	BCY1	NP_012231.1;		416	7	7	9	10	25	50	8	8	8	2	7	11	4	4	4	10	22	22	10	11	14	1	1	3
Q06639	RSC3	NP_010589.3	D9740.13	885	10	25	29	10	25	50	7	7	7	2	2	2	2	2	25	10	10	10	10	12	18	3	5	8
P40014	SPC25	NP_010934.3;		221	8	11	11	10	25	50	7	7	12	2	9	24	4	4	4	10	16	16	10	18	28	0	1	1
P48836	VMA10	NP_011905.1	YHR039BC YHR039C-B	114	6	8	28	10	25	50	10	10	10	2	2	4	4	4	4	6	6	6	6	6	12	1	4	10
P05986	TPK3	NP_012755.1;	YKL630	398	9	19	33	10	25	50	9	20	44	2	17	42	5	9	21	4	4	4	9	9	16	0	2	2
P08539	GPA1	NP_011868.1;		472	10	21	30	10	25	50	10	17	17	1	2	4	5	12	12	10	25	27	10	13	13	0	1	4
Q06697	CDC73	NP_013522.1		393	7	21	37	10	25	50	10	18	39	1	11	32	3	5	15	10	25	29	10	25	43	0	3	4
P40361		NP_012465.3;	HRD888 J1095	888	10	25	49	10	25	50	10	23	45	1	16	37	2	2	7	10	25	42	9	18	36	0	2	5
Q06678	MRPL35	NP_010608.1;	D9798.5	367	8	22	38	10	25	50	10	10	10	1	1	1	3	7	7	10	25	42	7	10	14	1	2	6
P53201	SWC4	NP_011516.1;		476	7	22	37	10	25	50	10	25	48	1	14	37	5	14	25	10	25	40	7	21	37	0	2	3
P47006	RPA34	NP_012387.1;	J0637	233	10	23	35	10	25	50	9	9	10	1	1	3	5	15	28	10	20	20	10	17	28	2	2	10
P38623	RCK2	NP_013349.1	L9672.6	610	9	24	49	10	25	50	9	22	46	1	16	41	1	4	25	10	25	50	10	25	50	4	7	12
P38181	NUP170	NP_009474.1;	YBL0725	1502	8	18	22	10	25	50	8	19	44	1	16	41	5	20	26	10	25	50	10	25	50	0	0	1
P53941	IMP4	NP_014324.3;	N2353	290	8	16	31	10	25	50	8	8	18	1	2	14	0	0	0	10	25	50	7	7	19	0	1	5
P06787	CMD1	NP_009667.1;	YBR0904	147	5	12	12	10	25	50	8	8	8	1	1	1	4	7	10	10	10	10	7	10	13	0	2	2
P01097	INH1	NP_010100.1;	D1305	85	5	11	32	10	25	50	8	11	26	1	8	24	4	7	19	10	18	28	3	7	21	0	0	1
P46674	SAC3	NP_010443.3;	YD8358.13	1301	8	12	12	10	25	50	7	7	16	1	11	30	7	22	40	10	25	50	10	25	49	0	1	3
Q08208	NOP12	NP_014601.1		459	8	18	43	10	25	50	7	7	13	1	3	18	6	7	11	10	25	50	10	13	26	0	3	8
P14736	RAD4	NP_011089.4		754	6	16	41	10	25	50	7	10	35	1	6	31	3	3	6	10	24	43	7	10	35	1	4	9
P38523	MGE1	NP_014875.3;	O5099	228	10	25	46	10	25	50	7	7	12	1	7	20	2	8	15	10	11	25	4	13	18	0	1	3
P35169	TOR1	NP_012600.1	J1803	2470	6	11	11	10	25	50	10	11	12	1	2	12	1	5	19	9	9	9	5	15	30	1	3	4
Q12514	NOT5	NP_015397.1	YP9499.27	560	7	7	21	10	25	50	7	7	24	1	1	19	2	2	13	9	9	29	10	10	25	1	5	8
Q06604	BSP1	NP_015497.1		576	10	21	41	10	25	50	7	8	30	1	3	28	3	5	22	9	9	31	6	12	37	1	3	4
Q99176	SRN2	NP_013220.1	L2958 L9233.5	213	10	25	48	10	25	50	10	12	19	1	1	11	1	1	16	6	6	6	4	6	12	4	6	9
Q03231		NP_013906.1;	YM8010.11C	154	2	2	2	10	25	50	7	7	14	1	1	11	2	2	23	6	6	6	4	4	20	1	1	2
Q05050	EIS1	NP_013744.1;	YM9973.04C	843	10	25	50	10	25	50	10	22	47	0	14	39	3	16	22	10	25	50	10	25	50	0	1	7
P36534	MRPL40	NP_015152.1;		297	10	17	41	10	25	50	10	21	26	0	6	9	6	12	14	10	10	10	10	25	27	0	2	7
P38229	GIP1	NP_009601.2	YBR0420	639	10	22	35	10	25	50	10	10	10	0	0	0	2	2	11	10	10	10	10	10	19	1	3	4
P53246	ENV11	NP_011585.3;		860	9	18	38	10	25	50	10	20	45	0	7	32	6	10	18	10	25	47	10	25	46	0	0	0
P06245	TPK2	NP_015121.1;		380	7	14	14	10	25	50	10	17	42	0	4	27	2	2	2	10	25	50	10	10	21	0	0	0
Q12315	GLE1	NP_010074.1;	D1049	538	8	21	46	10	25	50	10	23	39	0	11	29	3	17	36	10	25	39	4	11	26	0	0	2
P39743	RVS167	NP_010676.1	D9509.8	482	10	25	38	10	25	50	9	18	38	0	11	35	3	3	3	10	25	50	10	25	37	2	4	6
Q06673	ECM30	NP_013540.1;		1274	10	13	32	10	25	50	9	12	28	0	0	12	9	10	30	10	25	47	10	17	37	1	1	1
Q12038	SRO7	NP_015357.1	YP9367.12	1033	9	22	47	10	25	50	9	16	29	0	7	23	3	7	14	10	25	50	10	20	45	3	5	11
P40510	SER33	NP_012191.1;		469	4	9	32	10	25	50	9	19	32	0	5	15	4	14	22	10	12	12	10	25	48	0	0	2
Q04659	CSM3	NP_013763.1;	YM9796.01	317	3	18	42	10	25	50	9	20	35	0	5	12	4	19	30	10	25	46	10	25	38	0	1	2
P38835		NP_011999.2;		850	9	24	35	10	25	50	9	17	24	0	7	10	4	10	13	10	25	41	6	10	19	1	2	2
P25605	ILV6	NP_009918.1;	YCL9C	309	10	22	30	10	25	50	8	8	22	0	0	18	3	3	12	10	11	11	10	10	33	0	0	1
Q07844	RIX7	NP_013066.1		837	10	20	43	10	25	50	8	8	22	0	0	16	4	4	10	10	20	45	10	19	41	4	5	7
Q01163	RSM23	NP_011386.2;	G2856	450	10	21	46	10	25	50	8	13	27	0	3	14	3	3	18	10	25	50	10	20	45	0	1	6
Q07350	PRP11	NP_010241.1;	D2711	266	9	20	37	10	25	50	8	9	12	0	7	13	4	11	11	10	21	21	10	24	42	2	2	5
P47128	EAF6	NP_012615.3	J1854	113	6	16	20	10	25	50	8	12	37	0	14	39	3	3	10	10	25	50	6	11	26	1	4	5
Q06338	BCP1	NP_010648.3		283	10	25	44	10	25	50	8	18	43	0	14	33	2	2	6	10	25	49	5	20	40	2	4	4
P20457	PRI2	NP_012879.1	YKL258	528	10	24	41	10	25	50	8	8	8	0	0	0	1	1	1	10	18	24	4	4	7	1	3	5
P53830	CUS2	NP_014113.1	N0549	285	9	24	49	10	25	50	8	8	9	0	0	6	4	4	8	10	25	29	4	4	16	1	6	9
P13902	INO4	NP_014533.1	HRF151	151	9	22	47	10	25	50	8	8	12	0	0	6	5	5	5	10	25	36	3	3	11	1	3	9
P39904	VPS52	NP_010772.1	D8035.27	641	8	23	41	10	25	50	8	15	27	0	8	13	2	4	22	10	25	42	0	4	18	1	4	8
P09064	SUI3	NP_015087.1		285	9	24	49	10	25	50	7	7	7	0	0	17	5	5	21	10	25	50	10	12	30	0	7	11
P32473	PDB1	NP_009780.1;	YBR1511	366	9	24	36	10	25	50	7	7	7	0	0	0	4	4	4	10	11	11	10	10	10	0	0	1
Q07800	PSR1	NP_013091.1;	L1341	427	6	21	46	10	25	50	7	14	39	0	12	37	3	4	10	10	25	50	10	25	50	0	0	3
P54791	ORC4	NP_015488.1;	P9325.5	529	10	25	44	10	25	50	7	7	7	0	0	2	5	5	16	10	12	12	8	8	21	0	1	5
P38810	SFB3	NP_011966.1;		929	2	17	41	10	25	50	7	11	36	0	12	37	4	9	31	10	25	45	7	21	46	0	0	2
P23642	VAN1	NP_013592.1	YM8339.04C	535	3	14	39	10	25	50	7	12	37	0	0	24	5	12	37	10	25	48	5	16	39	0	3	7
P36013	MAE1	NP_012896.1;		669	9	24	49	10	25	50	7	8	28	0	2	19	3	3	3	10	25	50	3	8	28	0	0	1
P33411	PRP18	NP_011520.2		251	6	21	41	10	25	50	7	14	39	0	11	36	3	6	17	10	25	50	2	6	31	1	6	7
P32497	NIP1	NP_014040.1;	YM9924.01C YM9952.11C	812	10	22	34	10	25	50	6	13	38	0	11	36	4	4	6	10	25	50	10	25	50	0	0	0
P32892	DRS1	NP_013093.1;	L1345	752	10	25	50	10	25	50	6	8	22	0	5	30	5	16	21	10	25	50	10	25	50	2	2	11
P53112	PEX14	NP_011362.3	G1870	341	10	25	47	10	25	50	6	6	6	0	0	0	4	4	4	10	10	10	6	6	6	2	4	9
P47169	MET5	NP_116579.1;	J2126	1442	8	17	24	10	25	50	6	6	6	0	0	0	6	6	12	10	13	13	4	4	14	0	1	3
Q12329	HSP42	NP_010456.1;	YD9395.04	375	8	13	20	10	25	50	6	12	37	0	12	37	4	9	34	10	25	50	3	11	36	0	0	0
Q04338	VTI1	NP_013924.1;	YM9646.10C	217	4	6	14	10	25	50	6	11	28	0	9	26	5	5	5	10	25	29	3	3	10	0	2	3
P34233	ASH1	NP_012736.1;		588	5	13	18	10	25	50	5	5	5	0	1	8	4	17	35	10	25	25	10	23	38	1	1	1
Q02776	TIM50	NP_015262.1;		476	8	23	40	10	25	50	5	5	5	0	4	4	3	3	3	10	18	43	3	3	9	0	0	3
P46963	CTK3	NP_013595.1	YM8339.07	296	2	6	25	10	25	50	4	5	26	0	1	16	2	2	20	10	25	44	4	7	28	0	3	4
P21374	ISY1	NP_012584.3;	J1657	235	10	21	46	10	25	50	10	10	15	0	3	14	6	6	6	9	17	19	9	16	23	1	1	6
P25296	CNB1	NP_012731.1;		175	10	22	43	10	25	50	8	8	9	0	0	2	5	5	20	9	9	9	9	9	24	1	1	4
P89114	SAE3	NP_011947.2		91	9	13	27	10	25	50	8	9	14	0	0	9	3	3	3	9	9	15	0	0	4	2	3	10
P40969	CEP3	NP_013891.1	YM8520.17C	608	10	25	46	10	25	50	7	7	7	0	0	0	5	5	15	9	9	9	10	13	13	2	4	7
Q00539	NAM8	NP_011954.1;		523	10	20	29	10	25	50	10	24	31	0	12	30	5	20	34	8	16	26	10	25	50	1	1	1
P34730	BMH2	NP_010384.3;	YD8557.08	273	10	10	17	10	25	50	8	8	8	0	1	4	4	4	4	8	8	8	9	9	18	0	1	3
P53732	MRPS12	NP_014434.1;	N3298	153	9	20	38	10	25	50	7	7	30	0	2	27	4	4	18	8	8	25	8	8	15	0	0	3
Q12468	RRI1	NP_010065.2	D0888	440	8	17	21	10	25	50	7	7	9	0	0	0	4	4	4	8	8	8	6	6	8	2	3	4
P40577	MND2	NP_012291.1;		368	9	24	49	10	25	50	6	10	22	0	5	17	2	2	7	8	18	19	3	11	11	0	2	4
P07251	ATP1	NP_009453.2;	YBL0827	545	5	15	32	10	25	50	6	6	6	0	0	2	3	3	3	8	16	35	3	3	3	0	1	2
P43616	DUG1	NP_116702.1		481	7	7	19	10	25	50	5	5	5	0	0	0	4	4	4	8	8	8	6	6	13	1	3	6
P39729	RBG1	NP_009364.1		369	5	14	25	10	25	50	9	9	9	0	3	3	3	3	9	7	7	16	3	4	12	2	4	7
Q01080	RPA49	NP_014151.1;	N0880	415	9	24	48	10	25	50	7	7	7	0	0	0	3	3	7	7	7	7	10	10	12	1	1	7
P32902	MRP4	NP_011859.1;		394	9	24	38	10	25	50	6	6	20	0	1	18	1	1	12	7	14	28	3	4	19	0	1	2
P35719	MRP8	NP_012780.1	YKL3	219	5	5	19	10	25	50	6	6	6	0	0	0	2	2	2	7	7	7	3	3	3	1	3	7
P38708		NP_011884.1		688	2	11	25	10	25	50	6	6	6	0	1	1	2	2	6	7	7	7	3	3	10	1	3	6
Q08119	ESC8	NP_014625.1		714	10	25	46	10	25	50	4	10	20	0	10	20	3	3	3	7	14	19	0	5	16	0	4	7
P36104	SWD2	NP_012907.3		329	10	25	25	10	25	50	7	7	8	0	0	0	7	10	29	6	6	6	5	5	5	1	5	5
P38336	POP4	NP_009816.1	YBR1725	279	10	25	31	10	25	50	6	6	13	0	0	2	5	9	9	6	6	19	4	4	4	1	3	3
Q12508	RMD5	NP_010541.3;	YD9320A.05c	421	5	12	12	10	25	50	6	6	8	0	0	1	5	5	5	6	6	6	4	4	4	0	1	7
P0CX28	RPL42B	NP_012010.1;NP_014237.2		106	10	25	44	10	25	50	8	11	28	0	3	12	5	5	11	5	5	5	7	7	18	2	6	10
P0CX27	RPL42A	NP_012010.1;NP_014237.2	N1722	106	10	25	44	10	25	50	8	11	28	0	3	12	5	5	11	5	5	5	7	7	18	2	6	10
P53959	COG6	NP_014357.1;	N2675	839	4	18	27	10	25	50	7	19	43	0	15	39	3	12	23	5	20	38	0	13	33	0	0	2
P53163	MNP1	NP_011447.1;		194	7	22	47	10	25	50	4	4	16	0	0	17	3	3	18	5	5	10	0	0	18	1	2	3
P38300	MBA1	NP_009744.3;	YBR1307	278	9	24	49	10	25	50	1	1	15	0	0	12	3	3	4	5	5	25	5	5	25	0	1	7
P36095	VPS24	NP_012883.1	YKL254	224	10	22	42	10	25	50	10	17	17	0	11	16	3	3	3	4	4	4	6	6	6	2	4	8
P36519	MRPL7	NP_010523.3;	YD8419.04	292	10	25	48	10	25	50	6	6	6	0	0	1	2	2	4	4	4	4	4	4	18	0	2	8
P36108	DID4	NP_012924.2		232	10	23	41	10	25	50	6	11	12	0	9	22	2	2	2	4	17	29	0	0	0	1	3	8
P33421	SDH3	NP_012781.1	YKL4	198	3	3	13	10	25	50	5	5	5	0	0	0	2	2	2	4	4	4	10	11	11	1	3	4
P23369	MRPL25	NP_011590.1		157	6	6	20	10	25	50	4	4	9	0	0	2	3	6	28	4	4	4	5	7	31	1	4	6
P53277	SYF2	NP_011645.3		215	8	23	48	10	25	50	4	4	12	0	0	24	2	2	2	4	4	11	0	0	16	3	7	8
P04386	GAL4	NP_015076.1		881	9	23	48	10	25	50	3	3	3	0	0	1	2	2	5	4	4	4	6	6	10	1	6	11
Q04598		NP_010400.1;	YD9727.10	105	9	17	26	10	25	50	6	6	7	0	0	0	3	3	19	3	3	3	0	0	1	0	0	1
P02381	VAR1	NP_009320.1		398	2	2	2	10	25	50	3	3	4	0	1	1	1	4	4	2	2	2	0	0	5	2	3	8
Q06337	EAF1	NP_010646.4;		982	10	25	38	10	25	49	10	25	30	10	25	31	7	22	24	10	25	34	10	25	38	0	1	3
P0CX29	RPS23A	NP_011633.3;NP_015457.1	G6178	145	10	25	44	10	25	49	10	23	23	10	21	21	6	6	18	10	16	16	10	19	33	2	3	7
P0CX30	RPS23B	NP_011633.3;NP_015457.1	P9659.9	145	10	25	44	10	25	49	10	23	23	10	21	21	6	6	18	10	16	16	10	19	33	2	3	7
Q12107	APC9	NP_013203.1		265	10	25	50	10	25	49	10	22	29	10	14	19	7	22	30	10	13	13	10	23	29	2	3	5
Q08932	RSA1	NP_015131.1;		381	9	24	39	10	25	49	10	25	39	10	25	45	5	20	28	10	25	46	10	25	48	1	2	5
P06782	SNF1	NP_010765.3;	D8035.20	633	5	5	5	10	25	49	10	25	47	10	25	46	8	23	46	10	25	50	10	25	50	0	0	1
P14724	CDC26	NP_116694.1;		124	10	16	24	10	24	49	9	9	17	10	25	49	3	3	13	10	25	50	5	5	16	0	0	5
P32325	DBF4	NP_010337.3	D4205 YD9609.07C	704	10	22	31	9	24	49	10	21	27	10	25	50	3	8	22	9	9	10	4	4	4	1	3	3
P53900	GIM3	NP_014246.1;	N1761	129	10	19	21	10	25	49	10	14	14	9	15	15	4	4	4	10	18	18	10	12	12	0	1	4
P32367	TFC1	NP_009681.3;	YBR0919	649	7	18	28	10	25	49	10	19	19	9	19	20	3	13	13	10	25	26	10	21	21	0	0	1
P39078	CCT4	NP_010138.1		528	10	20	34	10	25	49	10	17	19	8	15	16	6	6	11	10	21	21	10	17	22	1	5	8
P04147	PAB1	NP_011092.1;		577	8	23	34	10	25	49	10	25	35	4	19	27	4	4	4	10	25	50	7	16	29	1	2	2
P52960	PIP2	NP_015008.3;		996	10	22	42	10	25	49	9	11	11	2	2	2	5	5	8	10	16	16	10	18	18	0	2	7
Q12250	RPN5	NP_010134.1	D1572	445	10	20	27	10	25	49	9	9	9	2	2	2	5	5	5	10	25	40	10	10	11	2	4	6
Q04477	SPC24	NP_013835.1;	YM9718.16C	213	10	17	32	10	24	49	8	8	8	2	2	4	6	6	6	9	9	9	10	10	13	1	2	5
P0CX43	RPL1A	NP_011380.3;NP_015104.1		217	10	19	43	10	25	49	8	8	8	2	4	6	4	4	13	9	9	9	9	9	18	1	5	7
P0CX44	RPL1B	NP_011380.3;NP_015104.1	G2834	217	10	19	43	10	25	49	8	8	8	2	4	6	4	4	13	9	9	9	9	9	18	1	5	7
P47118	YAE1	NP_012601.1;	J1805	141	10	25	40	9	24	49	9	14	15	1	7	7	5	5	7	10	25	47	10	19	31	0	1	4
Q12050	ELG1	NP_014787.3	O3510 YOR3510C	791	10	25	47	10	25	49	9	9	15	1	8	24	3	3	12	10	25	42	9	9	13	1	3	4
P80235	YAT1	NP_009420.1;		687	10	19	41	10	25	49	9	9	13	1	7	20	5	5	5	10	11	21	8	10	19	1	1	1
Q04545	TDA9	NP_013630.1;		1251	10	24	46	10	24	49	9	10	19	0	0	8	5	9	23	10	13	13	10	25	37	1	2	5
Q03406	SLD5	NP_010777.3;		294	4	18	43	9	24	49	8	12	21	0	8	24	4	5	15	10	25	40	4	4	10	0	2	3
Q12421	ATG31	NP_010305.1	PZD196 YD9335.08c	196	10	24	42	10	25	49	8	16	35	0	9	29	4	10	32	10	25	45	0	6	27	1	4	5
P40091	PEA2	NP_011076.1;		420	10	20	30	9	24	49	5	5	11	0	0	9	2	2	15	10	11	23	10	13	27	1	1	3
P29311	BMH1	NP_011104.3;		267	10	10	18	10	25	49	8	8	8	0	1	4	5	5	5	8	8	8	7	7	15	0	1	3
P36000	APL2	NP_012787.1		726	4	18	32	10	25	49	8	8	8	0	0	0	3	3	3	8	8	8	3	3	3	3	6	9
P32844	SEC6	NP_012196.1;		805	6	15	35	10	24	49	7	7	7	0	0	0	4	4	4	7	7	7	6	6	6	0	2	6
P32628	RAD23	NP_010877.3	SYGP-ORF29	398	10	25	37	10	25	49	6	6	6	0	9	13	3	3	3	4	4	4	0	0	0	3	4	8
P40159		NP_014191.2;	N1338	199	10	12	12	10	25	48	10	25	46	10	25	50	6	20	43	10	25	50	10	25	50	0	0	0
P48240	MTR3	NP_011674.3;	G6676	250	10	25	40	10	25	48	10	25	50	10	25	47	2	2	17	10	25	47	10	25	47	0	1	4
P40413	CCT5	NP_012598.1;	J1752	562	10	13	19	10	25	48	10	21	33	10	18	27	3	6	6	10	13	14	10	20	27	0	0	5
Q04053	SNX41	NP_010713.1;		625	5	16	16	8	23	48	10	25	50	10	25	50	2	10	26	10	25	50	10	25	50	0	0	0
P38829		NP_011990.1;		231	10	25	33	10	25	48	10	22	22	9	24	31	6	6	6	10	25	44	10	25	26	0	2	3
P18410	SPO7	NP_009393.1;		259	9	24	48	10	25	48	10	25	40	9	19	30	6	21	34	10	25	50	10	25	46	0	0	2
P40045	TDA2	NP_010994.3;		126	10	19	37	10	25	48	10	19	19	7	9	10	4	11	11	10	17	17	10	19	19	1	2	3
P40314	BTT1	NP_010538.1	YD9320A.02	149	6	21	35	10	25	48	10	20	39	4	13	38	2	2	15	10	24	39	0	0	0	2	5	10
P38877	CTF8	NP_012061.3;		133	9	24	25	10	25	48	10	11	16	3	5	8	5	5	6	10	23	23	5	5	7	0	2	3
P04456	RPL25	NP_014514.1		142	10	25	50	10	25	48	9	10	10	1	2	3	3	3	3	10	25	28	7	7	7	2	7	11
P40970	LCB2	NP_010347.1;	D4246 YD9609.16	561	10	19	26	9	23	48	10	25	44	1	8	9	5	6	31	8	11	21	9	12	33	0	1	3
P25558	BUD3	NP_009914.2	YCL012W YCL013W YCL12W YCL13W YCL14W	1636	9	24	44	10	25	48	10	11	11	0	0	0	5	5	20	10	18	18	10	19	33	1	5	7
Q02642	EGD1	NP_015288.1		157	4	18	35	10	25	48	10	22	38	0	9	28	2	3	16	10	25	45	3	10	27	2	5	10
P41810	SEC26	NP_010524.3;	YD8419.05C	973	10	22	31	10	25	48	9	10	18	0	1	7	5	18	18	10	25	39	10	15	21	0	0	4
P53115	INO80	NP_011365.1	G1880	1489	7	22	44	10	25	48	7	9	20	0	6	13	2	2	2	10	25	31	10	25	30	1	4	8
P17558	PET123	NP_014801.1		318	10	25	44	10	25	48	7	9	20	0	3	19	3	5	19	7	7	7	10	14	25	3	4	10
P02406	RPL28	NP_011412.1		149	10	25	38	10	25	47	10	25	44	10	25	41	4	15	40	10	25	31	10	25	50	2	4	6
P02294	HTB2	NP_009553.1	YBL0104	131	10	25	42	10	25	47	10	25	34	10	25	33	3	3	3	10	25	39	10	25	50	2	7	13
P13434	HAP3	NP_009532.1;	YBL0441	144	10	25	27	10	25	47	10	25	37	10	25	32	6	21	23	10	25	40	10	25	37	0	0	0
P34218	SAS3	NP_009501.1	YBL0507 YBL0515	831	10	14	38	10	25	47	10	16	16	10	18	31	7	10	10	10	16	18	10	17	25	1	4	4
P33442	RPS1A	NP_013546.1	L9753.9	255	10	25	49	10	25	47	10	20	20	10	17	18	4	4	4	10	21	21	10	21	21	3	7	11
P46958	IDS2	NP_012389.1;	J0642	469	9	12	30	10	22	47	10	11	25	10	24	48	4	4	25	10	25	50	10	25	50	0	1	1
P38061	RPL32	NP_009460.1	YBL0838	130	10	25	50	10	25	47	10	25	34	10	25	32	3	3	3	10	15	15	8	8	8	2	6	8
P36118	NTR2	NP_012947.1		322	10	22	36	10	25	47	10	25	41	8	23	45	1	15	26	10	25	36	10	25	45	3	3	5
P36006	MYO3	NP_012793.2		1272	10	25	50	10	25	47	10	22	23	2	7	7	1	1	1	10	25	25	10	15	15	3	9	13
P57744	TIM8	NP_058168.1;	YJR135BW	87	10	18	25	10	25	47	10	10	10	0	0	0	6	6	6	10	20	20	10	19	19	0	2	6
P38792	RRP4	NP_011936.1;		359	7	21	29	7	22	47	8	10	35	0	8	32	3	14	21	10	25	43	2	14	34	1	1	2
P38187	UBP13	NP_009486.3	YBL0621	747	10	23	40	7	22	47	8	8	13	0	2	6	2	2	12	10	11	18	0	0	14	1	5	7
P40507	AIR1	NP_012186.1;		360	7	22	40	10	25	47	7	11	19	0	5	10	5	15	21	10	25	32	10	25	34	0	1	2
P42900	SLS1	NP_013240.1	L3162	643	5	15	30	8	22	47	5	7	26	0	6	22	1	11	19	10	25	50	5	16	37	3	3	8
P36147	PAM17	NP_012991.3;		197	8	17	35	10	25	47	4	4	4	0	0	0	5	5	5	10	11	11	3	3	3	0	0	0
P23287	CNA1	NP_013537.1	L9753.6	553	10	25	50	10	25	47	9	9	10	0	0	1	5	5	5	9	9	9	8	8	13	2	6	9
Q01217	ARG5,6	NP_010992.1		863	7	14	33	10	25	47	7	7	7	0	0	0	6	6	6	8	8	8	4	4	4	1	3	6
P13517	CAP2	NP_012230.3;		287	3	3	6	10	22	47	5	5	6	0	0	3	3	3	5	7	7	9	4	4	12	0	0	1
P32605	MUD1	NP_009677.1;	YBR0915	298	10	15	15	7	22	47	8	8	8	0	4	10	4	6	21	5	5	5	10	15	15	0	2	4
P38830	NDT80	NP_011992.1;		627	10	17	42	10	25	46	10	25	38	10	23	35	5	5	7	10	25	28	10	16	21	0	1	2
P53965	SIW14	NP_014366.3	N2746	281	10	22	22	10	25	46	10	21	21	10	21	22	3	12	18	10	20	20	10	24	28	1	3	5
O13516	RPS9A	NP_015244.1;		197	10	23	41	10	25	46	10	16	16	10	16	16	4	12	12	10	22	22	10	13	13	1	2	7
P05755	RPS9B	NP_009748.3;	YBR1317	195	10	23	41	10	25	46	10	16	16	10	16	16	4	12	12	10	22	22	10	17	17	1	2	6
P23394	PRP28	NP_010529.3	YD8419.10C	588	8	21	46	6	21	46	8	12	37	9	24	49	3	10	13	10	25	50	7	18	37	0	3	8
P25337	BUD31	NP_009990.1	YCR63W YCR903	157	10	24	24	10	25	46	10	20	25	8	9	9	3	11	11	10	25	38	10	12	19	2	4	8
P43592	FAR7	NP_116663.1;		221	2	2	2	10	25	46	10	16	17	7	20	21	4	4	4	10	22	22	8	23	28	0	0	2
P38065	APL3	NP_009516.1	YBL0412	1025	8	16	16	10	22	46	9	9	9	3	3	3	5	10	10	10	18	18	8	11	11	2	3	6
Q08235	BRX1	NP_014565.2		291	9	24	36	10	25	46	10	25	27	2	16	16	4	7	7	10	24	24	10	20	24	2	7	8
Q06616		NP_015500.1		221	10	25	41	10	25	46	9	17	37	1	9	26	3	3	3	9	9	9	10	10	32	1	3	7
P52871	SBH2	NP_010936.1	YER019BC	88	10	18	35	10	25	46	10	25	39	0	12	22	5	5	17	10	25	45	8	14	37	0	3	5
P25336	MSH3	NP_010016.2	YCR1152 YCR92C	1018	10	16	25	8	21	46	9	9	20	0	8	33	4	4	10	10	25	50	7	7	20	0	4	4
P40066	GLE2	NP_011033.3;		365	10	18	18	10	25	46	8	9	9	0	5	8	7	7	7	10	25	34	10	25	44	0	1	1
P53220	TIM21	NP_011547.3;		239	9	24	45	10	22	46	8	8	12	0	0	4	5	5	13	10	16	31	10	15	27	0	1	1
P32799	COX13	NP_011324.1;	G1341	129	6	19	27	10	25	46	8	14	14	0	1	3	0	13	14	10	17	17	1	15	17	1	2	7
P53146	USE1	NP_011417.1;		245	10	19	33	10	25	46	7	7	8	0	0	11	5	5	5	10	16	16	8	8	19	0	1	4
P0CX84	RPL35A	NP_010090.1;NP_010145.1	D1249	120	10	17	34	10	25	46	7	7	7	0	0	0	1	1	1	10	15	15	3	3	9	1	5	10
P0CX85	RPL35B	NP_010090.1;NP_010145.1	D2170	120	10	17	34	10	25	46	7	7	7	0	0	0	1	1	1	10	15	15	3	3	9	1	5	10
P53847	DSL1	NP_014141.1	N0842	754	7	19	33	10	25	46	6	6	6	0	0	0	4	6	14	10	25	39	9	11	25	1	3	4
P35845	SWH1	NP_009421.3	YAR044W	1188	10	11	11	10	25	46	6	6	6	0	0	0	4	4	4	9	9	9	9	9	9	0	3	5
P47074	MAD3	NP_012521.3	J1341	515	8	18	18	10	25	46	9	11	11	0	0	0	2	6	6	6	6	6	10	18	18	3	3	6
P33204	ARC19	NP_012912.1;	YKL166	171	7	9	27	9	21	46	5	5	18	0	0	9	5	5	5	6	6	6	7	7	22	0	0	0
P06208	LEU4	NP_014295.1 [P06208-1];	N2173	619	2	14	33	6	21	46	4	4	14	0	0	6	1	1	18	5	5	5	3	3	21	1	2	8
P53295	RBG2	NP_011689.1		368	6	15	23	10	25	46	7	9	9	0	7	7	2	2	9	4	4	13	0	8	17	2	4	6
Q03761	TAF12	NP_010429.1;	YD8358.02	539	10	16	16	10	25	45	10	25	33	10	25	50	7	19	19	10	25	37	10	25	39	0	0	1
P27637	BUD14	NP_009408.3;	FUN2	709	10	20	24	10	25	45	10	22	22	10	25	49	3	3	15	10	19	20	10	25	50	1	2	2
P25588	MRC1	NP_009871.2	YCL61C/YCL60C	1096	6	20	35	10	22	45	7	7	28	10	22	47	5	5	27	10	19	35	10	25	50	0	4	4
P36167	SRL3	NP_013017.2;	YKR411	246	10	18	31	10	20	45	9	9	12	8	22	42	5	5	5	10	12	18	10	15	38	1	2	4
Q12208	USB1	NP_013233.1;	L3127	290	10	25	42	10	25	45	10	25	28	2	17	18	5	14	14	10	25	37	10	25	43	0	1	3
Q00711	SDH1	NP_012774.1	YKL602	640	6	18	33	10	25	45	5	5	6	0	0	3	4	4	12	10	25	40	7	7	22	3	3	4
P49334	TOM22	NP_014268.1;	N1217 N1862	152	10	21	40	7	20	45	9	14	38	0	3	25	4	4	18	9	16	39	0	0	23	1	1	2
Q08920	CBC2	NP_015147.1;		208	10	25	47	10	25	45	8	11	18	0	0	2	2	2	2	9	9	9	10	18	18	1	2	4
Q02486	ABF2	NP_013788.1;	YM9916.11	183	6	14	25	10	25	45	7	7	14	0	0	6	6	6	6	6	6	6	4	4	14	0	1	5
P40096	BUR6	NP_011086.3;		142	10	19	19	10	25	44	10	25	48	10	25	48	4	19	37	10	25	34	10	25	50	0	1	2
P53297	PBP1	NP_011694.3		722	10	25	35	10	25	44	10	25	44	10	25	43	5	20	33	10	25	50	10	25	49	2	3	3
P39969	BOI2	NP_011039.1;		1040	10	25	46	10	25	44	10	25	39	10	24	39	5	10	30	10	25	43	10	25	46	0	1	2
Q99394	TRS33	NP_014758.3;	O3251 YOR3251C	268	10	18	19	10	25	44	10	25	30	10	25	31	8	18	18	10	25	31	10	25	29	0	0	1
P47041	BIT61	NP_012477.1;	J1141	543	10	24	42	10	25	44	10	20	20	9	24	42	2	2	2	10	14	14	10	17	17	0	0	1
P05085	ARG81	NP_013610.1		880	10	25	50	10	25	44	10	11	11	9	9	9	6	12	23	10	14	14	10	20	25	3	4	7
Q03735	NAB6	NP_013589.1;	YM8339.02	1134	10	12	12	10	25	44	10	14	14	8	14	23	6	8	33	10	12	12	10	18	43	2	2	2
P06784	STE7	NP_010122.1;	D1525	515	9	24	26	10	25	44	9	23	42	2	16	39	1	11	15	10	25	37	10	24	31	1	2	3
P30902	ATP7	NP_012909.3		174	6	20	34	10	19	44	5	5	9	0	0	9	3	3	3	10	13	24	8	8	8	2	3	5
P38891	BAT1	NP_012078.3;		393	10	25	43	10	25	44	7	7	29	0	1	22	3	3	20	7	16	34	9	14	31	2	2	5
P25294	SIS1	NP_014391.1	N2879	352	10	21	35	6	19	44	7	7	17	0	4	28	2	2	13	5	5	5	4	4	17	2	4	9
P40487	DPH1	NP_012163.1		425	10	25	40	10	25	43	10	25	35	10	25	34	5	16	20	10	25	31	10	25	39	2	3	6
P53742	NOG2	NP_014451.1	N3484	486	10	25	46	10	25	43	10	20	21	10	25	27	4	11	11	10	23	23	10	16	16	3	5	9
Q06706	IKI3	NP_013488.3	L3502.7	1349	10	19	37	10	25	43	10	21	25	10	10	11	4	4	14	10	20	36	10	25	41	2	3	5
P53874	UBP10	NP_014213.2;	N1619	792	10	11	19	10	18	43	9	9	26	8	16	41	4	4	17	7	7	24	8	9	34	1	1	3
Q03818	ATG16	NP_013882.1	YM8520.08C	150	9	24	32	10	25	43	10	25	30	4	19	31	3	7	9	10	23	23	10	23	23	2	3	4
P11325	NAM2	NP_013486.3	L3502.6	894	10	21	41	10	24	43	10	20	25	2	2	7	4	11	18	10	17	17	10	17	28	0	3	8
P45818	ROK1	NP_011344.1	G1651	564	10	25	48	3	18	43	7	10	30	1	14	34	4	4	13	10	22	43	5	20	35	0	4	6
P53299	TIM13	NP_011697.3;	G7157	105	10	24	24	10	25	43	10	25	28	0	12	16	7	10	10	10	25	29	10	25	28	0	2	4
P40505	SDS3	NP_012182.1		327	10	25	36	10	25	43	10	10	10	0	0	0	4	4	4	10	19	19	10	16	16	2	5	7
P06182	CYC3	NP_009361.1;		269	8	15	23	3	18	43	9	17	42	0	12	37	4	17	42	10	12	23	10	25	50	1	2	2
P47171	HIR3	NP_012674.1;	J2161	1648	9	10	13	10	25	43	8	15	15	0	3	3	6	6	6	10	21	21	10	23	30	0	0	3
P52553	YKE2	NP_013301.1;	L8167.8	114	6	6	17	10	22	43	7	7	7	0	0	4	2	2	2	9	9	9	5	5	5	1	2	4
P40362	UTP18	NP_012466.1;	HRE594 J1098	594	10	16	16	10	20	42	10	16	19	10	25	41	4	8	8	10	25	50	10	18	40	0	1	2
P39517	DHH1	NP_010121.1;		506	10	20	45	10	25	42	10	18	33	10	24	40	8	17	32	10	23	31	10	21	26	0	1	4
P53204	NMA2	NP_011524.1;		395	10	24	25	10	25	42	10	25	32	10	25	34	5	20	29	10	25	37	10	25	41	2	2	3
P53066		NP_011272.1;	HRE181	181	8	8	21	10	24	42	10	10	10	10	11	18	5	5	5	10	10	10	10	15	19	0	0	3
Q01476	UBP2	NP_014767.3;	O3281 YOR3281C	1272	4	10	13	10	25	42	10	25	47	10	25	42	4	4	13	10	20	23	10	25	50	1	2	2
Q92331	VPS5	NP_014712.2;	YOR29-20	675	9	24	37	6	17	42	10	22	38	10	25	50	5	5	5	10	24	49	7	7	7	0	1	2
Q12464	RVB2	NP_015089.1;	P1060	471	10	12	20	10	25	42	10	13	28	8	9	26	6	7	19	10	23	39	10	19	35	0	1	1
P05743	RPL26A	NP_013448.1	L8300.4	127	10	25	48	10	25	42	10	14	14	7	9	9	5	5	5	10	18	18	10	16	16	1	3	5
P53221	RPL26B	NP_011548.2		127	10	25	49	10	25	42	10	11	11	7	8	8	5	5	5	10	18	18	10	17	17	1	3	5
Q03337	TRS31	NP_010760.3;		283	10	18	30	10	25	42	10	23	24	6	11	12	3	18	18	10	22	22	10	21	21	0	1	2
Q07930	PML1	NP_013116.1	L1591	204	10	20	20	10	24	42	10	16	16	4	6	8	3	10	21	10	13	13	10	19	19	1	4	6
P26754	RFA2	NP_014087.1;	N0368	273	10	25	39	10	25	42	10	24	37	2	17	34	3	18	27	10	25	38	10	25	40	0	0	2
Q02206	RSC4	NP_012933.4	YK107	625	10	25	35	10	25	42	10	25	39	2	15	27	2	15	34	10	25	35	10	25	44	3	5	8
P36122	BCH2	NP_012952.3		765	10	25	50	10	25	42	10	25	42	0	12	24	6	21	24	10	25	29	10	25	44	2	6	9
P53973	HDA1	NP_014377.1	N2819	706	10	25	50	10	25	42	10	25	36	0	11	21	2	2	2	10	25	39	10	24	40	2	5	8
P53951	COG5	NP_014347.1;	N2476 YNL2476W	403	7	7	23	10	25	42	7	7	7	0	0	2	4	4	8	10	14	14	9	9	9	0	1	4
Q03557	HER2	NP_014021.1		464	7	15	30	10	25	42	7	7	7	0	0	1	4	5	18	10	14	14	5	5	15	2	3	6
P40079	LCP5	NP_011053.1;	SYGP-ORF43	357	2	9	16	10	25	42	6	6	8	0	0	4	4	4	4	10	22	22	5	6	24	1	1	1
P32910	RPC34	NP_014400.1;	N2031	317	5	5	5	10	25	42	8	8	8	0	0	0	4	4	4	9	9	9	10	15	18	0	2	3
P89105	CTR9	NP_014496.2;		1077	10	19	28	9	20	42	9	9	17	0	0	12	3	9	19	8	8	8	10	17	25	1	2	3
P38757	NEM1	NP_011867.1		446	7	22	36	5	17	42	6	6	23	0	0	9	3	3	12	8	22	47	5	5	18	1	6	8
P08067	RIP1	NP_010890.3		215	10	23	46	10	25	42	7	7	7	0	0	5	5	5	16	6	6	6	5	5	10	1	3	6
P53114	NUT1	NP_011364.1;	G1876	1132	5	9	9	7	17	42	4	4	14	0	0	5	2	2	2	5	5	16	5	5	9	1	2	4
P36094	SPC42	NP_012882.3;	YKL255	363	10	22	37	10	25	41	10	14	20	10	13	31	6	12	28	10	18	18	10	24	42	1	2	3
Q07914	PAM18	NP_013108.1;		168	10	19	25	10	25	41	10	25	27	10	25	31	9	24	46	10	25	32	10	25	41	0	0	1
P11746	MCM1	NP_013757.1	YM9532.08	286	10	24	44	10	25	41	10	25	25	10	24	27	7	10	10	10	20	20	10	18	18	0	3	8
P25694	CDC48	NP_010157.1;		835	10	23	48	10	25	41	10	23	24	9	20	20	4	9	9	10	25	30	10	21	21	1	2	5
Q01852	TIM44	NP_012242.1;		431	10	19	32	10	25	41	9	9	19	9	10	21	5	5	16	10	17	17	10	13	25	0	0	0
Q12098	SLX4	NP_013236.1;	L3140	748	5	16	16	8	16	41	8	11	28	9	24	49	1	1	6	9	9	9	7	8	33	1	1	1
P53330	RTT102	NP_011791.4	G9378	157	9	24	32	6	16	41	7	7	21	6	9	28	4	14	14	9	9	9	2	7	24	1	3	4
P12689	REV1	NP_014991.1;	O6339	985	10	13	25	7	16	41	9	11	19	1	11	26	4	10	19	10	18	30	8	8	8	0	1	2
P40151	MGS1	NP_014181.1;	N1302	587	9	18	36	8	16	41	6	6	17	1	1	17	4	4	19	10	10	33	9	9	25	1	2	5
P0C074	YSF3	NP_878153.1		85	9	24	35	10	25	41	8	8	11	1	1	10	0	0	0	7	7	7	4	8	9	2	5	5
P33750	SOF1	NP_013090.1	L1339	489	10	25	35	10	25	41	10	24	34	0	12	21	2	4	8	10	19	19	10	21	29	3	4	6
P41695	BUB1	NP_011704.3;	G7542	1021	9	24	34	10	25	41	10	25	37	0	10	16	5	20	20	10	25	39	10	25	40	0	2	4
P36162	DAD2	NP_013009.1	YKR403	133	3	15	18	10	25	41	6	6	6	0	0	11	3	3	3	10	13	13	5	5	13	1	3	5
P46948	SKI6	NP_011711.3;	G7587	246	10	19	35	10	20	41	7	7	19	0	0	14	3	3	14	9	9	9	5	5	5	0	0	1
Q12028	APL4	NP_015354.1;		832	5	20	44	10	23	41	8	8	11	0	0	1	4	4	4	8	8	8	7	7	15	1	2	6
Q04437	YKU80	NP_013824.1;	YM9718.05C	629	9	21	28	10	25	41	7	7	7	0	0	0	5	6	6	7	7	7	7	17	17	0	2	6
P38175	MRP21	NP_009463.1;	YBL0702	177	9	24	42	10	16	41	5	5	12	0	0	10	3	3	12	7	7	20	1	1	12	1	1	3
P52919	NBP1	NP_013562.3	L9122.6	319	9	24	49	4	16	41	4	4	21	0	3	28	2	2	2	7	16	41	5	5	18	2	3	6
P38351	PAF1	NP_009838.1	YBR2016	445	7	20	20	10	25	41	7	7	11	0	2	9	3	13	25	6	6	9	6	12	21	2	4	5
P33891	TIP20	NP_116577.1;		701	10	10	10	10	25	41	7	7	7	0	0	3	5	5	5	6	6	6	5	5	5	0	1	3
P53145	LSG1	NP_011416.3		640	10	25	46	10	25	40	10	25	33	10	25	40	3	16	16	10	25	26	10	25	25	4	9	11
P32607	RTG1	NP_014574.1		177	10	24	33	10	25	40	10	22	22	10	25	31	8	17	25	10	25	50	10	25	34	0	3	4
Q08561	IES4	NP_014832.1;		116	7	17	35	10	25	40	10	25	37	10	25	41	4	12	26	10	25	50	10	25	50	0	1	5
P39073	SSN3	NP_015283.1;		555	10	17	27	10	25	40	10	25	35	7	21	33	5	5	8	10	12	12	10	18	41	1	1	4
P38313	AME1	NP_009770.3;	YBR1458	324	8	23	42	10	25	40	8	8	17	7	17	38	3	4	11	10	19	19	5	18	32	1	1	2
P12611	WHI2	NP_014686.1;		486	9	17	17	10	25	40	10	25	36	6	21	30	6	6	10	10	25	39	10	25	39	0	0	0
P16649	TUP1	NP_010007.1;	YCR84C	713	7	7	11	10	15	40	8	8	8	6	7	17	7	7	7	10	10	10	10	10	10	1	1	3
P32855	SEC8	NP_015380.1;	YP9499.11	1065	10	18	18	10	25	40	10	22	26	4	13	20	4	4	4	10	25	30	10	24	34	2	2	2
P14126	RPL3	NP_014706.1;	YOR29-14	387	10	21	41	10	25	40	10	18	20	4	4	6	2	2	2	10	11	11	10	15	21	1	2	6
P54790	ORC3	NP_013097.1;	L1365	616	8	11	27	10	25	40	10	14	19	3	4	9	4	4	15	10	25	29	10	25	39	2	2	6
P23179	SPO11	NP_011841.1		398	10	22	35	10	25	40	9	18	28	2	10	20	1	1	17	9	9	21	10	15	33	3	5	6
Q00916	SNP1	NP_012203.1		300	10	25	42	10	25	40	9	20	35	1	6	17	6	21	33	9	13	13	10	23	37	1	3	4
P40963	SAS2	NP_013846.1	YM9553.03C	338	10	25	36	10	25	40	10	25	34	0	11	17	5	15	20	10	25	34	10	25	35	0	6	11
Q04439	MYO5	NP_013827.1	YM9718.08	1219	10	25	45	10	25	40	10	25	26	0	9	9	1	1	1	10	25	39	10	18	18	3	6	10
P19262	KGD2	NP_010432.3	YD8358.05C	463	10	21	35	10	25	40	7	7	7	0	0	0	3	3	3	10	11	11	5	5	5	0	3	6
P40856	SAP185	NP_012437.1;	J0840	1058	9	16	38	7	15	40	6	6	20	0	0	14	4	7	24	10	25	50	10	18	42	1	2	5
Q12343	MED4	NP_014817.3;	O3630	284	8	19	33	10	25	40	8	8	8	0	1	1	3	3	3	6	6	6	6	16	25	1	1	3
P05626	ATP4	NP_015247.1;	LPF7C	244	7	14	25	10	25	40	6	6	15	0	0	7	4	4	11	6	6	14	9	11	27	0	1	4
Q03782	SNU56	NP_010526.1;		492	10	25	48	10	25	39	10	25	38	10	25	34	2	14	23	10	25	41	10	25	40	0	2	4
P52870	SBH1	NP_011011.3	YER087BC	82	10	25	41	10	25	39	10	25	32	10	25	30	8	12	21	10	25	41	10	25	49	0	3	6
P36047	SDS22	NP_012728.1		338	10	25	37	10	25	39	10	24	28	10	18	18	7	7	7	10	25	29	10	20	21	2	4	4
P40484	MOB1	NP_012160.2;		314	9	17	38	5	14	39	8	11	33	9	24	49	4	4	27	5	5	5	10	25	50	0	1	2
P32328	DBF20	NP_015436.1;		564	7	14	35	10	14	39	9	11	36	7	8	29	5	12	32	10	25	50	10	25	50	0	0	2
P38283	SLI15	NP_009714.3	YBR1206	698	7	22	38	10	24	39	10	21	21	6	21	40	1	1	1	10	18	18	3	11	11	3	4	4
Q03435	NHP10	NP_010282.3	YD8119.05C	203	10	25	39	10	25	39	8	8	8	5	5	5	1	1	1	10	12	12	10	11	11	2	3	5
P32839	BCS1	NP_010663.1;	D9481.17	456	9	24	32	10	25	39	10	25	36	1	10	24	4	14	26	10	25	32	7	13	18	1	2	4
P40063	RTT105	NP_011030.3;		208	10	12	37	7	14	39	6	6	27	1	2	27	7	9	9	10	25	50	10	12	37	0	1	1
P52893	ALT1	NP_013190.1;	L9449.15	592	10	19	40	8	14	39	5	5	6	0	0	8	3	3	10	8	8	8	10	10	15	1	2	4
P40335	PEP8	NP_012482.1;	J1152	379	9	20	42	4	14	39	4	4	4	0	1	10	5	5	5	6	6	6	4	11	36	1	2	4
P06100	CDC36	NP_010116.1		191	8	20	20	7	18	39	4	4	4	0	0	0	1	1	1	4	4	4	4	4	23	2	4	4
Q12499	NOP58	NP_014955.1	O6108	511	4	13	22	5	14	39	4	4	4	0	0	0	3	3	3	3	3	3	3	3	3	0	4	8
P17076	RPL8A	NP_011830.1		256	10	25	50	10	25	38	10	25	39	10	25	40	3	18	30	10	25	41	10	25	35	2	5	8
P29453	RPL8B	NP_013055.1		256	10	25	50	10	25	38	10	25	39	10	25	39	3	18	30	10	25	39	10	25	39	2	6	9
P50109	PSP2	NP_013695.2;	YM9571.01	593	10	19	24	10	25	38	10	17	18	10	25	39	10	13	13	10	17	17	10	25	50	0	2	2
P38912	TIF11	NP_013987.1	YM8156.02C	153	10	25	28	10	25	38	10	25	31	10	25	31	5	18	18	10	25	27	10	25	26	5	7	9
Q12692	HTZ1	NP_014631.1	O2345	134	10	25	45	10	25	38	10	25	31	10	22	23	6	18	18	10	25	31	10	25	33	3	4	6
Q03281	HEH2	NP_010746.1;	D8035.2	663	10	20	36	10	13	38	9	9	9	10	17	33	6	6	6	10	18	43	9	9	19	1	2	5
Q3E792	RPS25A	NP_011541.1		108	8	20	45	10	25	38	10	25	32	6	13	19	3	3	3	10	25	26	5	6	6	2	8	12
P0C0T4	RPS25B	NP_013437.1	L8300.10	108	8	20	45	10	25	38	10	25	32	5	10	16	3	3	3	10	25	26	5	5	5	2	8	12
Q04272	VPS20	NP_013794.1	YM9582.02C	221	10	25	50	10	25	38	10	10	10	5	5	6	3	3	3	9	9	9	10	11	11	2	5	9
P25586	KRR1	NP_009872.1	YCL59C	316	10	17	31	10	25	38	10	15	22	4	4	4	6	9	9	10	20	30	10	16	28	1	4	5
P53129	MON1	NP_011391.2	G2889	644	9	22	33	7	21	38	8	8	8	4	17	32	4	11	11	8	8	8	10	25	33	0	3	5
Q04305	UTP15	NP_013811.1;	YM9582.18	513	10	23	23	10	25	38	10	23	28	3	8	12	5	5	11	10	10	10	10	14	14	0	1	2
P36224	JNM1	NP_014022.1;		373	10	18	35	5	13	38	6	8	33	3	10	35	5	5	5	10	19	44	7	8	26	0	0	2
P53946	ARP5	NP_014339.1;	N2430 YNL2430C	755	10	21	29	10	25	38	10	25	39	3	14	24	7	15	32	9	12	20	10	25	36	0	1	2
Q12363	WTM1	NP_014873.3	YOR50-20	437	10	25	41	10	25	38	8	8	8	1	1	1	5	5	5	10	19	19	10	10	10	3	4	7
P26786	RPS7A	NP_014739.1;	YOR3177W	190	10	14	27	10	25	38	8	8	8	1	1	1	4	4	4	10	12	12	6	6	6	1	1	3
P39929	SNF7	NP_013125.1		240	9	19	36	7	19	38	8	10	12	0	5	13	6	11	11	10	18	18	10	20	20	0	3	5
P09368	PUT1	NP_013243.1	L3170 L9606.2	476	10	23	26	10	13	38	5	5	6	0	0	0	3	3	5	8	8	8	10	15	27	1	3	4
P40054	SER3	NP_011004.3;		469	5	5	5	10	25	38	9	11	17	0	3	6	5	14	21	7	7	7	2	6	6	0	0	2
P38210	LDB7	NP_009547.2;	YBL0322	180	6	6	22	6	13	38	5	5	19	0	0	14	7	7	15	7	7	23	9	9	28	0	1	2
P19658	EXO70	NP_012450.1;	J0932	623	10	20	32	6	15	38	5	5	5	0	0	0	3	3	3	5	5	5	4	4	8	0	2	5
P25443	RPS2	NP_011392.1;	G2893	254	10	25	46	10	25	37	10	25	34	10	25	35	2	17	24	10	25	35	10	25	36	1	1	5
P49960	PRP24	NP_013995.1;	YM8156.10C	444	10	25	49	10	25	37	10	25	33	10	24	29	4	17	17	10	25	35	10	25	29	0	1	5
P39939	RPS26B	NP_011057.1		119	10	25	40	10	25	37	10	24	24	10	24	24	4	12	12	10	17	17	10	20	20	2	5	9
P39938	RPS26A	NP_011326.1	G1355	119	10	25	40	10	25	37	10	24	24	10	24	24	4	12	12	10	17	17	10	20	20	2	5	9
P32657	CHD1	NP_011091.1;	SYGP-ORF4	1468	10	16	36	6	12	37	9	12	36	10	25	50	3	3	14	10	25	50	10	25	50	1	1	3
P41912	SHR5	NP_014531.1;	HRC237	237	10	16	16	10	20	37	10	11	18	9	12	21	4	4	12	10	17	25	10	25	50	1	1	3
P23248	RPS1B	NP_013648.1		255	10	25	49	10	25	37	10	12	12	9	13	15	4	4	4	10	18	18	10	17	17	2	7	11
P40477	NUP159	NP_012151.1		1460	10	19	19	10	25	37	10	10	10	4	4	4	6	6	6	10	14	14	10	15	15	1	3	5
Q03973	HMO1	NP_010459.1	YD9395.07	246	10	15	22	10	25	37	8	8	8	4	4	4	5	5	5	10	12	12	5	5	5	2	4	5
P30624	FAA1	NP_014962.3;	O6136	700	10	25	38	10	25	37	9	14	16	2	16	21	4	4	11	10	25	27	10	24	24	1	1	3
P34160	STO1	NP_013844.2;	YM8564.07 YM9553.01	861	10	25	34	10	25	37	9	20	24	2	13	13	3	10	10	10	20	20	10	25	29	1	2	4
P11433	CDC24	NP_009359.1;		854	9	24	32	10	25	37	10	18	20	0	10	17	4	18	18	10	25	29	10	25	41	0	2	3
P48164	RPS7B	NP_014303.3;	N2212	190	8	13	36	10	25	37	8	8	8	0	0	0	5	5	5	10	14	14	10	12	17	1	2	4
Q06156	YCS4	NP_013374.1;	L8479.14	1176	6	20	24	8	22	37	8	15	15	0	2	2	4	6	6	10	25	25	4	8	8	0	1	1
P24583	PKC1	NP_009445.2	YBL0807	1151	4	14	24	10	22	37	6	6	6	0	0	0	3	3	3	10	10	10	9	9	9	1	3	7
Q06102	YTH1	NP_015432.1;		208	10	18	35	6	12	37	5	5	5	0	0	0	4	4	26	8	8	8	9	9	26	1	2	3
P54784	ORC1	NP_013646.1;		914	10	25	50	5	12	37	6	7	17	0	1	7	4	4	9	7	7	7	6	6	8	2	2	6
P38801	LRP1	NP_011949.1		184	10	20	28	10	25	37	7	7	7	0	0	0	2	2	2	6	6	6	5	5	5	2	4	7
P15624	FRS1	NP_013161.1;	L2165	595	8	13	20	6	12	37	5	5	18	0	0	11	4	4	4	6	6	6	6	6	14	1	2	3
P32523	PRP19	NP_013064.1		503	10	22	33	7	19	37	8	8	13	0	0	3	4	8	17	5	5	5	0	0	7	1	3	4
P05745	RPL36A	NP_013920.1	YM9646.06	100	8	23	41	10	25	37	7	7	7	0	7	12	5	10	10	4	4	4	4	4	4	1	5	8
P25659	FUB1	NP_010001.1;	YCR76C	250	4	15	40	5	12	37	4	4	4	0	1	7	1	1	9	4	4	9	0	0	7	1	2	5
P40366	DLS1	NP_012470.1	HRD167 J1115	167	10	22	24	10	25	36	10	20	23	10	18	28	7	12	14	10	16	16	10	20	20	1	3	4
P38165	RTG3	NP_009447.1;	YBL0810	486	8	8	8	10	23	36	10	19	37	10	23	48	4	4	21	10	14	14	10	25	50	0	1	2
P42841	PFS2	NP_014082.1;	N0348	465	7	20	39	10	25	36	10	25	30	10	25	28	4	4	4	10	25	26	10	25	40	0	2	2
P40208	GID8	NP_013854.1	YM9375.04C	455	10	25	33	10	25	36	10	11	11	6	15	15	7	22	26	10	25	28	10	25	32	0	3	8
Q3E757	RPL11B	NP_011599.1		174	10	22	40	10	13	36	9	9	9	6	6	7	4	4	4	8	8	8	10	10	10	1	3	5
Q00955	ACC1	NP_014413.1;	N3175	2233	10	13	15	10	25	36	10	18	18	5	8	9	5	5	5	10	13	13	10	12	12	0	1	3
P0C0W9	RPL11A	NP_015427.1	P8283.14	174	10	22	39	10	13	36	8	8	8	5	5	6	3	3	3	8	8	8	10	10	10	1	3	5
P23644	TOM40	NP_013930.1;	YM8325.04	387	9	17	17	10	25	36	9	9	9	4	5	5	4	4	15	10	25	35	10	13	22	0	1	3
P26321	RPL5	NP_015194.1;	LPI14W	297	10	25	50	10	25	36	10	22	30	0	1	2	4	4	4	10	25	30	10	25	34	2	2	7
P29468	PAP1	NP_012927.3;		568	10	22	29	7	14	36	8	8	8	0	0	2	5	5	5	10	25	44	10	15	16	1	2	4
P07143	CYT1	NP_014708.1;	YOR29-16	309	9	23	31	10	25	36	7	7	7	0	0	0	3	3	3	10	25	33	7	7	7	1	2	5
P38796	PPE1	NP_011942.1;		400	4	13	25	8	11	36	7	7	27	0	1	20	3	3	22	10	25	50	6	6	29	1	2	2
Q12345	IES3	NP_013153.1	L2131	250	5	12	21	5	11	36	6	6	30	0	5	30	4	4	24	10	25	50	7	16	41	2	3	7
P35729	NUP120	NP_012866.1;	YKL313 YKL314	1037	4	13	25	3	11	36	4	5	25	0	3	18	4	9	34	10	24	46	0	5	27	0	1	3
P49704	PRP31	NP_011605.1;		494	9	17	39	10	25	36	10	19	19	0	0	2	4	4	4	8	8	8	6	6	6	0	1	4
P46961	GPI2	NP_015249.1;	LPF9W	280	6	15	26	5	14	36	5	5	11	0	0	1	3	6	6	8	9	31	5	5	20	1	2	5
O14455	RPL36B	NP_015074.1	YPL249BC	100	8	23	41	10	25	36	7	7	8	0	8	14	4	4	4	4	4	4	6	6	6	1	5	8
Q06640		NP_010592.1		478	10	25	46	10	25	35	10	13	16	10	24	40	3	7	10	10	25	37	10	25	35	4	5	7
Q12398	HMS1	NP_014675.1;	OR26.22	434	10	16	27	10	23	35	10	16	20	10	18	40	6	15	15	10	19	19	10	24	40	1	2	3
Q12206	WTM2	NP_014872.1	YOR50-19	467	10	22	35	10	25	35	10	20	20	10	24	26	4	10	10	10	25	31	10	25	37	2	3	5
Q06488	RSC2	NP_013461.1;	L9638.1	889	10	15	33	10	25	35	10	15	15	10	16	16	9	12	20	10	20	20	10	21	22	0	2	5
P22138	RPA135	NP_015335.1;	YP9531.03C	1203	10	25	34	10	25	35	10	25	38	9	22	27	4	4	13	10	25	25	10	11	18	2	2	4
P46971	PMT4	NP_012677.1	J2176	762	10	24	28	10	25	35	10	25	27	6	10	10	5	19	19	10	24	24	10	25	33	3	5	7
Q06287	EMG1	NP_013287.1;	L9470.5	252	9	24	36	10	25	35	10	16	16	6	13	14	3	5	5	10	20	20	10	25	28	0	2	5
P28007	GAR1	NP_011957.1;		205	10	25	29	10	25	35	10	25	34	3	13	19	7	22	34	10	25	34	10	25	36	0	0	0
P53844	PDR17	NP_014135.1	N0815	350	10	23	30	10	19	35	10	11	16	2	2	6	3	3	16	10	17	17	10	17	35	1	4	6
Q08004	BUD20	NP_013175.1		166	10	25	36	10	20	35	9	9	10	2	2	10	2	2	10	9	9	9	3	3	8	2	3	6
P35207	SKI2	NP_013502.3;	L8084.17	1287	7	10	25	10	20	35	7	7	7	1	1	5	6	6	6	10	12	12	9	9	20	0	1	3
P50085	PHB2	NP_011747.2	G8561	310	7	10	17	10	25	35	10	22	29	0	3	6	4	5	22	10	17	25	6	8	15	0	3	3
P52891	NUP84	NP_010167.1		726	10	16	26	10	25	35	9	10	12	0	0	0	4	4	4	10	10	10	6	6	13	0	3	3
P36527	MRPL28	NP_010750.1;	D8035.6	147	10	25	45	6	10	35	7	7	9	0	0	4	2	2	2	10	11	16	8	8	8	2	2	5
Q03954	SPC19	NP_010487.3;		165	6	9	29	10	22	35	7	7	7	0	2	9	3	3	3	10	10	10	4	4	4	0	1	3
P36531	MRPL36	NP_009680.2;	YBR0918	177	5	20	41	10	25	35	6	11	17	0	9	16	1	13	13	10	21	21	0	6	6	2	2	6
Q12277	RRP42	NP_010172.1;		265	4	16	24	9	22	35	5	6	8	0	0	0	3	13	28	10	24	24	7	14	19	1	1	1
Q03195	RLI1	NP_010376.3		608	10	25	48	10	25	35	8	8	8	0	0	0	4	4	4	7	7	7	7	7	7	1	6	9
P53552	THO2	NP_014260.3;	N1209 N1835	1597	3	18	30	10	25	35	7	7	7	0	0	2	2	2	2	7	7	7	10	24	24	1	2	3
P46988	PFD1	NP_012356.2;	J0488	109	3	8	17	10	21	35	8	8	8	0	0	0	2	2	2	6	6	6	2	2	4	0	0	4
P13365	CLN3	NP_009360.1;	FUN10	580	2	2	5	2	10	35	4	4	4	0	0	0	2	2	2	6	14	39	0	0	0	1	1	2
P21576	VPS1	NP_012926.1;		704	2	2	15	6	15	35	7	7	7	0	8	20	5	15	19	5	6	6	3	12	32	1	1	2
P34252	SLD2	NP_012814.1	YKL463	453	6	21	36	5	10	35	3	3	8	0	1	12	2	2	2	4	5	8	3	4	7	2	5	9
P27466	CMK1	NP_116669.1		446	10	25	36	10	25	34	10	25	27	10	25	25	5	8	8	10	25	29	10	25	37	2	4	8
Q08273	HRT1	NP_014508.1;		121	10	25	40	10	25	34	10	25	26	10	25	25	4	4	4	10	25	31	10	25	32	0	0	5
P46683	YAR1	NP_015085.1;		200	10	12	20	10	20	34	10	11	11	6	6	6	4	4	4	10	14	14	10	13	13	0	0	2
P17649	UGA1	NP_011533.3;		471	9	24	25	10	25	34	10	25	35	3	17	24	2	14	14	10	24	24	5	20	21	0	2	5
P32897	TIM23	NP_014414.3;	N3180	222	10	25	26	10	25	34	10	25	34	0	15	23	6	20	32	10	25	33	10	25	30	1	2	4
Q08204	SMC5	NP_014608.1;		1093	10	25	43	10	25	34	10	24	29	0	13	18	4	4	4	10	25	26	4	12	14	0	1	4
P23503	NAR1	NP_014159.1;	N1114	491	8	22	39	8	9	34	7	7	14	0	0	9	4	6	19	10	17	24	10	13	13	0	1	4
P36103		NP_012902.4;		277	5	14	32	6	10	34	6	6	24	0	0	25	2	2	2	10	25	50	5	5	11	1	2	3
P13574	STE12	NP_011952.1;		688	10	24	31	10	25	34	9	19	23	0	1	3	5	5	5	8	12	12	0	7	12	1	2	4
P32387	MRP20	NP_010693.3	D9509.23	263	9	21	39	6	9	34	8	8	8	0	0	0	6	6	6	6	6	7	4	4	9	1	3	5
P39726	GCV3	NP_009355.3;	FUN40	170	10	23	27	10	25	34	8	8	8	0	0	0	5	6	15	5	5	5	6	6	6	0	1	3
Q03124	RSC9	NP_013579.1;	YM4987.08	581	10	23	23	10	25	33	10	23	25	10	25	25	6	17	21	10	25	27	10	25	31	0	0	1
Q00416	SEN1	NP_013534.3;	L9576.1	2231	10	25	25	10	25	33	10	25	27	10	23	23	10	24	24	10	25	29	10	25	27	0	2	4
P38930	CKB2	NP_014682.1;	OR26.32	258	10	25	33	10	25	33	10	25	28	10	21	21	7	7	11	10	25	30	10	25	31	0	0	1
Q03214	ECM5	NP_013901.1;	YM8010.06	1411	8	16	24	9	11	33	10	11	11	4	5	5	5	5	5	10	11	11	10	16	22	1	2	4
P41697	BUD6	NP_013423.1	L8543.5	788	10	25	30	10	25	33	10	16	16	3	12	12	4	11	11	10	22	22	10	19	19	1	3	6
P10507	MAS1	NP_013264.1;	L9632.10	462	9	24	41	10	25	33	9	12	13	1	8	10	3	6	13	10	13	13	7	7	7	1	1	2
Q05949	BUR2	NP_013327.1		395	10	25	31	10	25	33	10	25	34	0	3	3	7	21	30	10	25	33	10	25	45	1	3	3
Q12186	MSL5	NP_013217.1	L2949	476	10	25	45	10	25	33	9	17	17	0	13	17	3	3	3	10	23	23	10	25	26	0	4	5
Q04493	GIM5	NP_013616.1		163	10	13	13	10	25	33	9	9	9	0	0	0	4	4	4	10	10	10	10	11	11	2	3	5
P07260	CDC33	NP_014502.1		213	7	22	43	10	25	33	9	9	9	0	8	9	2	2	2	10	25	30	10	25	41	2	3	6
O74700	TIM9	NP_010894.1	YEL020BW	87	10	11	17	10	25	33	8	8	8	0	0	0	3	3	3	10	14	14	8	8	8	1	4	6
Q06142	KAP95	NP_013451.1;	L8300.15	861	2	12	12	10	25	33	6	6	6	0	0	0	2	2	2	10	25	46	0	0	0	0	0	2
Q12461	RRD2	NP_015173.1;		358	10	23	33	10	19	33	7	7	11	0	1	6	4	4	4	9	9	9	4	4	19	1	2	5
P12709	PGI1	NP_009755.1	YBR1406	554	9	16	28	8	10	33	7	7	7	0	0	0	6	6	6	7	7	7	6	6	6	1	3	9
P38427	TSL1	NP_013608.1;		1098	3	5	5	0	8	33	0	0	12	0	7	31	1	1	1	6	6	18	0	0	3	0	0	0
Q03071	ELC1	NP_015279.1;		99	7	22	27	10	24	33	8	8	8	0	0	0	5	5	5	5	5	5	3	3	5	1	2	5
P02309	HHF1; HHF2	NP_009563.1;NP_014368.1	YBR0122; N2752	103	10	25	50	10	25	32	10	25	27	10	17	17	7	13	13	10	20	20	10	20	20	2	5	7
P40060	IES5	NP_011017.3		125	10	24	35	10	25	32	10	14	14	10	12	12	5	5	5	10	10	10	8	8	8	1	4	6
Q12216	NFI1	NP_014799.1;		726	5	9	9	10	25	32	10	14	14	9	18	18	7	22	29	10	17	17	10	25	32	0	0	2
P00127	QCR6	NP_116691.3;		147	2	2	19	4	7	32	4	5	30	7	18	43	2	2	6	10	25	50	6	13	38	0	1	3
Q05027	TAF9	NP_013963.1;	YM9959.18	157	10	25	29	10	25	32	10	25	29	6	21	28	7	22	24	10	25	31	10	25	32	2	2	2
P51534	SHE4	NP_014678.1;	OR26.26	789	10	14	30	10	16	32	9	9	9	6	6	6	6	11	11	10	15	15	10	13	16	1	2	5
P26783	RPS5	NP_012657.1;	J2045	225	9	17	17	10	23	32	10	13	13	4	4	4	4	4	4	8	8	8	8	8	8	0	0	2
P38737	ECM29	NP_011833.1		1868	9	12	14	10	25	32	9	9	9	1	1	1	4	4	4	10	15	15	10	12	12	2	3	5
P0CX47	RPS11A	NP_009604.1;NP_010308.3	YD9813.03	156	10	25	50	10	25	32	10	22	27	1	11	12	4	4	4	6	6	6	10	22	22	0	3	8
P0CX48	RPS11B	NP_009604.1;NP_010308.3	YBR0501	156	10	25	50	10	25	32	10	22	27	1	11	12	4	4	4	6	6	6	10	22	22	0	3	8
P53253	NNF2	NP_011603.1		936	10	22	26	10	25	32	10	24	24	0	2	2	2	2	2	10	14	14	10	25	29	2	3	6
P38604	ERG7	NP_011939.2;		731	10	20	27	6	7	32	8	8	27	0	0	9	6	10	24	10	11	11	4	5	15	0	1	1
Q04693	RSE1	NP_013663.1	YM9827.03C	1361	5	9	30	6	17	32	7	7	16	0	0	11	3	3	3	10	25	42	10	15	15	1	3	4
Q12188	REC8	NP_015332.1	LPZ7C	680	10	15	29	10	11	32	5	5	5	0	0	0	5	5	21	10	11	31	6	6	21	1	4	6
P53235		NP_011568.3;		642	9	16	24	10	25	32	6	6	6	0	0	0	5	8	18	9	12	15	5	6	10	1	1	3
Q01939	RPT6	NP_011467.1;		405	10	25	47	6	9	32	8	8	8	0	0	2	5	5	5	8	8	8	8	8	8	0	2	4
P43593	UBP6	NP_116665.1;		499	8	19	31	6	7	32	7	7	7	0	0	7	4	4	4	8	8	8	6	6	6	0	1	5
P53538	SSU72	NP_014177.1;	N1279	206	10	11	11	10	25	32	6	6	6	0	0	1	5	5	18	8	8	8	9	9	12	1	1	2
P20053	PRP4	NP_015504.1;	P9705.6	465	6	14	22	4	12	32	6	8	10	0	11	14	2	2	2	8	8	8	0	0	0	1	2	4
Q02983	RRN5	NP_013242.1;	L3165 L9606.3	363	5	5	21	6	7	32	7	7	10	0	0	1	0	0	6	6	8	13	4	4	12	1	2	5
P53150	LIF1	NP_011425.1;		421	9	21	26	5	16	32	5	6	6	0	1	1	3	3	3	6	6	6	3	3	3	0	0	1
P37298	SDH4	NP_010463.1;	YD9395.11	181	9	14	36	10	18	32	6	6	8	0	0	3	2	2	16	5	5	5	10	12	24	1	1	4
Q08144	TLG2	NP_014624.1;		397	6	21	27	5	7	32	6	6	22	0	1	4	3	10	24	5	5	5	5	5	13	0	1	1
P38251	RFC5	NP_009644.3;	YBR0810	354	10	17	31	5	19	32	5	5	5	0	0	3	4	4	19	5	5	5	5	5	21	2	2	5
P32504	CBF2	NP_011656.3;		956	2	2	8	10	25	32	3	3	3	0	1	4	2	2	2	5	5	5	3	8	11	1	2	5
P05759	RPS31	NP_013268.1;	L9470.14	152	10	25	41	3	15	32	5	5	24	0	0	6	4	4	6	0	0	0	0	0	0	2	2	6
P25573	MGR1	NP_009886.1;	YCL314 YCL44C	417	10	25	36	10	25	31	10	25	27	10	25	27	7	22	33	10	25	32	10	25	32	0	1	4
P34241	URB1	NP_012911.3;		1764	10	25	31	10	25	31	10	25	25	10	22	22	6	6	6	10	25	30	10	25	37	0	2	3
P38291	POP7	NP_009726.3	YBR1219	140	10	25	40	10	25	31	10	23	23	10	21	21	3	3	3	10	25	31	10	21	21	3	6	10
P53905	LSM7	NP_014252.2	N1202 N1780	115	10	25	39	10	25	31	10	23	23	10	21	21	4	4	4	10	24	24	10	25	25	2	5	10
P40525	RPL34B	NP_012212.1		121	10	25	40	10	23	31	10	24	25	10	25	30	1	1	10	9	9	9	10	12	12	0	3	6
P87262	RPL34A	NP_010977.2	YER056BC	121	10	25	40	10	23	31	10	24	25	9	24	29	1	1	10	10	10	10	10	12	12	0	3	6
P10080	SBP1	NP_011829.1;		294	3	18	28	10	25	31	10	25	34	9	24	36	4	10	13	10	25	30	10	25	32	0	0	1
P46669	RPA43	NP_014985.1	O6271	326	10	25	39	10	25	31	10	24	27	8	23	25	4	4	13	10	14	14	10	13	22	1	5	6
P51862	ROM2	NP_013475.1;	L8039.3	1356	10	17	26	10	13	31	9	9	12	7	8	25	7	7	22	10	14	30	10	12	20	0	0	0
P32864	MRS6	NP_015015.1;		603	10	25	25	10	25	31	10	17	18	6	9	11	4	14	32	10	16	16	10	17	17	0	0	1
P24868	CLB1	NP_011622.1;	G5967	471	10	25	43	10	25	31	10	12	12	5	20	23	5	5	5	10	18	18	6	20	20	0	1	2
P32349	RPC82	NP_015516.1;	P9677.11	654	5	20	36	10	25	31	10	25	27	4	17	17	4	4	4	10	21	21	10	22	22	0	1	2
P09436	ILS1	NP_009477.1;	YBL0734	1072	10	14	22	10	22	31	8	8	8	2	2	2	4	4	18	10	12	20	10	14	22	0	2	4
Q06146		NP_013358.1;		321	10	23	37	6	8	31	8	8	26	1	8	30	5	20	21	10	25	50	8	8	14	0	0	0
P32602	SEC17	NP_009503.1	YBL0505 YBL0517	292	5	17	17	10	25	31	10	10	10	0	0	0	3	11	11	10	18	18	3	3	3	1	4	6
Q04007	SND1	NP_010472.3;		877	8	23	27	10	25	31	9	10	10	0	1	1	5	5	5	10	25	25	7	11	17	0	1	2
P28241	IDH2	NP_014779.1;	O3326 YOR3326W	369	10	25	35	10	15	31	8	9	16	0	1	5	5	9	33	10	25	34	0	0	11	0	1	3
P19882	HSP60	NP_013360.1;	L8479.10	572	10	25	31	10	25	31	7	7	7	0	0	0	3	3	3	10	19	19	5	5	5	0	1	3
P04051	RPO31	NP_014759.1	O3254 YOR3254C	1460	10	25	50	9	9	31	6	6	6	0	0	0	4	4	6	8	8	12	6	6	17	2	3	5
Q01722	GCR2	NP_014200.1;	N1374	534	6	6	25	5	6	31	4	4	21	0	1	26	2	2	21	7	8	33	6	10	35	1	1	1
P25368	RRP7	NP_009899.1	YCL184 YCL31C	297	8	8	16	6	9	31	5	5	5	0	0	0	3	3	3	6	6	9	10	10	21	1	3	5
P40033	RSM18	NP_010970.4		138	10	21	46	5	6	31	7	7	17	0	0	16	4	4	6	5	5	5	0	0	0	1	5	10
P00958	MES1	NP_011780.3		751	6	11	13	10	17	31	5	5	5	0	0	4	5	5	5	5	5	5	10	13	27	2	4	6
P00445	SOD1	NP_012638.1;	J1968	154	5	18	24	4	11	31	5	5	17	0	5	24	2	2	15	5	7	23	2	17	31	1	2	2
P38111	MEC1	NP_009694.3	YBR1012	2368	4	12	29	5	9	31	4	4	7	0	0	1	2	2	9	5	5	5	5	5	12	1	3	7
P11632	NHP6A	NP_015377.1	YP9499.09C	93	10	24	40	10	25	30	10	25	27	10	25	37	3	12	14	10	23	23	10	21	21	2	6	6
Q12122	LYS21	NP_010151.1;	D2195	440	10	25	25	10	25	30	10	25	27	10	25	27	4	17	23	10	25	31	10	25	27	0	0	1
Q02908	ELP3	NP_015239.1		557	10	19	38	10	21	30	10	16	16	10	14	14	5	7	7	10	19	19	10	18	18	2	6	6
P46677	TAF1	NP_011790.1;	G9374	1066	10	16	16	10	15	30	9	9	18	10	19	34	5	5	23	10	18	36	10	25	50	2	2	3
Q07508	LUC7	NP_010196.1;		261	10	10	22	10	18	30	10	14	14	7	8	8	5	5	5	10	12	12	10	25	40	0	1	4
P38615	RIM11	NP_013859.1;	YM9375.08	370	10	13	13	10	22	30	10	14	23	5	5	9	8	14	28	10	16	16	10	25	36	0	1	1
Q12365	BBP1	NP_015068.1;	P0745	385	10	13	38	7	7	30	8	8	25	4	4	26	8	12	14	10	25	50	10	18	43	0	2	4
P06102	NOT3	NP_012226.3		836	10	10	28	7	7	30	7	7	22	2	2	21	0	0	11	8	8	22	7	7	17	1	3	6
P36102	PAN3	NP_012900.1		679	10	16	30	5	5	30	7	7	17	1	1	19	4	4	28	9	9	9	9	9	14	2	4	6
Q03433	VPS71	NP_013671.1	YM8054.02C	280	4	19	44	5	5	30	7	7	11	1	2	16	1	1	1	7	7	13	9	9	15	3	3	7
P50108	MNN10	NP_010531.1;	YD8419.12	393	10	25	35	10	25	30	8	8	8	0	0	0	5	5	5	10	25	32	10	25	29	0	2	6
P42945	UTP10	NP_012426.1;	J0808	1769	6	18	33	10	25	30	8	8	8	0	0	0	4	4	4	10	25	29	6	13	13	0	1	3
P16387	PDA1	NP_011105.4;		420	10	25	50	10	12	30	7	7	27	0	0	16	3	3	4	10	11	11	10	12	24	1	1	4
P46673	NUP85	NP_012576.1;	J1624	744	10	12	35	9	15	30	7	9	25	0	2	11	5	9	10	10	15	15	5	5	5	0	0	2
Q01329	PTA1	NP_009356.1;	FUN39	785	3	6	6	10	25	30	10	14	14	0	0	0	2	2	2	9	9	9	7	15	15	0	1	5
P50094	IMD4	NP_013656.1	YM9958.06C	524	7	18	19	10	25	30	7	7	7	0	0	0	3	3	5	9	10	10	7	7	7	2	4	4
P01098	STF1	NP_010152.1;	YDL130BW	86	10	16	26	5	5	30	6	6	17	0	1	18	5	9	22	8	8	33	0	2	12	0	0	2
P40016	RPN3	NP_010938.1;		523	8	15	24	10	25	30	9	19	19	0	6	6	3	6	6	7	7	7	10	25	28	0	2	4
P47061	VPS53	NP_012505.1;	J1258	822	10	19	23	6	6	30	7	7	9	0	0	4	6	6	6	7	7	9	7	7	8	0	1	4
P43573	BUD27	NP_683715.1;		796	5	18	31	7	21	30	5	5	6	0	0	9	4	4	12	7	7	14	3	3	13	0	2	2
P38806	YNG2	NP_011958.1;		282	4	12	16	6	6	30	7	7	10	0	0	1	5	5	5	6	6	6	3	3	3	0	0	6
Q02948	VPS30	NP_015205.1;	LPH7	557	10	18	33	8	18	30	5	5	5	0	0	10	2	2	4	6	6	6	0	0	5	1	1	2
P53094	MDS3	NP_011318.2;	G1307	1487	10	22	35	10	25	30	4	4	4	0	0	0	4	19	20	6	6	6	6	11	11	0	1	2
P21771	MRPS28	NP_010624.3;	D9651.3	286	6	6	18	3	5	30	2	2	6	0	0	0	3	3	4	6	6	12	5	5	11	0	1	6
P53851	TEX1	NP_014146.1;	N0860	422	9	21	37	4	5	30	5	5	5	0	0	0	4	4	4	5	5	5	4	4	6	0	2	4
P0CH09	RPL40B	NP_012118.1;NP_013020.3;		128	10	25	41	3	15	30	5	5	23	0	0	7	4	4	6	0	0	0	0	0	0	2	2	6
P0CH08	RPL40A	NP_012118.1;NP_013020.3;		128	10	25	41	3	15	30	5	5	23	0	0	7	4	4	6	0	0	0	0	0	0	2	2	6
P47017	LSM1	NP_012411.1	J0714	172	10	24	32	10	25	29	10	25	25	10	22	22	5	5	5	10	25	34	10	25	31	1	4	4
Q12311	NTO1	NP_015356.1;		748	10	18	32	10	17	29	10	12	19	10	12	19	8	9	19	10	20	32	10	25	40	1	2	3
P53124	PCL10	NP_011381.1;	G2838	433	9	20	22	10	17	29	10	15	15	10	20	23	7	19	19	10	22	29	10	24	35	1	1	3
P25648	SRB8	NP_010004.1;	YCR81W/YCR80W	1427	10	17	17	10	25	29	10	25	33	7	21	28	5	20	25	10	24	26	10	18	18	0	1	2
P21951	POL2	NP_014137.1	N0825	2222	10	14	14	10	25	29	9	9	9	6	13	13	5	16	16	10	20	20	10	25	45	3	4	5
P80967	TOM5	NP_015459.1		50	10	13	17	10	25	29	10	21	24	2	12	12	4	4	4	10	22	27	10	19	22	0	3	6
P69852	HSK3	NP_690844.1;		69	7	7	7	10	25	29	10	10	10	2	2	2	4	4	4	10	10	10	8	8	8	1	1	4
P06104	RAD6	NP_011457.1;		172	8	22	27	10	25	29	10	25	25	1	11	11	3	11	23	10	24	24	4	12	16	0	2	2
P06778	RAD52	NP_013680.2 [P06778-1]		471	10	22	35	10	25	29	10	19	19	1	1	1	3	5	5	6	6	6	10	15	15	2	3	6
P40955	CHS6	NP_012436.1;	J0838	746	10	25	25	10	25	29	10	25	29	0	10	10	4	19	24	10	25	30	10	25	26	2	2	4
Q06551	ERF2	NP_013347.1;		359	10	25	35	10	25	29	10	21	21	0	6	6	3	3	12	10	25	27	10	25	31	0	1	3
P47029	ALY2	NP_012451.1;	J0934	1046	10	13	13	10	25	29	10	11	11	0	0	0	7	8	8	10	10	10	10	18	20	0	1	1
P38232	REG2	NP_009606.1;	YBR0504	338	9	21	29	10	25	29	10	25	28	0	2	5	7	13	24	10	23	23	10	21	32	0	1	1
P05739	RPL6B	NP_013553.1	L9324.4	176	10	25	40	10	25	29	10	23	23	0	8	11	2	2	2	10	22	22	9	10	10	1	4	6
P47108	URB2	NP_012575.3;	J1622	1174	9	16	32	10	25	29	10	11	11	0	0	0	4	4	4	10	25	28	6	6	6	0	1	6
P53152	MMS2	NP_011428.1		137	7	19	23	10	25	29	9	10	10	0	0	6	3	10	30	10	25	32	6	14	16	1	3	4
Q12368	SNU23	NP_010185.1;	D2378	194	10	25	37	10	25	29	8	8	8	0	0	0	6	6	6	10	25	25	10	10	10	0	0	4
P07256	COR1	NP_009508.1	YBL0403	457	9	24	33	10	20	29	8	8	8	0	0	2	4	4	4	10	25	33	10	14	26	1	3	3
Q06679	UTP4	NP_010611.3		776	7	22	34	10	25	29	8	12	12	0	2	2	4	4	4	10	13	13	10	11	11	1	5	5
Q02326	RPL6A	NP_013638.1		176	10	20	35	10	25	29	8	8	8	0	1	1	2	2	2	10	10	10	9	9	9	2	5	7
P07866	LTE1	NP_009378.1;		1435	10	15	15	10	25	29	8	8	8	0	0	0	2	11	13	10	10	10	8	8	15	1	1	2
P46962	CTK2	NP_012528.1;	J1390	323	10	20	27	10	25	29	7	7	7	0	0	0	4	4	4	10	10	10	4	4	4	0	2	5
Q03010	UME1	NP_015186.1	LPI7C	460	10	15	15	10	16	29	7	7	7	0	0	0	6	6	17	9	9	9	7	7	9	1	5	6
P09032	GCD1	NP_014903.1;		578	2	7	10	1	9	29	5	9	19	0	1	10	3	17	27	9	17	30	0	2	2	1	1	3
P28791	SEC20	NP_010786.3;	D9719.4	383	4	4	20	1	4	29	1	1	21	0	0	13	2	2	8	7	21	46	0	0	25	0	1	4
P35206	CSG2	NP_009592.1;	YBR0404	410	8	14	35	4	4	29	2	2	7	0	0	13	6	6	26	6	6	31	4	7	32	0	1	3
P32622	YEF1	NP_010873.1;	SYGP-ORF17	495	10	24	34	10	25	29	10	20	20	0	5	5	3	9	9	5	5	5	7	7	7	1	2	4
P28817	EHD3	NP_010321.1	YD9673.08C	500	10	22	39	10	23	29	7	7	7	0	0	1	2	2	2	5	5	5	2	5	5	1	3	3
P32342	SRP21	NP_012800.1;	YKL527	167	10	21	45	5	5	29	6	6	12	0	0	13	4	4	17	5	5	5	7	7	7	1	1	4
P38088	GRS1	NP_009679.2 [P38088-2];	YBR0917	690	10	25	40	9	24	29	4	4	4	0	0	0	3	3	3	4	4	4	2	2	2	2	2	2
P32611	RML2	NP_010864.3;	SYGP-ORF37	393	7	22	29	10	21	29	3	3	3	0	0	0	3	8	10	4	4	9	0	0	5	0	1	3
P38789	SSF1	NP_011933.1		453	10	25	25	10	25	28	10	25	26	10	24	27	2	2	2	10	24	24	10	22	22	3	4	5
P40164	PSY2	NP_014198.1;	N1366	858	10	25	43	10	25	28	10	25	25	10	23	23	9	15	23	10	25	25	10	25	27	0	0	3
P28004	PRP45	NP_009370.1;		379	10	25	43	10	25	28	10	20	20	10	22	22	5	11	11	10	25	25	10	25	26	1	1	4
Q12072	IOC2	NP_013196.1;		812	10	25	26	10	25	28	10	21	21	10	19	19	4	14	14	10	25	25	10	25	26	1	1	3
P18888	SNF6	NP_011838.1 [P18888-1]		332	10	19	19	10	21	28	10	18	18	10	19	19	2	2	15	10	22	22	10	17	29	3	4	4
Q9URQ5	HTL1	NP_009949.1;		78	10	14	22	10	18	28	10	10	10	10	15	19	6	6	6	10	12	12	10	19	26	0	1	1
P25389	KCC4	NP_009907.2;	YCL24W	1037	10	21	29	10	20	28	10	18	28	10	13	17	6	21	24	10	25	46	10	22	32	0	2	4
P35179	SSS1	NP_010371.1	D4475	80	10	21	32	10	25	28	10	18	18	10	11	11	2	2	2	10	19	19	10	21	21	2	4	9
P38302	NTC20	NP_009747.3;	YBR1316	140	8	9	20	10	21	28	10	10	12	10	20	32	4	4	4	10	14	14	9	9	9	0	0	2
P47086		NP_012545.1;	J1438 YJR83.26	261	10	17	24	10	23	28	10	10	10	8	8	8	6	6	6	10	15	15	10	25	30	0	1	3
P22224	SEC15	NP_011281.1;		910	7	11	19	10	15	28	9	9	15	5	5	24	5	5	5	10	21	35	10	16	33	1	1	2
P52286	SKP1	NP_010615.3;	D9798.14	194	10	21	32	5	5	28	6	6	19	5	9	28	5	5	20	10	25	50	4	4	25	0	2	3
P35194	UTP20	NP_009551.2	YBL0101	2493	10	25	35	10	25	28	10	14	14	4	4	4	4	4	4	10	15	15	10	18	18	2	4	6
P38758	TDA3	NP_011873.1		523	9	19	19	10	21	28	10	14	14	3	6	6	4	11	18	10	11	11	10	23	23	0	3	3
P23201	SPA2	NP_013079.1;	L1209	1466	9	13	28	8	8	28	6	6	10	3	3	17	5	5	5	10	12	23	10	10	22	0	1	4
P25298	RNA14	NP_013777.1;	YM9796.14	677	10	25	39	10	25	28	10	23	24	2	11	14	7	18	18	10	25	31	10	14	14	0	1	2
Q12004	TFB4	NP_015381.1;		338	10	25	26	10	22	28	10	15	15	0	3	3	5	5	5	10	25	25	10	21	28	1	2	4
Q06137		NP_013449.1;		509	6	16	30	10	25	28	10	21	34	0	5	12	5	10	10	10	17	17	6	10	21	0	1	4
P47176	BAT2	NP_012682.1	J2209	376	10	25	38	10	25	28	9	20	23	0	10	11	4	11	16	10	25	25	10	22	22	1	4	6
Q06103	RPN7	NP_015433.1;	P8283.8	429	10	25	33	10	22	28	9	9	9	0	0	0	2	2	2	9	9	9	8	8	8	1	1	4
Q05635	RNH202	NP_010565.3;		350	10	19	34	6	11	28	8	9	12	0	0	1	5	8	21	9	9	9	9	9	9	0	1	3
P23180	AIM17	NP_011842.1;		465	10	24	38	10	21	28	6	6	6	0	1	1	5	5	5	9	9	9	3	3	3	0	0	1
Q12690	RPL13A	NP_010201.1		199	10	18	43	5	5	28	8	8	23	0	2	17	3	3	3	7	7	7	8	8	8	2	4	7
P40212	RPL13B	NP_013862.1	YM9375.11C	199	10	17	37	5	5	28	8	8	19	0	2	13	3	3	3	7	7	7	7	7	7	2	4	7
P53312	LSC2	NP_011760.3;	G8625	427	9	12	12	10	25	28	6	6	6	0	0	0	3	3	6	7	7	7	5	5	9	1	2	2
Q04410	GRH1	NP_010805.1;		372	9	12	12	3	11	28	4	4	4	0	0	0	1	1	1	6	6	6	0	0	0	1	1	1
P38120	MRPS9	NP_009704.1;	YBR1123	278	9	21	39	10	19	28	3	3	3	0	0	0	2	2	2	6	6	6	3	3	6	0	0	2
P49167	RPL38	NP_013429.1	L8543.2	78	10	23	46	5	8	28	5	5	5	0	0	4	2	2	2	5	5	5	2	2	2	1	3	9
P09798	CDC16	NP_012903.1		840	4	4	18	0	3	28	0	0	18	0	0	20	0	0	11	4	5	30	0	0	23	1	4	5
P43132	BRE2	NP_013115.1;		505	10	11	28	3	8	28	6	11	28	0	9	23	2	3	7	3	8	11	3	7	18	1	2	4
Q04632	COG8	NP_013640.1;		607	8	10	23	10	20	28	3	3	3	0	0	2	4	4	4	3	3	3	0	0	0	0	1	2
P04806	HXK1	NP_116711.3		485	10	18	18	10	25	27	10	20	20	10	22	22	3	6	6	10	19	19	10	18	18	2	4	6
P35732	DEF1	NP_012869.1	YKL308	738	10	21	29	10	25	27	10	19	19	10	21	21	4	12	12	10	25	26	10	19	19	1	5	5
P38339	RGD1	NP_009819.1	YBR1728	666	10	23	29	10	25	27	10	21	21	10	18	18	4	17	19	10	25	41	10	25	28	2	3	5
P32786	RRN6	NP_009539.2;	YBL0311 YBL0312	894	10	16	29	10	17	27	10	10	13	7	10	23	7	11	11	10	23	23	10	24	35	0	0	3
P32867	SSO1	NP_015092.1;	P1405	290	8	8	8	10	25	27	9	20	20	5	17	18	4	4	5	9	9	9	9	21	21	0	0	2
Q3E833	PCC1	NP_878113.4		88	10	24	40	10	25	27	9	9	9	3	3	3	5	5	10	9	9	9	10	11	11	2	3	6
P32854	PEP12	NP_014679.1;	OR26.29	288	10	22	22	10	23	27	10	12	12	2	2	2	6	18	18	10	11	11	10	17	17	0	0	1
P42837	FIG4	NP_014074.1;	N0330	879	7	22	44	10	25	27	10	16	16	2	3	3	4	13	13	10	24	24	10	24	24	0	2	6
Q12192	RFM1	NP_014922.3;		310	10	19	30	10	24	27	7	7	7	2	2	2	6	6	6	10	14	14	4	4	4	1	2	6
Q06217	SMD2	NP_013377.1;	L9328.5	110	10	16	27	10	25	27	10	11	11	1	1	1	4	4	4	10	14	14	8	8	8	1	1	2
Q04370	PEX12	NP_013739.1;	YM9711.16C	399	9	24	24	10	25	27	10	23	23	0	2	2	5	20	22	10	25	31	10	25	30	0	0	0
Q12328	TIM22	NP_010064.1;	D0884	207	9	22	22	4	19	27	9	20	27	0	12	19	3	4	13	10	25	26	10	25	29	0	2	3
P34230	PXA2	NP_012733.1;	YKL741	853	5	5	26	6	6	27	3	3	16	0	0	16	3	3	16	9	9	33	7	7	29	1	1	4
P41805	RPL10	NP_013176.1		221	10	25	37	10	25	27	10	23	23	0	4	4	1	8	8	8	8	8	4	4	8	0	3	7
P20604	SIT4	NP_010236.1	D2693	311	10	11	11	10	24	27	8	8	8	0	0	0	4	4	4	8	8	8	6	6	13	0	3	4
Q03148	SNZ1	NP_013814.1	YM6543.03	297	8	16	22	6	6	27	6	6	6	0	0	0	5	5	5	8	8	8	5	5	7	2	3	5
P10849	MTF2	NP_010240.1;	D2705	440	10	12	34	5	5	27	3	3	3	0	0	13	5	5	5	7	7	7	5	5	5	1	1	4
P42949	PAM16	NP_012431.1;	J0822	149	3	3	23	3	3	27	2	2	3	0	0	18	0	0	13	6	6	19	3	3	23	0	1	3
Q12511	PTC5	NP_014733.1	YOR3157C	572	10	25	33	8	15	27	7	7	7	0	0	0	4	4	4	5	5	5	3	3	10	1	4	6
P35727	BLI1	NP_012862.1;	YKL321	113	7	7	20	6	6	27	5	5	5	0	0	0	4	4	4	5	5	5	4	4	4	1	2	4
P39112	DSS1	NP_014014.1;	YM8021.13C	969	7	22	47	3	3	27	3	3	24	0	0	22	0	0	0	5	5	28	0	0	18	1	1	5
P20050	HOP1	NP_012193.3		605	10	19	19	10	25	26	10	15	15	10	16	16	3	3	3	10	15	15	10	16	16	3	5	5
P04911	HTA1	NP_010511.3	YD9934.10	132	10	25	39	10	25	26	10	17	17	10	15	15	7	9	9	10	25	25	10	25	36	2	4	4
P04912	HTA2	NP_009552.1	YBL0103	132	10	25	39	10	25	26	10	17	17	10	15	15	7	9	9	10	25	25	10	25	35	2	4	4
P21827	SRM1	NP_011418.1		482	10	22	22	10	25	26	10	25	26	7	20	20	5	5	5	10	19	19	10	25	33	1	4	5
Q00764	TPS1	NP_009684.1;	YBR0922	495	10	25	26	10	16	26	9	9	9	6	6	6	4	4	4	10	13	13	10	17	17	1	1	2
Q04067	TIF35	NP_010717.1;	D9461.16	274	9	24	42	10	13	26	9	9	9	6	6	6	2	2	2	8	8	8	7	7	11	0	1	8
P53280	CAF130	NP_011650.3		1122	10	25	39	10	25	26	10	17	17	3	7	7	3	9	10	10	25	30	10	25	27	3	3	6
P0CX36	RPS4B	NP_012073.1;NP_012679.3		261	10	15	25	10	16	26	10	10	10	3	3	3	2	4	16	10	11	11	9	9	21	3	4	5
P0CX35	RPS4A	NP_012073.1;NP_012679.3	J2186	261	10	15	25	10	16	26	10	10	10	3	3	3	2	4	16	10	11	11	9	9	21	3	4	5
P47050	RTT101	NP_012488.3;	J1166	842	9	24	33	10	24	26	10	13	13	2	8	10	3	3	3	10	25	35	10	25	37	1	1	2
Q00582	GTR1	NP_013585.1	YM7056.05	310	7	17	21	10	25	26	10	15	15	0	0	0	4	14	14	10	16	16	10	25	27	2	3	3
P33448	TOM6	NP_014688.1;		61	3	13	13	10	25	26	10	17	17	0	2	2	4	11	11	10	25	25	10	24	24	0	1	2
P32807	YKU70	NP_014011.1;	YM8021.10	602	9	18	18	10	17	26	8	8	8	0	0	0	6	13	13	10	22	22	10	22	27	0	1	2
P52490	UBC13	NP_010377.3	YD6652.04	153	8	23	35	10	20	26	8	14	23	0	4	7	2	9	15	10	10	10	6	6	10	2	3	3
P40368	NUP82	NP_012474.1;	HRB187 J1135	713	9	19	25	10	25	26	6	6	6	0	0	0	4	4	4	10	20	20	10	11	11	0	0	0
P09734	TUB3	NP_013582.1;	YM7056.02C	445	5	9	9	5	5	26	4	4	12	0	0	9	4	4	21	10	12	27	0	0	20	0	0	3
P09733	TUB1	NP_013625.1;		447	5	8	8	5	5	26	4	4	12	0	0	9	4	4	25	10	12	28	0	0	17	0	0	3
P07834	CDC4	NP_116585.1;		779	10	14	26	5	7	26	4	4	10	0	1	21	5	13	13	9	9	33	10	10	22	0	0	1
P38132	MCM7	NP_009761.4;	YBR1441	845	10	13	24	6	6	26	4	4	19	0	0	16	3	3	3	9	9	23	6	6	22	0	0	1
Q01855	RPS15	NP_014602.1		142	10	25	46	9	9	26	7	7	7	0	0	0	2	2	2	8	8	8	10	11	16	2	4	5
P38688	SRP72	NP_015114.2;		640	5	5	5	10	25	26	6	6	6	0	0	0	4	4	4	8	8	8	4	7	7	1	1	2
Q04712	RRN11	NP_013669.1	YM9827.09C	507	9	18	42	4	4	26	4	4	18	0	0	18	5	5	18	8	13	38	4	4	27	0	3	5
P47076	RPC17	NP_012523.2	J1349	161	8	13	31	6	6	26	4	4	16	0	0	11	1	1	9	8	8	29	0	0	18	1	4	9
P32590	SSE2	NP_009728.1;	YBR1221	693	10	12	35	6	6	26	6	6	7	0	0	2	7	8	24	7	7	7	10	12	29	0	0	0
P36123	SAP190	NP_012953.2;		1033	9	16	32	5	5	26	4	4	19	0	0	16	4	4	23	7	7	27	10	11	19	1	2	4
P12687	MRP7	NP_014393.1;	N2007	371	7	14	39	4	4	26	4	4	22	0	0	18	6	6	18	7	7	30	7	7	30	0	1	5
P48589	RPS12	NP_015014.3;		143	6	21	31	10	20	26	9	9	9	0	0	0	2	2	2	6	6	6	4	4	6	0	0	2
P40160	RIO2	NP_014192.1;	N1342	425	9	17	38	7	10	26	7	7	16	0	0	12	3	3	3	6	6	6	7	7	17	1	1	1
Q12338	RNH203	NP_013255.1;		110	10	24	40	5	5	26	5	5	7	0	0	5	4	4	5	6	6	14	5	5	13	1	1	6
P36528	MRPL17	NP_014147.1	N0864	281	4	16	24	6	18	26	6	6	6	0	0	0	3	3	3	5	5	5	3	13	13	2	4	7
P25615	POL4	NP_009940.2	YCR14C	582	8	16	19	10	25	26	5	5	5	0	0	0	2	12	12	4	4	4	4	4	4	2	4	7
P81449	TIM11	NP_010609.1;	YDR322BC	96	3	9	9	5	5	26	2	2	2	0	0	0	5	5	5	4	4	4	2	2	2	0	0	8
P40858	MRPL49	NP_012439.2;	J0904	161	10	22	47	0	2	26	1	1	5	0	0	7	1	6	9	4	4	20	0	0	18	1	1	5
P0CX86	RPL41A	NP_010097.1;NP_010148.1	D1290	25	10	25	25	10	25	25	10	25	25	10	25	25	2	3	3	10	25	25	5	10	10	3	7	7
P0CX87	RPL41B	NP_010097.1;NP_010148.1	YDL133BC	25	10	25	25	10	25	25	10	25	25	10	25	25	2	3	3	10	25	25	5	10	10	3	7	7
Q12417	PRP46	NP_015174.1;	P2594	451	10	15	21	10	10	25	8	8	8	5	5	7	6	6	6	9	9	9	10	13	23	1	2	3
P40085	EMP65	NP_011067.3		556	10	25	40	10	23	25	10	13	13	3	3	3	2	2	2	10	25	46	10	23	28	2	4	6
P33201	MRT4	NP_012916.1	YKL160	236	10	25	32	10	25	25	10	16	16	3	7	7	3	3	3	10	22	22	6	6	6	2	5	5
P18898	CDC43	NP_011360.1	G1864	376	10	13	24	10	17	25	10	13	13	2	2	2	5	5	5	10	11	11	10	11	18	0	3	3
Q06096	COG4	NP_015430.1;	P8283.16	861	10	12	12	10	17	25	9	9	9	2	2	2	4	4	4	10	23	23	10	18	18	1	2	4
P26798	INO2	NP_010408.1;	YD9727.18C	304	7	8	8	6	6	25	6	6	6	2	2	13	3	3	6	8	8	8	8	8	8	0	0	0
Q12143	NSL1	NP_015091.1;		216	10	12	23	10	10	25	9	9	9	1	1	4	5	5	5	9	9	9	8	8	22	2	2	5
Q02647	DYN2	NP_010712.1		92	10	22	37	10	25	25	10	10	10	0	0	0	6	6	6	10	10	10	10	11	11	1	4	8
Q05543	RTT103	NP_010575.1;		409	7	15	19	10	25	25	10	10	10	0	0	0	6	6	6	10	24	24	8	15	15	1	1	4
Q03921	DOP1	NP_010425.1	YD9302.17C	1698	10	23	27	10	25	25	10	11	11	0	0	0	4	6	6	10	22	22	7	7	7	1	5	5
P25847	MSH2	NP_014551.1	O0935	964	10	25	36	10	21	25	9	9	9	0	0	0	4	4	4	10	12	12	7	7	7	1	3	7
Q00618	BET4	NP_012503.2	J1254	327	10	25	41	10	25	25	9	9	9	0	0	0	3	3	3	10	13	13	6	6	6	3	6	9
P53930	YAF9	NP_014292.3	N1966	226	10	25	30	10	13	25	9	10	14	0	0	8	3	5	16	10	11	11	4	6	21	2	4	5
P53292	MRPS35	NP_011681.1;		345	10	25	46	10	16	25	8	8	13	0	0	5	8	11	17	10	15	15	10	18	31	1	1	5
P31386	ATS1	NP_009382.2;	FUN28 YAL006	333	7	19	31	4	17	25	7	17	25	0	11	17	5	20	33	10	25	28	10	25	34	0	0	1
P17255	VMA1	NP_010096.1;	D1286	1071	5	20	25	10	25	25	7	7	7	0	0	0	2	2	2	10	25	27	8	8	8	1	2	3
P00899	TRP2	NP_011014.1;		507	10	12	12	10	25	25	7	10	10	0	7	7	5	5	5	10	17	17	4	11	12	1	2	3
P38344	REI1	NP_009825.4;	YBR1736	393	10	18	30	7	15	25	5	5	5	0	1	12	7	7	7	10	21	21	6	13	14	0	0	2
P07213	TOM70	NP_014278.3;	N1905	617	6	6	23	5	5	25	4	4	17	0	0	15	5	5	7	10	25	50	6	6	24	2	2	7
Q04347	BUD22	NP_013727.1;	YM9711.01	519	9	10	28	8	8	25	7	7	7	0	0	0	5	5	5	9	9	9	6	6	6	1	2	10
P46671	FAR3	NP_013767.1;	YM9796.05	204	9	10	24	8	11	25	6	6	6	0	0	0	9	9	9	9	9	9	9	9	16	0	1	3
P50278	SOL1	NP_014432.3;	N3291	321	6	6	27	5	5	25	4	4	19	0	0	19	4	4	13	9	9	32	6	6	20	1	1	4
Q08622	GEP3	NP_014848.1;		556	9	14	38	3	3	25	1	1	13	0	0	11	3	3	23	9	10	35	0	0	19	0	2	6
P32899	IMP3	NP_012018.1		183	10	25	40	10	20	25	8	8	10	0	0	4	0	0	0	8	8	8	4	5	7	3	6	7
Q12124	MED2	NP_010279.3;	D2930	431	10	25	32	10	25	25	9	11	11	0	11	11	6	8	8	7	7	7	10	25	25	0	0	3
P28495	CAP1	NP_012918.1;	YKL155	268	5	16	16	10	22	25	7	7	7	0	0	0	3	9	9	7	7	7	5	5	5	1	2	4
P07342	ILV2	NP_013826.1;	YM9718.07	687	10	18	27	4	4	25	5	5	8	0	0	2	3	3	11	7	7	29	5	5	18	1	2	2
P49723	RNR4	NP_011696.3		345	7	17	21	10	25	25	10	13	13	0	1	1	3	3	3	6	6	6	10	23	23	1	4	7
P41834	UFE1	NP_014718.1;	YOR29-26	346	7	13	28	4	8	25	5	5	14	0	2	11	4	4	4	6	6	6	7	7	7	1	1	2
P54780	RPL15B	NP_013840.1	YM8564.03C	204	8	20	45	10	15	25	5	5	15	0	0	11	1	1	1	5	5	5	0	0	10	1	3	5
P05748	RPL15A	NP_013129.1		204	8	19	42	10	15	25	5	5	15	0	0	11	1	1	1	5	5	5	0	0	7	1	3	5
P81450	ATP18	NP_013629.1;	YML081BC	59	10	13	28	4	4	25	2	2	4	0	0	0	3	3	15	4	4	4	5	5	5	2	2	5
P43585	VTC2	NP_116651.1		828	6	13	32	2	2	25	2	2	2	0	0	3	2	5	16	2	2	24	3	3	13	1	3	8
P25382	RSA4	NP_009997.2	YCR72C	515	10	23	34	10	24	24	10	21	21	10	22	23	6	6	14	10	19	19	10	15	17	2	4	6
P19659	GAL11	NP_014591.1;		1081	10	17	17	10	18	24	10	15	15	10	17	23	5	5	14	10	20	20	10	13	19	1	2	4
P40567	MSL1	NP_012274.1;	YIB9W	111	10	25	29	10	24	24	10	20	20	10	19	19	1	1	1	10	24	24	10	18	18	2	2	4
Q08553	SYC1	NP_014822.1;		188	10	25	27	10	24	24	10	19	19	10	18	18	5	18	18	10	23	23	10	24	24	2	2	3
P32501	GCD6	NP_010497.3	YD8142.12 YD8142B.03	712	10	24	38	10	24	24	10	21	21	10	18	18	4	14	14	10	24	24	10	25	25	4	5	6
P37838	NOP4	NP_015282.1;		685	10	22	24	10	24	24	10	19	19	10	18	18	2	11	11	10	22	22	10	25	25	0	2	2
P33399	LHP1	NP_010232.1;		275	10	22	22	10	24	24	10	17	17	10	17	17	2	2	2	10	20	20	10	19	19	1	2	3
P53187	HOP2	NP_011482.3		214	10	16	16	10	20	24	10	13	13	10	14	14	4	4	4	10	18	18	10	11	11	3	4	7
P38304	MED8	NP_009752.3;	YBR1403	223	8	14	14	10	23	24	10	18	18	10	16	16	6	21	24	10	20	20	10	20	21	0	0	0
P23301	HYP2	NP_010880.3;	SYGP-ORF21	157	7	17	24	10	18	24	10	13	13	10	15	18	5	5	11	10	17	17	10	20	28	0	0	5
P32524	PRP21	NP_012332.1	J0322	280	10	16	26	10	13	24	9	9	10	10	14	15	3	3	3	8	8	8	8	8	8	1	3	7
P53886	APC1	NP_014227.4;	N1677	1748	10	24	26	10	24	24	10	24	24	9	17	17	8	23	29	10	24	24	10	24	24	1	1	2
P38784	VMA22	NP_011927.1 [P38784-1];		181	9	12	23	10	16	24	10	10	10	9	10	10	3	3	3	10	13	13	10	14	16	0	0	1
P41819	DIM1	NP_015057.1		318	10	20	20	10	24	24	10	10	10	8	14	14	3	3	3	10	24	29	10	25	35	4	6	9
P33775	PMT1	NP_010188.1	D2390	817	10	25	29	10	24	24	10	21	21	8	11	11	2	7	7	10	18	18	10	23	23	2	3	5
P38074	HMT1	NP_009590.1	YBR0320	348	10	21	21	10	24	24	10	15	15	6	8	8	4	4	4	10	25	28	10	16	16	2	4	4
P50101	UBP15	NP_014033.1;	YM9952.06	1230	9	20	27	10	24	24	10	13	13	6	8	8	5	19	23	10	17	17	10	25	25	0	1	1
P38255	RXT2	NP_009653.2;	YBR0822	430	10	25	42	10	24	24	9	9	9	6	9	9	6	6	6	10	16	16	10	20	20	1	2	6
P53336		NP_011799.3		341	10	25	33	10	24	24	10	15	15	4	6	6	2	2	2	10	22	22	10	23	23	3	7	10
Q08746	RRS1	NP_014937.1;		203	10	17	36	7	7	24	7	7	9	4	4	21	5	5	9	7	7	17	10	13	13	1	2	5
Q07457	BRE1	NP_010209.1		700	10	23	30	10	24	24	10	11	11	1	3	3	3	3	3	10	20	20	8	8	8	3	3	5
P53865	CNM67	NP_014174.1;	N1264	581	10	22	29	6	19	24	9	18	24	1	15	31	6	18	29	5	7	10	10	25	30	0	1	2
Q03940	RVB1	NP_010476.1;		463	10	20	32	10	24	24	10	21	21	0	9	9	3	12	12	10	25	36	10	25	41	1	1	3
P43588	RPN11	NP_116659.1;		306	9	24	24	10	24	24	10	18	18	0	6	6	2	11	11	10	17	17	10	25	25	0	2	4
P39104	PIK1	NP_014132.1	N0795	1066	10	15	15	10	24	24	8	8	8	0	0	0	5	5	5	10	14	14	10	15	15	3	6	7
P39079	CCT6	NP_010474.3;	YD9395.21	546	10	18	34	10	19	24	8	8	8	0	0	0	3	3	7	10	11	11	10	10	10	1	2	4
P53096	HOS2	NP_011321.1;	G1330	452	10	19	19	10	17	24	8	8	8	0	0	0	5	5	5	10	12	12	10	11	11	1	2	5
P36037	DOA1	NP_012709.1;		715	7	21	42	10	18	24	8	8	8	0	0	0	3	3	3	10	10	10	10	13	13	1	2	3
P39708	GDH3	NP_009339.1;	FUN51	457	9	10	23	10	24	24	8	8	8	0	0	0	3	3	3	10	10	10	5	5	5	0	2	4
P38811	TRA1	NP_011967.1;		3744	3	14	14	10	24	24	8	8	8	0	0	0	2	2	2	10	11	11	3	3	3	0	0	0
Q00723	PRP38	NP_011589.3;		242	6	18	39	10	20	24	7	7	7	0	0	0	3	3	3	10	13	13	10	21	21	0	1	3
P21190	IME1	NP_012627.1;	J1916	360	6	6	6	8	8	24	7	7	19	0	0	8	2	2	19	10	10	10	10	22	34	1	1	1
P33338	SLA2	NP_014156.2	N1102	968	7	17	26	10	24	24	7	7	7	0	0	0	4	4	4	10	22	22	5	5	5	1	5	7
P39968	VAC8	NP_010903.3;		578	10	22	22	10	24	24	6	9	9	0	0	0	5	9	15	10	24	24	6	12	12	1	1	3
P00925	ENO2	NP_012044.1;		437	8	23	47	6	10	24	6	6	11	0	1	10	3	3	3	10	18	33	3	6	9	1	1	2
P26448	BUB2	NP_013771.1;	YM9796.08C	306	9	14	26	10	16	24	5	5	5	0	0	0	6	6	6	10	11	15	9	9	17	0	0	1
P09457	ATP5	NP_010584.1;	D9740.11	212	5	15	19	10	24	24	4	4	4	0	0	0	3	3	3	10	25	50	0	11	11	0	1	2
P07262	GDH1	NP_015020.3;		454	7	8	23	10	24	24	10	12	12	0	0	0	2	2	2	9	9	9	5	5	5	0	0	1
P30656	PRE2	NP_015428.1;	P8283.10	287	10	13	13	6	10	24	6	6	7	0	0	0	3	3	3	9	9	9	9	9	14	0	1	1
P38828	LSM12	NP_011989.1;		187	9	17	40	5	5	24	4	4	5	0	0	2	5	5	5	8	8	8	6	6	6	0	1	3
P40075	SCS2	NP_011046.3;		244	10	19	27	7	18	24	6	6	6	0	0	0	4	4	4	7	7	7	4	4	4	0	1	4
P05744	RPL33A	NP_015182.1	LPI4W P2625	107	10	25	37	10	24	24	8	9	9	0	0	0	1	1	1	6	6	6	4	4	4	1	3	5
P41056	RPL33B	NP_014877.3	O5224	107	10	25	36	10	24	24	8	9	9	0	0	0	1	1	1	6	6	6	4	4	4	1	3	5
P32570	SRB6	NP_009812.1;	YBR1721	121	5	5	13	7	7	24	6	6	12	0	0	9	2	2	10	6	6	6	9	9	21	1	2	2
Q05778	PBA1	NP_013300.2		276	10	14	21	10	24	24	6	6	6	0	0	0	4	4	4	5	5	5	10	11	11	1	3	4
P25491	YDJ1	NP_014335.1	N2418 YNL2418C	409	10	20	29	5	5	24	3	3	8	0	0	6	2	2	6	5	5	5	4	4	11	2	4	9
P47150	RSM7	NP_012647.1;	J2020	247	6	18	37	2	2	24	2	2	6	0	0	11	0	0	4	5	5	13	0	0	12	0	0	1
P40157	VID27	NP_014187.1	N1327	782	6	20	30	10	17	24	7	7	7	0	0	0	3	7	8	4	4	4	0	0	0	2	3	6
Q01159	CEG1	NP_011385.3;	G2853	459	6	18	24	6	6	24	6	6	12	0	0	6	1	7	23	4	4	4	10	13	28	0	0	4
P38426	TPS3	NP_013988.1;	YM8156.03C	1054	5	12	27	0	2	24	2	2	13	0	5	25	2	2	2	3	3	14	0	0	10	0	0	3
P38276		NP_009695.2	YBR1013	179	10	25	26	10	24	24	5	5	5	0	0	0	1	1	1	0	0	0	0	0	0	2	3	5
P47035	NET1	NP_012459.1;	J1038	1189	3	9	9	3	3	24	3	3	6	0	0	3	2	4	4	0	0	0	0	0	6	1	1	1
O42831				157	5	9	17	2	2	24	1	1	1	0	0	0	2	2	14	0	0	0	0	0	5	1	2	4
P38352	SAF1	NP_009839.4;	YBR2017	637	10	19	27	10	17	23	10	17	17	10	14	14	2	7	7	10	19	19	10	18	18	1	1	3
P38682	GLO3	NP_011048.1;		493	10	15	15	10	23	23	10	17	17	9	9	9	5	5	20	10	17	17	10	16	16	0	1	2
P43639	CKB1	NP_011496.3;		278	9	22	22	10	23	23	10	18	18	9	21	21	4	19	19	10	24	24	10	25	36	0	0	0
P21825	SEC62	NP_015231.2;	LPG14C	274	10	17	29	10	18	23	9	9	9	9	10	11	6	12	12	10	22	22	10	18	18	0	0	4
P25632	RSC6	NP_009981.1;	YCR52W	483	10	25	34	8	8	23	8	8	8	8	12	12	5	17	17	10	10	10	10	14	15	0	1	3
P10363	PRI1	NP_012273.1	YIB8C	409	10	14	14	10	17	23	8	8	8	6	6	6	8	13	23	10	15	15	10	14	18	1	3	4
P23293	SGV1	NP_015487.1	P9584.8	657	10	25	50	10	23	23	10	10	10	5	5	5	6	7	7	10	15	15	10	13	13	0	5	9
P54885	PRO2	NP_014968.1	O6155	456	3	16	17	10	23	23	9	9	9	5	5	5	5	5	5	10	14	14	10	16	16	1	3	6
P53969	SAM50	NP_014372.1;	N2802	484	10	25	34	10	23	23	10	10	10	4	4	4	7	18	18	10	13	13	10	25	36	0	0	1
P24871	CLB4	NP_013311.1;	L8167.3	460	10	15	23	7	10	23	9	11	11	4	13	16	4	4	4	7	7	7	10	16	16	0	0	4
P52489	PYK2	NP_014992.3;	O6342	506	6	21	30	10	23	23	10	11	12	2	7	9	2	2	6	8	8	8	0	0	0	0	1	3
P46964	OST2	NP_014746.2	YOR3211C	130	10	20	21	10	23	23	10	10	10	0	0	0	5	6	6	10	18	18	10	16	16	3	3	8
P40565	IST3	NP_012270.1;	YIB5W	148	8	19	19	10	23	23	10	10	10	0	0	0	3	3	3	10	19	19	9	21	23	2	2	3
P47190	PMT3	NP_014966.1;	O6148	753	9	20	27	10	14	23	9	9	9	0	0	0	5	5	5	10	12	12	10	13	13	0	2	5
P08518	RPB2	NP_014794.3;		1224	8	15	15	10	23	23	9	14	14	0	1	1	4	15	15	10	25	25	10	25	26	1	1	2
P46957	POL31	NP_012539.1;	J1427 YJR83.7	487	7	22	47	10	23	23	9	14	15	0	0	0	3	3	3	10	19	19	10	20	20	1	1	4
P33322	CBF5	NP_013276.1;	L9470.11	483	9	22	33	7	13	23	9	9	9	0	0	0	4	4	18	10	16	20	10	19	32	2	2	5
Q03096	EST3	NP_012256.1 [Q03096-1]		181	8	15	15	10	13	23	8	8	14	0	0	2	4	4	14	10	12	12	10	12	34	2	3	4
P17157	PHO85	NP_015294.1	P7102.18A	305	6	9	23	10	12	23	8	8	8	0	0	0	4	4	4	10	12	12	10	17	22	1	3	6
P40422	RPC10	NP_012013.1;	YHR143BW	70	10	17	32	7	15	23	8	8	8	0	0	0	5	5	5	10	25	25	5	5	5	0	0	3
P17883	SKI3	NP_015515.1	P9677.7	1432	6	18	19	10	23	23	8	8	8	0	0	0	2	2	2	10	15	15	1	1	1	2	3	6
Q12165	ATP16	NP_010280.1;	D2935 YD8119.03	160	10	14	17	10	20	23	6	6	6	0	0	0	3	3	3	10	13	13	3	3	3	1	2	3
P00924	ENO1	NP_011770.3;	G9160	437	8	23	48	6	10	23	6	6	9	0	1	4	3	3	3	10	18	33	3	5	5	1	1	2
P06701	SIR3	NP_013547.3;	L9753.10	978	10	25	50	5	10	23	5	5	9	0	1	4	5	5	9	9	16	28	7	7	14	2	2	4
Q99189	MTR10	NP_014803.1;		972	6	12	12	10	20	23	6	6	6	0	0	0	4	4	4	7	11	11	8	12	12	0	1	3
P08466	NUC1	NP_012327.1;	HRE329 J0310	329	3	4	10	3	3	23	2	2	20	0	0	18	3	3	23	7	7	19	0	0	17	0	1	2
P54860	UFD2	NP_010091.2;	D1255	961	9	20	30	5	18	23	10	14	14	0	3	3	2	10	10	6	6	6	3	3	3	0	1	1
P53202	CUL3	NP_011517.1		744	10	20	20	8	23	23	6	6	6	0	0	0	4	4	4	6	6	6	6	6	6	3	4	6
P22135	ATP12	NP_012355.1;	J0486	325	9	19	43	4	4	23	3	3	19	0	0	16	3	3	21	6	6	25	5	5	23	1	2	3
P53600	RET3	NP_015315.1;	LPA7W YP8132.03	189	5	5	13	5	5	23	3	3	12	0	0	3	4	4	10	6	6	6	4	4	12	0	1	4
P36057	SRP102	NP_012768.1;	YKL609	244	3	3	27	3	3	23	0	0	0	0	0	0	3	3	9	6	6	6	4	4	19	0	1	5
P41807	VMA13	NP_015361.1;	YP3085.02	478	10	16	21	6	6	23	6	6	6	0	0	0	5	5	5	5	5	5	3	3	3	1	1	2
P25651	CSM1	NP_010009.1;	YCR86W	190	3	10	14	6	6	23	6	6	6	0	0	0	6	6	6	5	5	5	2	2	2	1	2	6
P22214	SEC22	NP_013370.1;	L8479.3	214	9	18	37	4	10	23	6	6	6	0	0	0	2	12	12	5	5	5	0	0	0	1	1	4
Q04599	MRPL1	NP_010401.1	YD9727.11C	285	9	18	38	2	2	23	1	1	13	0	0	12	2	2	9	5	5	16	4	4	26	1	3	7
P40957	MAD1	NP_011429.3;		749	3	14	14	3	3	23	1	1	12	0	0	12	1	1	18	5	5	23	0	0	19	0	2	3
Q12157	APC11	NP_010276.3;	D2900	165	6	18	18	5	10	23	6	7	13	0	2	9	3	9	30	4	13	23	5	15	28	2	2	2
P00830	ATP2	NP_012655.3;	J2041	511	5	16	24	10	23	23	5	5	5	0	0	0	4	4	4	4	4	10	3	3	7	0	2	4
P40360	ARG2	NP_012464.1;	HRB574 J1091	574	5	17	24	2	8	23	3	3	3	0	0	4	0	0	6	4	4	4	0	4	11	1	2	5
Q12748	CTF3	NP_013485.1;		733	1	12	12	3	13	23	2	2	2	0	0	0	3	3	3	4	4	4	0	0	0	0	1	3
P34253	KTI12	NP_012812.1;	YKL446 YKL500	313	8	11	28	2	2	23	3	3	3	0	0	0	5	6	6	0	0	0	0	0	0	0	2	5
P47912	FAA4	NP_013974.1;	YM9408.08	694	8	23	40	10	22	22	10	21	21	3	16	18	4	4	4	10	23	23	10	21	25	0	0	1
P53853	VPS75	NP_014153.1;	N0890	264	7	15	26	10	22	22	10	10	10	3	3	3	4	4	4	10	13	13	10	12	12	0	2	5
P38238	TRM7	NP_009617.3	YBR0527	310	10	22	22	10	22	22	10	11	11	2	2	2	6	6	6	10	13	13	9	9	9	3	5	7
Q12309	CLF1	NP_013218.1;	L2952	687	10	21	45	8	8	22	9	9	9	2	2	2	6	6	6	7	7	7	7	7	7	0	2	4
Q06705	CSR1	NP_013484.3;		408	9	9	18	8	8	22	5	5	5	1	1	9	5	5	23	10	16	37	9	9	30	0	1	4
P0CX53	RPL12A	NP_010706.3;NP_010860.1;		165	7	7	21	7	7	22	5	5	5	1	1	1	5	5	15	8	8	8	5	5	6	2	2	7
P0CX54	RPL12B	NP_010706.3;NP_010860.1;	D9461.7	165	7	7	21	7	7	22	5	5	5	1	1	1	5	5	15	8	8	8	5	5	6	2	2	7
Q12046	CWC2	NP_010072.1	D1041	339	10	25	26	10	22	22	10	10	10	0	2	2	4	4	4	10	19	19	7	17	18	2	3	4
P23255	TAF2	NP_009971.1;	YCR42C YCR724	1407	10	22	22	10	22	22	9	9	9	0	0	0	6	6	6	10	12	12	10	18	18	1	2	3
P87108	TIM10	NP_011869.1;	YHR005BC	93	10	12	14	10	21	22	9	9	9	0	0	0	5	7	7	10	18	18	10	17	17	0	1	4
Q08387	DNL4	NP_014647.1;	UND407 UNE452	944	10	15	28	10	14	22	9	9	9	0	0	0	4	12	16	10	18	18	10	18	28	0	1	4
P32074	SEC21	NP_014112.1	N0543	935	9	18	28	10	20	22	9	9	9	0	0	0	2	12	16	10	17	17	10	18	18	2	3	4
Q06078	UTP21	NP_013513.3	L8084.22	939	10	25	32	10	22	22	8	8	8	0	0	0	2	2	13	10	20	20	10	22	22	3	5	5
P25559	DCC1	NP_009913.2;	YCL16C	380	10	13	22	10	12	22	7	7	7	0	0	0	4	4	4	10	12	12	10	13	13	0	1	4
P25655	CDC39	NP_010017.2;	YCR1151 YCR93W	2108	9	20	20	10	21	22	7	7	7	0	0	0	5	5	5	10	22	22	10	19	19	0	2	2
Q04651	ERV41	NP_013644.1		352	10	25	27	7	22	22	7	7	7	0	0	0	3	3	3	10	23	23	10	25	25	1	6	6
P40562	MPH1	NP_012267.1	YIB2C	993	10	15	40	10	19	22	7	7	7	0	0	0	6	6	6	10	11	11	8	8	8	0	3	5
Q06325	YPS7	NP_010636.1;		596	2	2	22	0	3	22	0	0	17	0	0	13	1	1	24	10	23	43	0	7	25	0	0	2
P40359	PSF2	NP_012463.1;	HRF213 J1086	213	10	25	50	10	11	22	8	8	15	0	0	4	4	4	16	9	9	17	10	11	25	0	1	2
P39990	SNU13	NP_010888.1;		126	8	8	17	10	12	22	8	8	8	0	0	0	6	6	6	9	9	9	8	8	8	1	1	4
Q99257	MEX67	NP_015156.1;	P2520	599	6	6	6	10	22	22	9	9	9	0	0	0	5	5	5	8	8	8	10	20	20	0	1	1
P02994	TEF1; TEF2	NP_009676.1;NP_015405.1	P9513.7; YBR0913	458	8	20	32	7	12	22	8	8	8	0	0	0	3	11	13	7	7	7	8	16	16	2	3	8
P89102	SEC5	NP_010450.3;	YD8358.20C YD9489.01C	971	8	15	30	5	5	22	5	5	12	0	0	14	3	3	5	7	8	13	3	4	18	0	1	2
P53378	TUB4	NP_013313.1;	L8167.21	473	6	10	28	5	5	22	6	6	23	0	0	18	3	3	20	6	6	29	4	4	25	0	1	3
P38863	SPC97	NP_012042.1;		823	10	20	31	7	7	22	5	5	5	0	0	0	2	2	7	6	6	6	4	4	4	1	2	5
P53183		NP_011476.1;		348	5	11	24	6	6	22	5	5	7	0	0	0	3	3	11	5	5	14	4	4	11	1	1	7
P53079	COG1	NP_011292.1;		417	8	14	14	5	5	22	7	7	7	0	0	0	4	4	4	4	4	4	3	3	3	0	1	5
P36516	MRPL3	NP_013737.1;	YM9711.14	390	2	12	12	2	2	22	6	6	6	0	0	0	1	9	9	4	4	4	0	0	0	1	2	3
P22543	VPS34	NP_013341.1	L9672.10	875	10	17	30	3	7	22	4	4	4	0	0	0	4	4	4	4	4	4	4	4	4	0	3	6
P24867	PCL1	NP_014110.1	N0536	279	2	8	32	4	4	22	2	2	17	0	0	13	1	1	20	4	4	16	0	0	15	1	3	4
P0CX49	RPL18A	NP_014098.1;NP_014521.1		186	10	25	34	10	21	21	10	18	18	10	17	17	4	12	12	10	23	23	10	22	22	2	3	7
P0CX50	RPL18B	NP_014098.1;NP_014521.1	N0425	186	10	25	34	10	21	21	10	18	18	10	17	17	4	12	12	10	23	23	10	22	22	2	3	7
P18239	PET9	NP_009523.1	YBL0421	318	10	18	18	10	21	21	10	15	15	10	13	13	6	15	15	10	23	23	10	20	20	1	3	5
P39927	PTI1	NP_011672.1;	G6670	425	10	25	38	10	20	21	10	17	17	10	19	22	5	6	10	10	11	11	9	9	9	0	0	1
P38632	MMS21	NP_010896.3		267	10	17	17	10	21	21	10	13	13	9	11	12	5	15	15	10	16	16	10	19	19	1	3	4
Q04228	UBX2	NP_013699.1;	YM9571.05	584	10	19	24	10	21	21	10	19	19	8	20	22	4	4	5	10	19	19	10	12	12	0	1	1
P34232	MTR2	NP_012735.1;		184	10	11	11	10	19	21	10	10	10	8	8	8	6	6	6	7	7	7	10	14	14	0	2	3
P43554	SWP82	NP_116605.1;		623	10	24	26	10	21	21	10	16	16	7	13	13	5	14	14	10	18	18	10	23	23	0	2	4
Q08465	YNG1	NP_014707.1;	YOR29-15	219	10	14	23	10	13	21	7	7	7	3	3	4	5	5	5	10	12	12	10	12	21	0	0	1
O75012	MRP10	NP_010238.1		95	10	21	21	10	21	21	8	8	8	3	3	3	4	6	12	8	8	8	7	7	7	1	4	6
P38241	ECM2	NP_009621.3;	YBR0614	364	10	12	26	10	21	21	8	8	8	1	1	1	7	12	12	10	11	11	10	10	12	0	0	4
P53942	RNH201	NP_014327.1;	N2369	307	7	19	19	10	21	21	8	8	8	1	1	2	4	9	19	10	25	31	10	25	48	0	1	1
P40348	RFC2	NP_012602.3	J1808	353	10	24	37	10	21	21	9	11	11	0	2	4	4	4	4	10	22	22	10	11	11	2	4	8
P19358	SAM2	NP_010790.3	D9719.8	384	9	18	18	10	21	21	8	8	8	0	0	0	5	15	15	10	15	15	10	16	16	2	3	5
P52918	MSN5	NP_010622.1;	D9651.5	1224	9	19	19	8	16	21	7	7	8	0	0	0	5	5	5	10	17	19	7	12	12	0	1	3
Q06708	VAC14	NP_013490.3	L3502.1	880	10	14	20	10	21	21	6	6	6	0	0	0	4	4	4	10	11	11	10	11	11	2	6	8
P53881	MRPL22	NP_014222.2;	N1657	309	10	13	30	5	5	21	4	4	11	0	0	10	3	3	22	10	17	31	4	4	21	0	0	2
P39076	CCT2	NP_012124.1;		527	8	8	8	5	9	21	7	7	7	0	0	2	3	3	13	9	9	9	0	0	0	0	0	3
Q12149	RRP6	NP_014643.1;		733	6	12	22	7	7	21	6	6	6	0	0	0	5	5	5	8	8	8	6	6	6	0	0	5
Q12432	EAF3	NP_015348.1;	YP9367.03C	401	2	3	11	6	6	21	4	4	16	0	0	12	1	1	16	8	8	22	2	2	20	0	1	4
P40518	ARC15	NP_012202.1;		154	9	24	28	5	5	21	9	12	18	0	3	7	2	2	2	7	7	7	4	4	5	0	0	0
P32464	HYM1	NP_012732.1		399	10	20	32	7	7	21	5	5	5	0	0	1	2	5	7	7	7	7	10	10	20	3	6	9
P47117	ARP3	NP_012599.3;	J1760	449	7	7	17	6	6	21	7	7	7	0	0	8	4	19	34	6	6	16	10	25	41	0	1	3
P07703	RPC40	NP_015435.1;	P8283.18	335	8	23	31	4	13	21	7	7	7	0	1	1	5	17	17	6	6	6	4	8	8	0	1	4
Q06162	NKP2	NP_013419.1;		153	7	7	7	8	8	21	6	6	6	0	0	0	3	3	3	6	6	6	5	5	5	0	1	1
P47168	TTI2	NP_012670.3;	J2124	421	7	16	27	10	21	21	6	6	6	0	0	0	4	4	4	6	6	6	3	3	3	0	0	2
P53255	DRN1	NP_011607.3		507	7	16	24	5	18	21	7	7	7	0	0	0	2	2	4	4	4	4	2	2	2	1	4	5
P38164	SEA4	NP_009446.2;	YBL0808 YBL103C-A	1038	10	20	40	5	5	21	4	4	9	0	0	14	2	2	2	4	4	4	3	3	7	2	2	5
P81451	ATP19	NP_014564.1;	YOL078BW	68	2	2	20	5	5	21	2	2	3	0	0	7	2	2	9	4	4	4	10	11	11	1	1	6
P05319	RPP2A	NP_014603.1		106	1	11	21	3	3	21	0	0	0	0	0	0	0	0	0	0	0	0	0	0	0	1	3	5
P38633	SOH1	NP_011388.1;	G2864	127	10	19	19	10	20	20	10	19	19	10	17	17	7	16	16	10	21	21	10	20	20	0	0	1
Q05471	SWR1	NP_010621.1	D9651.6	1514	10	22	22	10	19	20	10	13	13	10	15	15	4	4	7	10	21	21	10	20	20	2	5	5
P05740	RPL17A	NP_012741.1;		184	10	21	21	10	20	20	10	10	10	9	9	9	6	10	10	10	20	20	10	19	19	0	1	4
P46990	RPL17B	NP_012358.1;	J0493	184	10	21	21	10	20	20	10	10	10	9	9	9	6	10	10	10	20	20	10	19	19	0	1	4
P38170	BRN1	NP_009455.3;	YBL0830	754	10	21	21	10	19	20	10	10	10	7	7	7	5	5	5	9	9	9	10	11	13	0	0	2
P07273	DST1	NP_011472.1		309	4	16	37	8	18	20	7	7	7	5	7	9	2	2	2	5	5	5	3	3	3	2	4	7
P36160	RPF2	NP_013007.1	YKR401	344	10	18	30	10	20	20	9	10	10	4	4	4	3	3	3	10	10	10	9	9	9	2	5	7
P05150	ARG3	NP_012447.1;	J0924	338	10	19	30	10	18	20	8	8	8	2	2	2	9	9	9	10	12	12	10	12	12	0	1	4
Q02767	VPS28	NP_015260.1;	LPE5W	242	9	15	22	10	14	20	8	8	8	1	1	1	2	2	2	8	8	8	10	13	13	2	2	4
P35178	RRP1	NP_010372.3	D4478	278	8	17	31	10	20	20	10	10	10	0	0	0	3	3	3	10	15	15	10	14	14	1	3	9
P29496	MCM5	NP_013376.1;	L9328.1	775	10	23	23	7	19	20	10	23	23	0	7	7	5	19	19	10	25	25	9	18	18	0	0	2
P36526	MRPL27	NP_009841.1	YBR2019	146	10	24	44	10	11	20	8	8	14	0	0	7	6	6	7	10	15	15	10	14	14	2	4	8
P22353	MRPL8	NP_012472.1	HRD238 J1125	238	9	14	28	10	15	20	8	8	8	0	0	0	4	4	4	10	18	18	7	7	7	1	3	5
P00424	COX5A	NP_014346.1;	N2474 YNL2474W	153	10	19	19	6	6	20	7	7	15	0	0	5	5	5	5	10	10	10	4	4	10	0	0	0
P21304	PWP1	NP_013297.1;	L8167.10	576	10	18	21	4	4	20	6	6	16	0	8	32	4	5	5	10	14	31	10	13	27	0	1	2
P47075	VTC4	NP_012522.2	J1345	721	8	9	9	7	7	20	4	4	4	0	0	1	4	4	4	10	10	10	9	9	9	2	3	4
P53070	MTO1	NP_011278.2;		669	10	20	30	10	13	20	4	4	4	0	0	0	5	5	5	10	10	10	0	0	0	0	0	1
P35180	TOM20	NP_011596.1;		183	8	8	14	6	6	20	5	5	10	0	0	11	6	6	6	9	9	9	7	7	14	0	0	2
P20437	CLN1	NP_013926.1;	YM9646.13	546	9	17	21	7	7	20	7	7	9	0	0	0	4	4	4	7	7	7	9	9	12	1	2	2
P00812	CAR1	NP_015214.1;	LPH15W	333	9	10	10	7	7	20	7	7	7	0	0	0	4	7	15	7	7	7	5	7	9	1	1	5
P15992	HSP26	NP_009628.1;	YBR0714	214	7	7	28	5	5	20	4	4	19	0	0	16	5	5	15	6	6	23	5	5	28	0	0	2
P25303	SCJ1	NP_013941.2;	YM8261.08	377	2	2	10	3	3	20	0	0	0	0	0	9	1	1	1	6	6	6	0	0	2	1	1	6
P38689	PRS3	NP_011852.1;		320	10	13	36	5	5	20	7	7	7	0	0	0	4	4	8	5	5	5	5	5	16	1	2	4
Q03081	MET31	NP_015287.1;	P7102.12	177	6	9	19	5	5	20	4	4	4	0	0	4	4	4	4	5	5	5	10	10	19	1	2	2
P36159	TRZ1	NP_013005.1;		838	9	17	28	4	9	20	8	8	8	0	0	0	5	9	9	4	4	4	10	13	13	0	1	5
P33298	RPT3	NP_010682.3	D9509.14	428	9	16	26	6	15	20	7	7	7	0	0	0	3	3	9	4	4	4	4	4	4	0	3	4
P53207	SNU71	NP_011527.1;		620	8	22	22	3	12	20	4	4	4	0	0	0	3	7	7	4	4	7	4	14	14	0	2	4
P07252	CBP1	NP_012326.1;	HRA654 J0242	654	10	25	40	7	9	20	4	4	6	0	0	1	1	1	1	4	4	4	1	1	7	0	1	3
P53867	ATG4	NP_014176.2;	N1274	494	5	9	15	2	8	20	3	3	10	0	0	2	0	0	0	4	4	10	0	5	13	1	2	2
P38287	CSH1	NP_009719.3	YBR1212	376	1	1	3	5	5	20	0	0	5	0	0	1	0	0	12	4	4	4	3	3	21	3	3	4
P53685	HST1	NP_014573.1;		503	3	3	23	3	3	20	0	0	6	0	0	10	1	1	1	0	0	11	0	0	17	0	0	4
Q08199	SIL1	NP_014611.1;		421	3	5	14	0	2	20	0	0	0	0	0	0	3	3	6	0	0	0	0	0	0	0	1	2
P53261	NOP7	NP_011617.1		605	10	23	36	10	13	19	10	14	17	10	16	20	4	4	9	10	15	22	10	12	22	3	4	8
Q12164	POM33	NP_013077.1;	L1201	279	10	16	20	10	19	19	10	17	17	10	13	13	7	14	14	10	20	20	10	19	19	0	1	2
P25344	STE50	NP_009898.1;	YCL32W	346	7	16	16	10	19	19	10	20	20	10	16	16	3	16	16	10	18	18	10	22	22	1	1	1
P17890	RPC31	NP_014248.3;	N1769	251	10	15	25	10	19	19	9	9	9	8	8	9	7	22	44	10	19	19	10	25	50	0	0	2
Q07657	SHS1	NP_010056.1		551	10	21	25	10	19	19	10	14	14	5	7	7	8	8	18	10	15	15	9	9	14	0	3	5
Q12041	MET32	NP_010539.1;	YD9320A.03C	191	4	15	21	6	6	19	7	7	9	4	4	19	2	2	2	7	7	17	6	6	16	1	1	4
P53335	PXR1	NP_011796.1;		271	9	24	24	9	13	19	10	15	15	3	12	15	3	14	28	10	13	13	10	18	18	1	1	3
P05749	RPL22A	NP_013162.1	L2168	121	10	25	26	10	18	19	9	9	9	3	4	4	4	10	13	10	11	11	10	15	15	2	3	5
Q05029	BCH1	NP_013964.1;	YM9959.19	724	10	10	16	8	8	19	7	7	8	3	3	3	4	4	17	10	10	19	10	12	30	1	1	2
P24279	MCM3	NP_010882.1;	SYGP-ORF23	971	10	23	35	10	11	19	9	9	9	2	2	4	8	12	12	10	13	30	10	12	13	0	0	0
P25302	SWI4	NP_011036.1;		1093	3	10	25	10	19	19	9	12	12	2	5	5	4	9	9	10	17	17	10	18	18	1	2	2
P17555	SRV2	NP_014261.1	N1210 N1838	526	10	11	29	7	7	19	6	6	14	1	1	11	6	6	13	10	14	39	9	9	26	1	3	6
P22276	RET1	NP_014850.1		1149	10	25	26	10	19	19	10	11	11	0	0	0	3	3	3	10	12	12	9	9	9	2	5	9
Q12083	MLH3	NP_015161.1;	P2550	715	9	16	16	10	19	19	9	9	9	0	0	0	4	4	4	10	18	18	10	12	12	1	2	2
Q12447	PAA1	NP_010356.1;		191	10	11	11	8	8	19	7	7	7	0	0	0	6	6	10	10	10	10	10	11	20	0	1	1
P40395	RIC1	NP_013140.1		1056	10	23	42	10	19	19	6	6	6	0	0	0	4	4	11	10	10	10	10	10	15	2	7	10
P48234	ENP2	NP_011661.2;	G6623	707	10	25	37	10	12	19	6	6	6	0	0	0	6	6	6	10	25	27	10	16	16	1	1	5
P0CS90	SSC1	NP_012579.1;	J1639	654	9	17	32	10	19	19	6	6	6	0	0	0	2	2	2	10	14	14	10	13	13	1	1	3
Q08951	APL5	NP_015129.1;		932	10	18	26	6	6	19	6	6	6	0	0	0	4	4	4	10	12	12	9	9	9	0	1	5
P33315	TKL2	NP_009675.3;	YBR0912	681	10	10	10	6	10	19	5	5	5	0	0	1	3	3	14	10	15	24	7	11	24	1	1	2
P38825	TOM71	NP_011985.1;		639	4	4	7	5	5	19	4	4	10	0	0	11	2	2	2	10	19	44	5	5	16	0	2	5
P04050	RPO21	NP_010141.1;	D2150	1733	10	25	46	8	8	19	7	7	12	0	0	3	5	5	6	9	9	9	10	12	18	0	1	3
P25380	SPS22	NP_009882.1;	YCL48W	463	7	7	14	4	4	19	3	3	10	0	0	7	3	3	17	8	9	18	5	5	21	1	1	2
P00331	ADH2	NP_014032.1	YM9952.05C	348	5	17	19	6	13	19	8	11	11	0	3	3	3	9	18	7	7	7	6	6	11	1	3	6
P53271	COG2	NP_011635.2;	G6324	262	10	16	29	7	7	19	6	6	6	0	0	2	6	6	11	7	7	7	8	8	21	0	1	2
P20967	KGD1	NP_012141.1;		1014	9	24	44	9	19	19	6	6	6	0	0	0	3	3	10	6	6	6	5	5	5	0	2	3
P16862	PFK2	NP_013932.1;	YM8325.06C	959	10	13	23	6	6	19	4	4	4	0	0	4	7	7	18	6	6	16	7	7	19	0	1	2
P53218	POP6	NP_011544.1;		158	5	12	29	4	4	19	4	4	4	0	0	1	3	3	18	5	5	5	3	3	10	0	0	2
P28005	POP5	NP_009369.1;	FUN53	173	8	20	30	4	9	19	1	1	1	0	0	0	1	1	1	5	5	5	3	3	7	1	1	3
Q12449	AHA1	NP_010500.3	YD8142.16 YD8142B.06	350	10	11	30	6	6	19	7	7	7	0	0	0	5	6	6	4	4	4	7	7	7	0	3	9
Q08963	LEA1	NP_015111.1;		238	10	19	31	5	5	19	4	4	7	0	0	5	5	5	9	4	4	4	5	5	19	1	2	4
P38687	SRP68	NP_015081.1;		599	6	13	29	4	4	19	4	4	4	0	0	0	4	4	4	4	4	4	4	4	4	0	0	6
Q06106	MRD1	NP_015437.1;		887	10	18	43	3	6	19	4	6	16	0	3	20	4	4	13	4	4	4	0	0	14	1	2	4
P13134	KEX2	NP_014161.1;	N1122	814	4	5	16	3	5	19	1	1	1	0	0	0	1	1	1	4	4	4	3	3	3	2	2	3
P39719	FLC2	NP_009348.2;		783	3	7	16	0	4	19	0	0	0	0	0	3	2	7	15	4	11	25	0	6	18	0	0	1
P21801	SDH2	NP_013059.1		266	5	14	26	3	8	19	3	3	3	0	0	0	1	1	10	3	3	3	1	3	8	1	3	6
Q05900	YHC1	NP_013401.1;	L8003.21	231	3	17	41	3	8	19	2	2	9	0	0	7	1	1	1	3	3	5	2	2	5	0	1	4
P27999	RPB9	NP_011445.1;		122	10	24	30	9	19	19	2	2	2	0	0	0	3	3	3	3	3	3	0	0	0	0	1	1
P40571	RPR2	NP_012280.1		144	10	22	22	10	17	18	10	25	27	10	23	25	3	18	20	10	13	13	10	25	26	4	4	4
P38112	MAK5	NP_009700.1	YBR1119	773	10	25	37	10	18	18	10	17	17	10	19	19	4	4	18	10	18	20	10	16	16	4	6	7
Q06333	CNL1	NP_010644.1;		122	10	22	22	10	18	18	10	15	15	10	14	14	5	16	16	10	22	22	10	22	22	0	1	3
P38692	KIC1	NP_011970.1		1080	10	23	43	10	18	18	10	13	13	10	10	10	5	5	5	10	17	17	10	20	20	2	3	6
Q06213	NUT2	NP_015494.1;	P9325.2	157	6	6	6	10	18	18	10	15	16	10	17	22	7	7	17	10	19	19	10	14	15	0	0	1
P53128	MET13	NP_011390.2	G2882	600	10	25	27	10	18	18	10	12	12	9	9	9	1	1	1	10	17	17	10	17	17	2	3	4
P07259	URA2	NP_012405.2;	J0686	2214	10	18	18	10	18	18	10	18	18	8	15	15	4	10	10	10	19	19	10	16	16	0	0	2
P38629	RFC3	NP_014109.1	N0533	340	10	25	38	10	18	18	9	9	9	7	12	12	5	5	9	10	13	13	10	14	14	2	3	5
P47045	TIM54	NP_012481.3	J1150	478	10	22	23	10	18	18	10	13	13	6	7	7	5	16	16	10	20	20	10	19	19	2	4	4
P38738	OCA5	NP_011834.1		679	10	11	11	10	18	18	10	16	16	4	5	5	5	5	5	10	10	10	10	13	13	2	5	6
P03965	CPA2	NP_012643.3;	J2002	1118	9	21	21	10	17	18	10	10	10	4	10	10	7	12	20	10	21	21	10	21	21	0	1	1
Q04947	RTN1	NP_010519.3;		295	8	8	8	10	18	18	10	11	11	4	4	4	3	3	3	10	20	20	10	19	19	0	1	4
Q05040	FAR8	NP_013742.1;	YM9973.02C	523	9	16	17	6	6	18	7	7	8	4	7	18	3	3	3	10	25	39	10	10	10	0	0	2
Q06205	FPR4	NP_013554.3;	L9324.3	392	6	20	33	6	6	18	4	4	8	4	9	24	4	13	23	9	9	24	10	22	36	0	1	3
P06243	CDC7	NP_010267.3	D2855	507	10	14	18	10	18	18	10	11	11	3	3	3	7	7	7	10	10	10	10	12	12	2	3	7
P05756	RPS13	NP_010349.3;	D4252 YD9609.18	151	10	20	27	10	18	18	8	8	8	1	1	1	5	12	12	10	14	14	10	23	23	1	1	4
P23724	PRE7	NP_009512.1;	YBL0407	241	6	12	12	10	18	18	10	18	18	0	6	6	5	16	23	10	19	19	10	25	28	0	0	0
P47134	BIR1	NP_012622.3	J1880	954	10	25	35	10	18	18	9	9	9	0	0	0	3	3	3	10	10	10	10	10	10	2	3	9
P14682	CDC34	NP_010339.1	D4211 YD9609.08C	295	10	16	27	10	18	18	9	9	9	0	0	0	7	7	7	10	13	13	10	23	23	1	3	3
P40094	COG3	NP_011084.1;		801	9	24	32	10	10	18	9	9	9	0	3	3	3	3	3	10	10	10	10	11	16	1	1	4
P33754	SEC66	NP_009730.3;	YBR1232	206	10	25	31	10	18	18	8	8	8	0	0	0	5	5	5	10	11	11	10	20	20	1	2	2
P22336	RFA1	NP_009404.1;	FUN3	621	8	21	33	8	8	18	8	10	17	0	0	7	6	15	32	10	24	25	10	25	36	0	1	3
P54838	DAK1	NP_013641.1;		584	10	25	32	10	13	18	7	7	11	0	0	3	5	7	14	10	12	12	10	15	19	1	2	5
P25043	PUP1	NP_014800.3;		261	6	17	31	6	16	18	7	14	15	0	9	12	4	10	12	10	24	24	10	17	23	0	1	2
P46972	IMP2	NP_013749.1;	YM9973.09	177	10	11	20	8	8	18	5	5	5	0	0	1	3	3	9	10	11	11	8	8	20	1	1	2
P15424	MSS116	NP_010480.1;	YD9346.05C	664	9	12	26	4	4	18	4	4	12	0	0	9	3	3	14	10	12	34	1	1	15	1	1	1
P56628	RPL22B	NP_116619.1	YFL034BC	122	10	25	26	10	16	18	9	9	9	0	0	0	4	9	14	9	9	9	7	9	9	2	3	5
P0CX51	RPS16A	NP_010200.1;NP_013863.2	YM9375.12	143	10	21	39	10	18	18	8	8	8	0	0	0	4	4	4	9	9	9	8	11	11	0	5	7
P0CX52	RPS16B	NP_010200.1;NP_013863.2		143	10	21	39	10	18	18	8	8	8	0	0	0	4	4	4	9	9	9	8	11	11	0	5	7
P53323	BUD32	NP_011778.1;		261	3	13	29	6	6	18	7	7	10	0	0	0	4	4	5	9	9	9	4	4	16	1	1	3
P27929	NAM9	NP_014262.3	N1211 N1840	486	10	25	42	10	11	18	9	9	9	0	0	0	4	4	4	8	8	8	3	3	3	2	3	9
Q04213	IOC4	NP_013758.1;	YM9532.09	475	9	9	29	5	5	18	4	4	10	0	0	5	5	5	14	8	8	24	9	9	32	0	2	6
P39998	EDC3	NP_010901.1		551	6	16	32	4	4	18	3	3	3	0	0	1	3	3	13	8	8	22	5	5	9	0	4	7
P32598	GLC7	NP_011059.3;		312	8	22	29	8	15	18	8	8	8	0	0	0	7	7	7	7	7	7	6	6	6	0	1	3
Q99278	MED11	NP_013830.1;	YM9718.11C	115	4	4	10	8	8	18	8	8	8	0	0	0	2	2	2	7	7	7	2	2	6	2	2	3
P15891	ABP1	NP_010012.1;	YCR88W	592	10	21	32	7	7	18	7	7	9	0	0	5	5	5	17	7	7	7	10	10	16	0	1	3
P40469	MET18	NP_012138.1;		1032	5	15	28	7	13	18	7	7	7	0	0	0	5	5	5	7	7	7	5	5	5	0	1	3
Q02931	NAN1	NP_015199.1;		896	10	21	26	7	15	18	5	5	5	0	0	0	3	12	14	7	7	7	6	6	6	1	2	3
P00427	COX6	NP_011918.1;		148	10	25	47	4	4	18	5	5	5	0	0	0	4	4	4	7	7	7	4	4	6	0	0	2
Q07794	RTT109	NP_013099.1;	L1377	436	7	10	27	6	6	18	3	3	4	0	0	0	5	5	11	7	7	7	3	3	6	0	0	4
P38089	PTC4	NP_009683.1;	YBR0921	393	10	19	22	7	18	18	9	9	9	0	2	2	5	5	5	6	6	6	9	13	14	0	2	2
P20081	FPR1	NP_014264.1;	N1213 N1845	114	7	21	21	7	7	18	9	9	9	0	1	3	3	17	29	6	6	6	7	11	11	1	2	3
Q03981	CSN9	NP_010464.1		162	10	17	25	10	15	18	7	7	7	0	0	0	3	3	3	6	6	6	10	14	14	1	3	5
P53875	MRPL19	NP_014214.1;	N1623	158	3	15	18	7	14	18	4	4	4	0	2	2	2	10	18	6	6	6	6	17	25	2	2	5
P04037	COX4	NP_011328.1;	G1362	155	9	22	41	7	7	18	4	4	11	0	0	9	2	2	11	6	6	6	4	4	12	0	1	3
P32335	MSS51	NP_013304.1;	L8167.17	436	7	7	14	4	4	18	4	4	17	0	0	14	4	4	13	6	6	15	0	0	8	0	1	1
P53846	LTO1	NP_014139.1	N0838	162	8	23	28	10	18	18	7	7	7	0	0	0	1	1	1	5	5	5	0	0	0	2	6	9
P15625	FRS2	NP_116631.1		503	2	5	14	6	14	18	5	5	5	0	0	0	2	2	2	5	5	5	0	0	0	2	3	6
P47822	SRB7	NP_010594.3;	D9740.17	140	6	6	15	5	5	18	3	3	14	0	0	14	3	3	3	5	5	5	4	4	12	0	0	2
P47039	BNA3	NP_012475.3	J1138	444	9	20	31	5	9	18	8	8	9	0	0	0	2	2	2	4	4	4	1	1	6	1	3	6
P06242	KIN28	NP_010175.1	D2330	306	9	15	36	10	13	18	7	7	7	0	0	0	2	2	2	4	4	4	10	13	13	3	4	8
P42847	MRPS18	NP_014093.1;	N0397	217	10	25	50	1	1	18	5	5	6	0	0	0	2	5	21	4	4	16	5	7	11	1	1	2
P24000	RPL24B	NP_011664.3;	G6635	155	10	25	47	5	5	18	4	4	4	0	0	8	5	13	13	4	4	4	10	10	10	1	2	6
P04449	RPL24A	NP_011484.1;		155	10	25	46	5	5	18	4	4	4	0	0	8	5	12	12	4	4	4	8	8	9	1	2	6
O14464	RTC6	NP_015141.1;	YPL183BW	93	7	12	19	9	18	18	4	4	4	0	0	0	2	2	2	4	4	4	0	0	0	0	1	1
Q06071	BLS1	NP_013512.1;		122	6	9	21	1	3	18	1	1	4	0	0	5	4	4	4	4	4	4	0	0	0	0	1	3
P32341	VPH2	NP_012803.1	YKL520	215	8	17	19	7	16	18	4	4	4	0	0	0	2	2	2	3	3	3	0	0	0	1	4	6
Q02725	VTC3	NP_015306.1		835	7	14	30	1	1	18	2	2	2	0	0	0	4	4	7	2	2	3	0	0	13	1	3	5
P22216	RAD53	NP_015172.1;	P2588	821	10	14	27	10	17	17	10	10	10	8	8	8	4	4	4	10	16	16	10	15	15	0	1	1
P39552	MST28	NP_009419.1;	FUN59	234	10	25	31	10	17	17	10	13	13	5	5	5	6	8	8	10	10	10	7	7	7	1	2	3
Q12527	ATG11	NP_015374.1;	YP9499.07c	1178	10	20	20	10	17	17	10	15	15	3	4	4	4	4	4	10	16	16	10	15	15	0	0	2
P32608	RTG2	NP_011262.1;	NRF588	588	10	21	22	10	12	17	9	9	9	3	3	3	7	7	7	10	13	13	10	12	12	0	0	2
P0CX83	RPL19B	NP_009526.1;NP_009641.1	YBL0424	189	10	25	47	7	7	17	7	7	7	3	3	9	2	2	2	9	9	9	5	5	5	1	3	5
P0CX82	RPL19A	NP_009526.1;NP_009641.1	YBR084BC	189	10	25	47	7	7	17	7	7	7	3	3	9	2	2	2	9	9	9	5	5	5	1	3	5
Q08685	CLP1	NP_014893.1;		445	10	22	22	10	17	17	10	15	15	2	3	3	4	4	4	10	20	20	10	16	16	0	1	5
P39077	CCT3	NP_012520.1;	J1336	534	4	18	18	7	17	17	10	10	10	2	4	4	2	2	2	4	4	4	8	8	8	0	0	3
Q04867		NP_014041.1	YM9924.02C	317	10	24	24	10	17	17	10	10	10	0	0	0	3	3	3	10	13	13	10	15	15	3	4	6
P39966	PTC2	NP_011013.1;		464	10	18	18	5	14	17	10	10	10	0	0	1	4	10	10	10	18	18	10	20	25	0	1	2
Q04177	UTP5	NP_010686.1;	D9509.17	643	10	14	33	8	8	17	8	8	8	0	0	0	4	4	4	10	12	12	8	8	17	0	1	1
Q04949	DYN3	NP_014028.2;	YM9952.01C	312	5	10	10	7	17	17	8	8	8	0	0	0	4	4	4	10	16	16	1	1	1	1	1	2
P07560	SEC4	NP_116650.1;		215	10	17	26	10	17	17	7	7	7	0	0	0	6	11	11	10	16	16	10	20	20	0	2	4
P07149	FAS1	NP_012739.1;		2051	10	15	15	10	12	17	6	6	13	0	0	6	6	6	12	10	11	11	10	12	21	0	0	1
P51998	YML6	NP_013687.1;		286	10	13	24	5	9	17	6	6	6	0	6	14	4	4	12	10	16	16	2	2	15	2	2	3
Q04372	TAP42	NP_013741.1;	YM9711.18 YM9973.01C	366	5	14	15	5	12	17	5	5	5	0	0	0	5	5	5	10	13	13	6	11	14	0	1	4
Q12220	DIP2	NP_013230.1;	L3116 L9233.1	943	4	4	9	5	5	17	4	4	4	0	0	2	1	2	18	10	25	36	1	1	17	1	1	1
P39515	TIM17	NP_012392.1;	J0648	158	10	10	10	7	7	17	6	6	6	0	0	0	5	8	22	9	9	9	10	10	19	0	0	1
P46655	GUS1	NP_011269.2;	G0583 HRB724	708	10	10	22	6	6	17	4	4	4	0	0	0	6	6	6	9	9	9	4	4	4	1	1	5
P41811	SEC27	NP_011378.1	G2827	889	10	25	29	10	17	17	7	7	7	0	0	0	4	8	8	8	8	8	10	22	22	3	4	4
P08525	QCR8	NP_012369.1	J0526	94	10	11	11	10	17	17	7	7	7	0	0	0	6	20	20	8	8	8	10	23	23	1	3	4
P53617	NRD1	NP_014148.1;	N0868	575	6	17	31	7	14	17	7	7	7	0	0	0	4	4	4	7	7	7	7	7	7	0	2	5
P53290	GTR2	NP_011679.3;		341	9	9	9	8	8	17	5	5	5	0	0	0	4	4	4	7	7	7	7	7	7	1	2	3
P05317	RPP0	NP_013444.1	L8300.8	312	8	8	25	8	8	17	5	5	5	0	0	0	2	2	2	7	7	7	7	7	7	2	4	5
P32527	ZUO1	NP_011801.1;		433	10	25	38	6	17	17	5	5	5	0	2	2	7	7	7	7	7	7	6	6	6	0	1	2
Q12118	SGT2	NP_014649.1	UNF346	346	4	4	6	7	12	17	5	5	5	0	0	0	2	2	2	7	7	7	5	5	5	1	3	3
P23254	TKL1	NP_015399.1;	YP9499.29C	680	10	12	17	5	6	17	5	5	6	0	0	4	4	5	18	7	7	7	3	4	19	1	2	2
P53622	COP1	NP_010136.1	D1578	1201	8	22	22	10	16	17	7	7	7	0	0	0	2	2	2	6	6	6	10	20	20	3	4	4
P14906	SEC63	NP_014897.1;		663	7	10	18	10	10	17	7	7	7	0	0	0	4	4	12	6	6	6	10	11	21	0	0	1
P40496	RSM25	NP_012173.3		264	10	13	30	5	5	17	6	6	13	0	0	8	3	3	14	6	6	18	3	3	3	1	3	5
P14741	GCN3	NP_012951.1;		305	6	13	13	5	5	17	4	4	4	0	0	0	4	4	4	6	6	6	4	4	4	0	0	2
Q12019	MDN1	NP_013207.1;	L2901 L8004.13	4910	7	8	11	5	5	17	3	3	3	0	0	0	3	3	5	5	5	15	4	4	4	0	0	1
P38270	ATG14	NP_009686.1;	YBR1003	344	5	5	11	5	5	17	0	0	0	0	0	0	1	1	1	5	5	5	0	0	0	0	0	5
P49095	GCV2	NP_013914.1;	YM9646.01	1034	8	23	44	6	15	17	5	5	5	0	0	0	2	2	2	4	4	4	3	3	3	0	0	1
P0C2H7	RPL27B	NP_010759.1	D8035.14	136	10	21	36	5	5	17	3	3	7	0	1	5	1	1	11	4	4	4	0	0	8	3	5	7
P27680	COQ3	NP_014545.2;	HRF316	312	10	25	39	4	4	17	2	2	2	0	0	0	1	1	1	4	4	4	0	0	9	1	2	4
P50106	RPA14	NP_010440.1;	YD8358.11	137	10	20	26	10	14	16	10	16	16	10	25	27	6	9	9	10	14	14	10	18	18	1	1	2
Q04603	DPB4	NP_010406.3		196	10	24	31	10	12	16	10	11	11	10	14	14	4	8	8	10	18	18	10	12	12	2	3	5
P25299	RNA15	NP_011471.1;		296	9	17	17	10	16	16	10	12	12	10	15	16	6	17	17	10	16	16	10	17	17	0	0	1
Q12242	RUP1	NP_014781.1;	YOR3332c	671	2	2	4	7	7	16	7	7	13	8	21	38	3	3	5	6	6	13	10	15	24	1	1	1
Q03768	GIR2	NP_010436.3;	YD8358.08	265	7	19	30	10	13	16	7	7	7	7	9	9	1	1	1	9	9	9	8	8	14	2	2	5
P06786	TOP2	NP_014311.3	N2244	1428	10	24	30	10	16	16	9	9	9	6	6	6	7	7	7	10	12	12	10	11	11	1	3	3
P34223	SHP1	NP_009495.1;	YBL0509 YBL0515	423	5	5	10	7	7	16	6	6	13	6	8	22	3	3	3	10	11	35	5	5	15	0	0	1
Q99177	BRR1	NP_015382.1;	YP9499.13	341	10	25	31	10	15	16	10	10	10	5	5	5	5	5	5	10	19	19	10	25	26	1	1	3
P25582	SPB1	NP_009877.1	YCL431 YCL54W	841	10	20	25	10	16	16	9	9	9	5	5	5	4	4	4	10	13	13	10	13	13	4	6	10
P48363	PAC10	NP_011592.3;		199	8	20	20	10	12	16	10	10	10	4	5	5	5	5	5	10	15	15	10	16	16	1	1	5
P38911	FPR3	NP_013637.1;		411	5	18	31	5	5	16	4	4	4	4	18	41	4	4	4	8	8	22	7	13	25	0	0	1
P39682	PRP39	NP_013667.1;	YM9827.06	629	10	18	18	10	16	16	10	17	17	3	3	3	5	5	5	10	23	23	8	8	8	0	0	0
Q12018	CDC53	NP_010150.1;	D2190	815	10	16	26	7	7	16	8	8	9	2	2	2	7	7	7	10	13	16	10	10	13	0	0	3
P32589	SSE1	NP_015219.1;	LPG3C	693	10	12	35	6	6	16	6	6	7	2	2	10	7	8	24	7	7	7	10	12	17	0	0	1
P22515	UBA1	NP_012712.1;		1024	10	18	18	10	16	16	8	8	8	1	1	1	7	7	7	10	17	17	10	17	17	0	0	3
P38879	EGD2	NP_012063.3		174	10	19	44	7	16	16	7	7	7	1	3	3	4	4	4	10	10	10	5	5	5	0	4	7
P34909	MOT2	NP_010991.3;		587	3	3	3	9	12	16	8	8	8	1	1	1	3	3	12	8	8	8	6	14	30	0	0	1
P31539	HSP104	NP_013074.1;	L0948	908	6	6	6	7	12	16	7	7	7	1	1	1	4	4	4	8	14	16	5	8	10	0	1	1
P46985	MNN11	NP_012352.2	J0425	422	10	24	24	10	16	16	10	11	11	0	0	0	3	7	7	10	18	18	10	16	16	3	3	6
P32911	SUI1	NP_014155.1;	N0905	108	10	20	42	7	16	16	9	10	10	0	3	9	5	14	14	10	20	20	10	23	23	1	1	2
P36149	BET3	NP_012994.1		193	10	20	20	10	16	16	8	8	8	0	0	0	5	5	5	10	10	10	10	21	21	1	4	5
P47123	MOG1	NP_012608.1;	J1827	218	10	15	15	9	9	16	8	8	8	0	2	10	3	8	18	10	10	10	10	15	22	2	2	3
P39692	MET10	NP_116686.3;		1035	8	20	26	7	16	16	8	8	8	0	0	0	4	17	17	10	16	16	10	11	11	0	2	3
Q08742	RDL2	NP_014929.3;		149	10	25	50	10	12	16	7	7	7	0	0	0	5	5	5	10	12	12	10	16	16	1	1	5
P38130	KTR3	NP_009764.3	YBR1445	404	10	13	16	10	11	16	7	7	7	0	0	0	1	1	6	10	10	10	10	11	19	3	6	6
P53011	SEH1	NP_011415.1;		349	10	10	22	9	9	16	7	7	7	0	0	0	7	7	7	10	10	10	10	11	11	0	0	3
P53840	TOF1	NP_014126.1;	N0636	1238	9	12	26	9	9	16	7	7	7	0	0	0	6	6	24	10	20	38	10	14	32	0	0	1
P07276	RAD2	NP_011774.1;		1031	10	23	27	3	10	16	7	7	7	0	0	0	3	3	3	10	12	12	10	13	19	0	1	3
P14120	RPL30	NP_011485.1		105	10	18	34	10	11	16	7	7	7	0	0	0	3	3	3	10	10	10	9	9	9	1	4	8
P32458	CDC11	NP_012610.1	J1833	415	10	25	36	10	16	16	7	7	7	0	0	0	5	5	10	10	16	16	4	4	4	0	3	3
P07250	ARG82	NP_010458.3;	YD9395.06C	355	3	16	21	6	14	16	7	7	7	0	1	1	4	14	16	10	22	22	4	4	5	0	1	3
Q12379	SWM1	NP_010546.1;	YD9320A.11 YD9320A.11c	170	7	7	10	10	10	16	5	5	11	0	0	13	6	6	6	10	25	37	10	17	26	0	0	1
P32288	GLN1	NP_015360.2;	YP3085.01 YP9367.15	370	7	7	25	8	8	16	5	5	5	0	0	0	2	2	5	10	10	10	6	6	6	1	2	5
P53176	MST27	NP_011464.1;		234	10	25	31	10	16	16	10	11	11	0	0	0	5	5	5	9	9	9	7	7	7	1	2	3
P20486	CKS1	NP_009693.3;	YBR1011	150	10	19	32	5	8	16	8	8	8	0	0	0	2	2	6	9	9	9	10	14	17	0	1	2
P25623	SYP1	NP_009959.2;	YCR30C/YCR29C	870	10	23	27	10	16	16	9	9	9	0	0	0	4	4	4	8	8	8	9	9	9	1	2	6
P40492	FYV10	NP_012169.1;		516	10	12	12	7	7	16	6	6	6	0	0	3	4	4	4	8	8	8	9	9	17	1	2	6
P16451	PDX1	NP_011709.1	G7579	410	10	13	15	8	8	16	4	4	4	0	0	0	5	5	10	8	8	8	8	8	20	1	3	6
P25569	GID7	NP_009891.1;	YCL311 YCL39W	745	5	20	22	6	16	16	9	9	9	0	1	1	3	11	11	7	10	10	7	7	14	1	1	5
P19736	PRP9	NP_010254.1;	D2773	530	6	7	19	10	12	16	6	6	6	0	0	0	3	3	3	7	7	7	3	3	3	0	0	2
P39567	IMD1		FUN63	403	8	22	22	6	16	16	6	6	6	0	0	0	2	10	10	7	7	7	3	3	3	1	1	3
P39735	SAW1	NP_009375.1;		261	10	17	37	5	5	16	5	5	5	0	0	0	3	3	3	7	7	12	3	3	11	1	2	4
P53192	GET1	NP_011495.1;		235	4	4	14	2	2	16	0	0	0	0	0	0	0	0	0	7	7	7	1	1	1	0	2	8
P53256	RRP46	NP_011609.2;		223	6	18	30	5	10	16	7	7	7	0	0	0	2	2	2	6	6	6	3	3	3	0	1	2
P39940	RSP5	NP_011051.3;	SYGP-ORF41	809	4	15	32	7	7	16	5	5	5	0	0	0	4	4	4	6	6	6	3	3	3	1	2	5
P40003	VAB2	NP_010911.3		282	7	17	18	4	4	16	3	3	3	0	0	0	3	3	3	6	6	6	7	7	7	2	3	6
P38310	FTH1	NP_009766.4;	YBR1446	465	6	6	10	4	4	16	0	0	6	0	0	7	2	2	13	6	6	26	5	5	23	0	0	1
Q12232	SLP1	NP_014797.1;	O3545	587	2	2	20	3	3	16	0	0	7	0	0	21	2	2	4	6	6	21	3	4	29	0	1	3
Q08285	RRP40	NP_014499.2;		240	10	16	28	7	11	16	9	10	10	0	1	1	7	22	30	5	5	5	10	16	16	0	1	3
Q12509	ARP6	NP_013186.1	L2393 L9449.13	438	10	25	32	6	16	16	7	7	7	0	0	0	6	19	19	5	5	5	4	4	4	0	3	7
P36152	DRE2	NP_012997.3;		348	10	20	34	4	9	16	6	6	6	0	1	1	3	3	3	5	5	5	6	6	6	1	2	6
P32492	MYO4	NP_009373.1	FUN22	1471	9	19	26	4	4	16	6	6	10	0	0	5	3	3	5	5	5	5	6	6	11	1	3	4
P0C0X0	RPS28B	NP_013366.1	L8479.5	67	6	18	43	7	8	16	6	6	6	0	0	2	5	5	5	5	5	5	5	5	5	2	3	4
P32908	SMC1	NP_116647.1;		1225	7	22	36	5	5	16	5	5	5	0	0	0	4	5	22	5	5	5	3	5	21	0	2	3
P31334	MRPL9	NP_011736.1;	G8520	269	8	9	22	6	6	16	3	3	3	0	0	1	3	3	3	5	5	5	6	6	6	1	2	2
P53741	BRE5	NP_014449.1;	N3465	515	4	4	16	3	3	16	2	2	7	0	0	0	3	3	6	5	5	9	5	5	16	0	1	3
P00950	GPM1	NP_012770.1;	YKL607	247	6	17	29	5	5	16	7	7	7	0	0	1	3	3	3	4	4	4	0	0	0	1	2	7
Q92316	OST5	NP_011288.1;	YGL226BC	86	3	10	10	10	16	16	6	6	6	0	0	0	1	1	1	4	4	4	0	0	0	1	2	4
P32558	SPT16	NP_011308.1		1035	10	12	14	5	7	16	3	3	3	0	0	0	3	3	7	4	4	4	4	4	8	0	3	4
P18409	MDM10	NP_009392.2;	FUN37	493	2	11	18	4	10	16	3	3	3	0	0	0	2	2	3	4	4	4	3	3	4	0	0	1
P38242	ALG14	NP_009626.1;	YBR0711	237	4	4	23	4	4	16	0	0	0	0	0	0	2	2	3	4	4	4	0	0	7	1	1	5
Q04087	LRS4	NP_010727.1;	D9461.25	347	3	9	14	4	4	16	2	2	2	0	0	3	5	5	14	3	3	3	0	0	15	0	2	6
Q03218	MMT1	NP_013902.1	YM8010.07	510	10	25	50	0	0	16	1	1	1	0	0	9	1	1	1	3	3	3	0	0	10	1	3	7
Q00381	APS2	NP_012592.1;	J1720	147	4	11	26	0	1	16	0	0	0	0	0	0	2	2	2	3	3	3	0	0	0	1	1	2
P20052	PHO80	NP_014642.1;	O2505 UNB293	293	10	25	30	10	15	15	10	13	13	10	11	11	5	5	5	10	22	22	10	20	20	0	1	2
P32468	CDC12	NP_011975.1;		407	9	21	21	10	15	15	8	8	8	10	19	19	5	15	15	10	21	21	10	17	17	0	1	2
Q03750	TAF8	NP_013593.1;	YM8339.05C	510	10	23	23	10	15	15	10	14	14	9	11	11	8	8	8	10	18	18	10	14	14	1	1	3
P53037	PSD2	NP_011686.1		1138	10	18	19	10	15	15	9	9	9	7	9	9	3	3	3	10	15	15	10	11	11	3	6	7
Q02457	TBF1	NP_015197.1;	LPI16C	562	10	15	15	10	15	15	9	9	9	5	5	5	6	7	7	10	14	14	10	11	11	0	0	0
P12904	SNF4	NP_011400.1		322	10	14	25	10	15	15	9	9	9	4	4	4	4	4	4	10	12	12	10	10	10	2	3	5
P38873	KOG1	NP_012056.1;	H9998.14	1557	10	13	14	8	11	15	9	9	10	3	6	8	4	7	13	8	8	11	7	7	14	1	1	3
P03962	URA3	NP_010893.3		267	10	17	17	10	15	15	10	10	10	2	2	2	2	2	2	10	14	14	10	13	13	2	3	5
P00420	COX3	NP_009328.1;YP_009144713.1;		269	9	17	17	10	15	15	8	8	8	1	1	1	2	4	4	10	15	15	10	19	19	0	0	0
Q6Q560	ISD11	NP_010968.1;		94	10	15	25	6	6	15	6	6	7	1	1	4	5	5	5	9	9	9	5	5	5	0	2	4
P32502	GCD7	NP_013394.1;	L8003.17	381	10	20	24	10	15	15	8	8	8	0	0	0	4	4	4	10	17	17	10	16	16	0	0	2
P40364	MPM1	NP_012469.3	HRE252 J1111	252	10	13	13	10	15	15	8	8	8	0	0	0	7	11	19	10	14	14	10	17	17	0	4	5
Q12262	MCM16	NP_015371.1;		181	7	7	7	10	15	15	8	8	8	0	0	0	4	4	4	10	13	13	7	7	7	1	2	3
Q07468	VAM6	NP_010206.1		1049	10	25	32	10	15	15	7	7	7	0	0	0	1	1	1	10	12	12	7	7	7	2	3	6
P33203	PRP40	NP_012913.3	YKL165	583	9	24	32	6	8	15	5	5	5	0	0	0	2	2	2	10	12	12	8	8	8	2	4	8
Q3E7Y3	RPS22B	NP_013471.1;	L8039.6	130	5	16	20	6	15	15	7	7	7	0	0	0	4	4	4	9	9	9	3	3	3	0	2	5
P38753	HSE1	NP_011861.1		452	5	17	17	7	7	15	5	5	5	0	0	5	5	5	5	9	9	9	5	5	6	1	3	4
P47173		NP_012676.3	J2171	342	10	21	32	10	15	15	6	6	6	0	0	0	3	3	3	8	8	8	9	9	9	3	3	5
P47142	VPS25	NP_012636.1;	J1957	202	10	25	25	7	15	15	6	6	6	0	0	0	4	10	10	8	12	12	7	7	7	0	0	3
P34110	VPS35	NP_012381.1;	J0580	944	8	8	14	6	6	15	6	6	6	0	0	0	4	4	4	8	8	8	7	7	11	0	1	2
P53961	GPI15	NP_014360.2	N2687	229	10	25	47	7	7	15	4	4	4	0	0	0	2	2	2	8	8	8	4	4	4	2	4	9
P0CX26	RPL43B	NP_012628.3;NP_015368.1	YJR094BW	92	10	23	38	10	12	15	8	8	8	0	0	0	2	2	2	7	7	7	8	8	8	3	4	9
P0CX25	RPL43A	NP_012628.3;NP_015368.1	YP9499.02	92	10	23	38	10	12	15	8	8	8	0	0	0	2	2	2	7	7	7	8	8	8	3	4	9
Q12074	SPE3	NP_015394.1;	YP9499.24C	293	10	18	18	5	5	15	8	8	8	0	0	0	3	3	3	7	7	7	8	8	8	0	0	5
P25343	RVS161	NP_009935.1	YCR9C	265	4	19	24	5	5	15	7	7	7	0	0	0	2	2	2	7	7	7	9	9	9	2	4	7
Q12321	MED1	NP_015395.1;	YP9499.25 YPR063W	566	5	9	10	7	7	15	7	7	7	0	0	0	5	5	5	7	7	7	5	5	5	0	2	2
P07280	RPS19A	NP_014520.1;		144	5	9	21	6	6	15	5	5	5	0	0	6	4	4	16	7	7	7	4	4	9	0	0	2
P07281	RPS19B	NP_014097.1;	N0422	144	5	9	21	6	6	15	4	4	4	0	0	5	3	3	15	7	7	7	4	4	8	0	0	2
P52867	PMT5	NP_010190.1	D2399	743	10	24	41	7	7	15	7	7	7	0	0	0	3	3	3	6	6	6	6	6	6	2	3	6
O13563	RPN13	NP_013525.3 [O13563-1];		156	6	20	40	6	6	15	5	5	7	0	0	0	4	4	4	6	6	6	7	7	7	1	1	2
P38555	YPT31	NP_010948.1;		223	8	8	25	6	6	15	4	4	4	0	0	0	5	6	9	6	6	6	8	8	8	0	2	4
P53507	TOM7	NP_014329.1;	N2378	60	10	13	20	7	15	15	4	4	4	0	0	0	5	5	10	6	6	6	6	6	6	0	2	2
Q04675	SEN15	NP_013775.2;	YM9796.12	128	4	4	12	5	5	15	3	3	6	0	0	2	4	4	18	6	6	16	3	3	14	1	1	3
P52910	ACS2	NP_013254.1	L9634.10	683	7	19	20	7	7	15	7	7	7	0	1	1	1	3	11	5	5	5	4	4	6	2	4	5
Q02354	UTP6	NP_010737.1	D9461.34	440	10	16	34	5	5	15	6	6	6	0	0	0	2	2	2	5	5	5	4	4	9	1	3	5
P25626	IMG1	NP_009975.1;	YCR46C	169	10	25	34	3	3	15	6	6	6	0	0	0	4	4	4	5	5	5	0	0	0	0	2	3
Q04636	POB3	NP_013642.1;		552	8	17	29	5	5	15	5	5	5	0	0	0	4	4	16	5	5	5	4	4	7	0	1	3
P32266	MGM1	NP_014854.2;	YOR50-1	881	4	6	6	5	5	15	5	5	5	0	0	0	3	3	3	5	5	5	4	4	4	0	0	1
P39742	SEC72	NP_013395.1;	L8003.18	193	7	12	26	5	5	15	4	4	11	0	0	4	5	5	16	5	5	5	0	0	0	1	1	1
Q03103	ERO1	NP_013576.1;	YM4987.05C	563	2	13	13	4	10	15	3	3	3	0	0	0	2	2	11	5	9	9	0	0	3	0	0	1
P07267	PEP4	NP_015171.1	P2585	405	4	4	4	4	4	15	0	0	0	0	0	0	2	2	2	5	5	5	3	3	3	1	3	6
Q04033		NP_010703.1;		374	3	8	23	3	3	15	0	0	0	0	0	0	1	1	1	5	5	5	0	0	0	0	0	2
P32522	PET309	NP_013168.1	L2189	965	8	22	33	4	4	15	6	6	6	0	0	0	1	3	3	4	4	4	3	3	5	1	3	5
P47167	MCM22	NP_012669.1	J2122	239	5	16	29	5	5	15	4	4	4	0	0	5	3	3	3	4	4	4	3	3	4	1	3	6
P38144	ISW1	NP_009804.1	YBR1633	1129	2	3	17	0	6	15	2	2	3	0	2	5	1	1	6	4	4	4	0	4	12	0	3	9
Q03630	BET5	NP_013634.1;		159	3	3	14	0	0	15	1	1	1	0	0	0	4	4	9	4	4	4	0	0	11	0	0	2
P39107	MNN9	NP_015275.1;	P7102.01	395	4	10	10	6	6	15	0	0	0	0	0	0	3	3	3	4	4	4	4	4	10	0	1	2
P04039	COX8	NP_013499.1;	L8084.14	78	7	22	32	8	15	15	8	8	8	0	0	0	3	3	3	3	3	3	0	0	0	0	2	6
Q06405	ATP17	NP_010665.3	D9481.21	101	9	24	35	4	14	15	5	5	5	0	0	0	2	8	14	3	3	3	3	3	3	1	3	6
P40530	PKP1	NP_012222.1;		394	5	13	13	4	12	15	5	5	5	0	0	0	1	1	1	3	3	3	3	3	3	2	2	4
P38711	RPS27B	NP_011885.1		82	9	24	31	4	15	15	6	6	6	0	2	2	3	3	5	0	2	2	3	3	3	0	3	4
P35997	RPS27A	NP_012766.1		82	9	24	31	4	15	15	6	6	6	0	1	1	3	3	5	0	2	2	3	3	3	0	3	4
P43621	RET2	NP_116709.3		546	8	20	30	3	12	15	6	6	6	0	0	0	4	4	4	0	0	0	0	0	0	0	3	3
P33301	XRS2	NP_010657.3;	D9481.13	854	6	11	30	0	0	15	3	3	3	0	0	0	2	2	2	0	0	0	0	0	0	0	1	4
P12962	CAF20	NP_014919.3;	O5453W	161	5	14	23	3	3	15	2	2	6	0	0	11	2	2	2	0	0	0	0	0	13	1	2	5
P31688	TPS2	NP_010359.1	YD8554.07	896	10	17	22	10	14	14	10	10	10	10	13	14	8	8	12	10	14	14	10	13	13	1	3	4
P35734	ASK1	NP_012872.2	YKL306	292	9	9	9	10	14	14	9	9	9	9	11	11	4	4	4	10	14	14	9	9	9	1	3	4
P40993	SNM1	NP_010766.3	D8035.21	198	6	15	15	10	14	14	10	10	10	8	8	8	2	2	2	10	13	13	10	12	12	2	3	5
P38219	OLA1	NP_009581.1	YBR0309	394	7	17	22	10	14	14	10	13	13	7	10	10	2	9	17	10	10	10	6	8	11	4	5	6
P53102	MND1	NP_011332.2	G1604	219	10	19	27	10	13	14	10	10	10	2	2	2	4	4	4	10	11	11	4	4	4	1	3	8
Q12672	RPL21B	NP_015246.1;	LPF6W	160	10	20	24	10	11	14	9	9	9	2	2	2	4	4	5	10	10	10	9	9	9	1	2	6
Q05541	NSE3	NP_010574.1;		303	10	23	42	10	11	14	8	8	8	2	2	4	7	7	7	10	12	12	10	13	25	0	2	4
P0CX45	RPL2A	NP_012246.1;NP_116688.3;	YFR031BC	254	10	25	29	10	14	14	10	14	14	1	3	3	2	2	2	10	13	13	10	14	14	1	1	3
P0CX46	RPL2B	NP_012246.1;NP_116688.3;		254	10	25	29	10	14	14	10	14	14	1	3	3	2	2	2	10	13	13	10	14	14	1	1	3
P53313	SDA1	NP_011761.3;		767	10	20	20	7	9	14	7	7	7	1	1	1	2	2	2	9	9	9	8	8	8	0	1	1
P20434	RPB5	NP_009712.1;	YBR1204	215	10	21	35	7	7	14	6	6	6	1	1	1	5	5	5	9	9	9	7	7	7	0	2	4
P40491	FMC1	NP_012168.3;		155	10	21	34	6	6	14	7	7	9	1	1	7	4	4	4	6	6	11	5	5	13	0	2	6
Q3E7X9	RPS28A	NP_014810.1	O3600	67	6	18	43	6	6	14	6	6	6	1	1	3	5	5	5	5	5	5	5	5	5	2	3	4
P40046	VTC1	NP_010995.1		129	10	21	21	10	14	14	10	10	10	0	0	0	5	5	7	10	15	15	10	15	15	0	3	3
Q12680	GLT1	NP_010110.1;		2145	10	14	15	9	12	14	10	11	11	0	7	7	6	6	17	10	19	19	10	11	11	1	1	3
P14843	ARO3	NP_010320.3	YD9673.07	370	10	20	30	10	12	14	7	7	8	0	0	1	5	11	18	10	12	12	10	13	13	1	3	5
Q03012	SPP1	NP_015187.1;		353	10	22	22	7	14	14	7	7	7	0	0	0	4	14	25	10	21	21	5	6	6	0	1	2
P28834	IDH1	NP_014361.1	N2690	360	10	25	41	7	14	14	7	7	7	0	1	1	4	4	18	10	21	21	2	2	2	1	3	4
P14063	MRPL31	NP_012784.1;		131	10	23	39	4	4	14	6	6	7	0	0	7	6	6	6	10	25	34	8	9	12	1	2	4
P25361		NP_009972.1;	YCR43C YCR725	127	6	15	26	5	5	14	6	6	6	0	0	0	4	8	24	10	20	20	6	10	10	0	0	2
P32601	DSS4	NP_015342.1;	LPZ16C YP9531.11C	143	9	18	24	7	7	14	5	5	5	0	0	0	5	5	5	10	12	12	4	4	6	1	1	2
P09440	MIS1	NP_009640.1;	YBR0751	975	9	11	23	9	9	14	4	4	4	0	0	0	5	5	5	10	14	14	10	12	12	0	1	3
P08964	MYO1	NP_011888.1;		1928	10	16	20	6	6	14	9	9	9	0	0	0	8	8	8	9	9	9	10	10	10	0	2	4
P33441	MFT1	NP_013649.1		392	10	25	35	8	8	14	8	8	8	0	0	0	3	3	10	9	9	9	4	4	10	1	3	5
P38217	KAP104	NP_009573.1;	YBR0224	918	7	7	7	5	5	14	6	6	6	0	0	1	5	7	10	9	9	9	7	7	7	1	1	1
P42943	CCT7	NP_012424.1;	J0804	550	8	17	20	6	14	14	8	8	8	0	1	1	6	6	9	8	8	8	9	17	17	0	2	3
P32333	MOT1	NP_015243.1;	LPF4C	1867	10	23	23	7	7	14	7	7	7	0	0	8	4	4	4	8	8	8	8	8	14	0	0	1
P17629	HPR1	NP_010422.1;	YD9302.14	752	4	4	4	6	6	14	7	7	7	0	0	0	5	5	5	8	8	8	6	6	8	0	2	2
P38077	ATP3	NP_009595.1;	YBR0408	311	8	23	32	8	8	14	6	6	6	0	0	0	4	4	4	8	8	8	10	12	12	0	1	5
P50086	NAS6	NP_011748.3;	G8564	228	7	7	7	6	7	14	6	6	6	0	0	0	3	3	3	8	8	8	6	6	6	0	2	3
P00330	ADH1	NP_014555.1	O0947	348	8	20	20	6	11	14	8	8	8	0	0	0	4	7	9	7	7	7	9	9	9	1	3	6
Q12263	GIN4	NP_010795.3;	D9719.13	1142	10	19	21	6	6	14	7	7	7	0	0	1	5	20	23	7	7	7	10	18	21	0	2	4
Q08446	SGT1	NP_014700.1	YOR29-08	395	5	10	10	9	14	14	5	5	5	0	0	0	3	3	3	7	7	7	5	5	5	2	5	8
P38953	RAD55	NP_010361.3;	D4426	406	7	17	17	6	14	14	4	4	4	0	0	0	4	13	23	7	7	7	5	5	5	0	1	2
P25345	SLM5	NP_009953.1;	YCR242 YCR24C	492	9	14	24	2	6	14	3	3	3	0	0	0	3	3	3	7	7	7	0	0	5	1	2	4
P0CX31	RPS24A	NP_010997.3;NP_012195.1;		135	9	24	39	5	5	14	7	7	7	0	0	0	4	4	4	6	6	6	3	3	3	1	2	5
P0CX32	RPS24B	NP_010997.3;NP_012195.1;		135	9	24	39	5	5	14	7	7	7	0	0	0	4	4	4	6	6	6	3	3	3	1	2	5
P40204	SMX2	NP_116636.1	YFL017Bw	77	9	21	24	9	9	14	6	6	6	0	0	0	3	3	7	6	6	6	6	6	9	2	5	5
P36144	UTP30	NP_012986.1		274	9	11	32	7	7	14	6	6	6	0	0	0	5	5	7	6	6	6	5	5	5	1	3	7
P00546	CDC28	NP_009718.3	YBR1211	298	10	17	36	7	7	14	6	6	6	0	0	0	3	3	3	6	6	6	4	4	8	1	3	5
P23639	PRE8	NP_013618.1;		250	7	16	32	7	9	14	6	6	6	0	0	0	6	13	13	6	6	6	3	3	3	0	1	5
P14693	SAM35	NP_011951.1;		329	10	19	34	7	7	14	5	5	5	0	0	1	6	6	11	6	6	6	10	10	15	0	1	2
P41733	GAB1	NP_013564.1;	L9122.2	394	2	2	2	5	5	14	3	3	3	0	0	0	3	3	3	6	6	6	5	5	5	1	1	1
P38902	RPB11	NP_014638.1		120	6	19	27	5	14	14	8	8	8	0	0	0	3	8	8	5	5	5	4	4	4	0	3	4
P32830	TIM12	NP_009649.1;	YBR0812	109	8	11	13	6	14	14	6	6	6	0	0	0	5	5	10	5	5	5	10	14	18	0	1	2
Q03246	MRPS17	NP_013913.1	YM8010.18C	237	10	25	50	5	11	14	6	6	6	0	0	0	2	2	2	5	5	5	3	3	9	0	3	7
P40992	RRN7	NP_012509.1;	J1273	514	10	18	21	4	4	14	5	5	5	0	0	0	4	10	21	5	5	5	5	5	5	0	0	0
P36525	MRPL24	NP_013918.1;	YM9646.05	258	10	22	45	4	4	14	6	6	19	0	0	9	1	1	5	4	4	4	3	3	16	1	2	6
P0C2H6	RPL27A	NP_011874.1		136	10	21	34	5	5	14	3	3	5	0	1	3	1	1	11	4	4	4	2	2	11	3	5	7
P38234	RFS1	NP_009608.1	YBR0505	210	7	7	22	3	7	14	2	2	2	0	0	0	3	3	3	4	4	4	0	0	0	1	3	4
P48439	OST3	NP_014728.1;	YOR3124W	350	2	4	7	0	0	14	0	0	0	0	0	0	2	2	2	4	4	4	0	0	0	0	0	5
P0CT04	PBI2	NP_014383.1	N2844	75	7	14	19	5	14	14	7	7	7	0	1	1	3	3	3	3	3	3	3	3	3	3	5	7
P36521	MRPL11	NP_010079.1;	D1070	249	10	16	35	3	3	14	4	4	4	0	0	0	2	8	8	3	3	3	0	0	1	0	1	5
P40341	YTA12	NP_013807.1;	YM9582.14C	825	9	22	37	3	3	14	1	1	9	0	0	14	2	2	7	2	2	12	0	0	9	0	1	4
P02400	RPP2B	NP_010670.3;		110	1	9	17	3	3	14	0	0	0	0	0	1	0	0	0	2	2	2	0	0	0	1	2	3
Q06696	VPS36	NP_013521.3;		566	6	14	32	6	14	14	7	7	7	0	0	0	3	3	3	0	0	0	0	0	0	0	1	3
Q08649	ESA1	NP_014887.3	O5257	445	10	20	30	10	13	13	10	11	11	10	10	13	6	6	6	10	16	16	10	11	15	1	4	7
Q12248	DAD1	NP_010299.3;		94	10	20	20	10	13	13	10	10	10	8	9	9	5	5	5	10	12	12	10	17	17	1	2	2
Q03161		NP_013817.1	YM6543.06C	297	10	24	26	9	13	13	10	10	10	7	9	9	3	3	3	8	8	8	7	7	7	2	3	6
P54999	SMX3	NP_015508.1;	P9705.4	86	10	21	31	10	13	13	9	9	9	4	4	4	5	14	14	10	12	12	10	15	15	0	2	4
P19454	CKA2	NP_014704.1;	YOR29-12	339	10	16	38	10	13	13	9	9	9	4	4	4	6	6	6	10	13	13	7	7	7	1	2	3
Q03144	SNO1	NP_013813.1	YM6543.02C	224	10	13	16	10	13	13	9	9	9	3	3	3	6	6	6	10	11	11	10	14	14	2	3	7
P25638	TAH1	NP_009986.1	YCR60W	111	10	12	21	10	13	13	9	9	9	3	3	3	1	1	4	10	17	17	10	17	17	2	3	5
P48570	LYS20	NP_010099.1;	D1298	428	10	18	18	10	13	13	8	8	8	3	3	3	4	11	11	10	14	14	10	10	10	1	2	4
Q02753	RPL21A	NP_009750.1;	YBR1401	160	10	15	22	10	10	13	9	9	9	2	2	2	4	4	5	10	10	10	9	9	9	1	2	6
P36132	KAE1	NP_012964.2;		386	9	11	11	8	8	13	6	6	6	2	2	2	5	9	13	9	9	9	10	12	18	1	1	4
P04840	POR1	NP_014343.1;	N2441 YNL2441C	283	7	7	15	7	7	13	7	7	7	1	1	2	7	7	10	8	8	8	6	6	10	0	1	5
P53833	POP3	NP_014117.1	N0586	195	8	23	30	10	13	13	9	9	9	0	0	0	5	5	5	10	15	15	10	20	28	3	5	5
P47104	RAV1	NP_012567.3;	J1590	1357	10	10	10	10	13	13	8	8	8	0	0	0	6	11	11	10	14	14	10	14	14	0	0	1
Q12161	PSH1	NP_014587.1;	O1263	406	6	13	13	9	13	13	7	7	7	0	0	0	3	3	14	10	16	16	10	16	16	0	2	2
P23968	VMA16	NP_011891.1		213	10	13	13	10	13	13	6	6	6	0	0	0	5	6	14	10	14	14	10	16	16	2	3	5
Q12446	LAS17	NP_014824.1		633	7	19	19	10	13	13	6	6	6	0	0	0	5	5	5	10	10	10	8	8	8	1	4	5
Q02950	MRP51	NP_015207.1;		344	7	22	42	5	7	13	6	8	10	0	2	8	4	8	9	10	10	10	4	4	4	0	1	5
P32379	PUP2	NP_011769.1;	G9155	260	10	21	29	10	13	13	5	5	5	0	0	0	3	7	7	10	11	11	10	14	14	0	0	2
P37299	QCR10	NP_011864.1;	YHR001BW	77	10	15	15	10	13	13	5	5	5	0	0	0	4	4	4	10	15	15	10	16	16	1	1	2
Q03048	COF1	NP_013050.1	L0596	143	10	24	36	7	7	13	5	5	5	0	0	0	5	5	5	10	10	10	6	6	6	0	4	6
P00560	PGK1	NP_009938.2	YCR12W	416	10	22	37	10	13	13	4	4	4	0	0	0	4	4	4	10	11	11	10	11	11	1	3	6
P53044	UFD1	NP_011562.1;		361	9	12	12	10	12	13	4	4	4	0	0	0	7	14	23	10	12	12	10	19	19	0	0	2
Q05568	PEX10	NP_010551.1	D9954.8	337	7	7	7	10	12	13	8	8	8	0	0	0	3	3	3	9	9	9	9	12	12	3	3	6
Q12440	APC2	NP_013228.1;	L3105 L3108	853	10	13	17	5	5	13	4	4	5	0	0	0	6	6	17	9	9	9	5	5	14	0	1	2
Q08745	RPS10A	NP_014936.1		105	9	13	24	7	7	13	8	8	8	0	0	0	3	3	3	8	8	8	8	8	8	2	4	7
Q06629	HDA2	NP_010581.3		674	10	12	12	8	8	13	6	6	8	0	0	2	3	3	7	8	8	8	8	8	20	4	5	7
P40069	KAP123	NP_011035.1;		1113	1	2	2	9	13	13	6	6	6	0	0	0	2	2	2	8	8	8	0	0	0	0	1	2
P38874	IKI1	NP_012057.3;		309	7	10	17	7	7	13	5	5	5	0	0	0	5	5	5	8	8	8	7	7	11	0	1	4
P02829	HSP82	NP_015084.1;		709	2	2	5	6	6	13	5	5	5	0	0	0	2	2	2	8	8	8	4	4	4	0	0	3
P46784	RPS10B	NP_013957.1	YM9959.12	105	7	14	25	7	7	13	8	8	8	0	0	0	2	2	2	7	7	7	8	8	8	2	4	7
P00549	CDC19	NP_009362.1;		500	9	24	34	8	8	13	7	7	7	0	3	5	3	5	13	7	7	7	2	2	3	0	0	2
P16861	PFK1	NP_011756.1;	G8599	987	7	7	9	6	6	13	5	5	5	0	0	0	4	4	8	7	7	7	6	6	11	0	2	5
Q99380	OST4	NP_010049.1;		36	4	4	14	6	6	13	3	3	7	0	0	0	4	4	11	7	7	15	6	6	14	0	0	1
P32259	SIN4	NP_014163.1;	N1135	974	4	4	4	6	13	13	5	5	5	0	0	0	2	2	2	6	6	6	10	25	25	0	1	2
P36022	DYN1	NP_012980.1;		4092	3	7	8	5	7	13	5	5	5	0	0	0	3	3	3	6	6	6	0	0	0	1	2	3
P30822	CRM1	NP_011734.3;	G8514	1084	4	5	5	5	5	13	4	4	4	0	0	0	6	6	6	6	6	6	5	5	5	0	0	3
P28627	IMP1	NP_013870.1;	YM9375.20C	190	10	10	10	4	4	13	3	3	3	0	0	0	6	6	6	6	6	6	5	5	13	1	1	1
P31412	VMA5	NP_012843.1;	YKL410	392	2	14	25	4	9	13	3	3	4	0	1	3	5	10	19	6	6	6	5	12	14	0	0	2
P41057	RPS29A	NP_013492.3;	L8084.11	56	10	22	40	6	13	13	7	7	7	0	0	0	2	11	14	5	5	5	8	8	12	0	1	3
Q04199	CAC2	NP_013605.1;		468	8	13	27	5	6	13	7	7	7	0	0	5	1	1	9	5	5	5	4	4	7	0	1	4
Q03652	DML1	NP_013938.1;	YM8261.05	475	5	11	11	6	6	13	6	6	6	0	0	0	4	4	4	5	5	5	5	5	5	0	0	3
P22354	MRPL20	NP_013011.1;	YKR405	195	6	18	30	3	3	13	5	5	5	0	0	0	4	4	7	5	5	5	4	4	14	0	2	6
P42938	TDA10	NP_011721.3	G7737	290	10	11	11	6	6	13	4	4	4	0	0	0	5	5	20	5	5	5	6	6	13	2	3	5
Q02204	MRPL13	NP_012931.4	YK105	264	10	18	21	5	5	13	4	4	7	0	0	10	2	2	2	5	5	14	6	6	27	1	3	6
P46672	ARC1	NP_011410.1	G3085	376	6	11	11	5	10	13	3	3	3	0	0	0	5	5	5	5	5	5	1	1	1	1	3	4
Q02721	REC102	NP_013433.2;	L8543.17	264	4	9	25	3	3	13	2	2	2	0	0	0	3	3	17	5	5	7	0	0	6	0	1	1
P33892	GCN1	NP_011320.3;	G1318	2672	10	25	39	3	12	13	6	6	6	0	0	0	3	3	3	4	4	4	0	0	0	0	2	3
Q12146	PSF3	NP_014495.2;		194	6	12	24	5	5	13	5	5	5	0	0	0	4	9	25	4	4	4	4	4	4	0	1	3
P39103	COX14	NP_013577.1;	YM4987.06C	70	8	13	13	4	4	13	4	4	6	0	0	3	2	2	2	4	4	16	3	3	3	1	1	3
P33300	SUR1	NP_015268.1;		382	3	3	11	4	4	13	0	0	0	0	0	0	0	0	8	4	4	4	3	3	11	2	2	4
P53067	KAP114	NP_011273.1;	HRC1004	1004	6	12	12	4	11	13	7	7	7	0	0	0	3	3	3	3	3	3	5	5	5	0	1	2
Q03976	RSM24	NP_010460.1		319	10	20	33	4	4	13	5	5	6	0	0	9	2	2	2	3	3	3	4	4	22	2	3	4
P38064	MRPL16	NP_009515.1;	YBL0411	232	4	14	27	4	11	13	4	4	5	0	0	0	3	8	8	3	3	3	0	0	0	0	2	6
P23059	MAK31	NP_009948.1;	YCR20C-A	88	7	7	13	4	4	13	0	0	0	0	0	0	3	3	3	3	3	3	0	0	4	1	1	1
P38109		NP_009697.3;	YBR1015	508	3	3	11	2	2	13	0	0	0	0	0	0	1	1	1	1	1	1	0	0	0	1	2	4
P22141	PRE1	NP_010928.1;		198	9	24	38	1	1	13	3	3	3	0	0	0	2	2	2	0	0	0	0	0	5	0	1	3
Q03705	CGI121	NP_013676.2		181	10	15	26	2	3	13	2	2	2	0	0	0	4	4	4	0	0	0	0	0	0	0	3	4
P38153	APM3	NP_009847.4;	YBR2035	483	2	2	11	2	2	13	1	1	1	0	0	0	5	5	13	0	0	0	0	0	0	1	2	3
P16370	RPB3	NP_012243.3;		318	10	19	25	10	12	12	10	10	10	8	8	8	3	3	3	10	12	12	6	6	6	1	2	2
Q05676	SOM1	NP_058154.3;	YEL059BC	74	10	25	25	10	12	12	10	10	10	7	10	10	5	5	5	10	12	12	4	4	4	0	0	3
P38249	RPG1	NP_009635.1;	YBR0734	964	10	11	22	10	12	12	10	10	10	6	6	6	6	6	6	10	15	15	6	6	6	0	2	2
P22082	SNF2	NP_014933.3;		1703	10	13	13	10	10	12	7	7	7	5	11	13	5	5	8	10	12	13	10	15	25	0	0	2
Q08754	BUD7	NP_014943.1;		746	10	11	22	7	7	12	7	7	7	2	2	4	4	4	8	8	8	8	8	8	13	1	1	2
P06367	RPS14A	NP_009960.2;	YCR31C	137	10	13	31	8	8	12	6	6	6	2	2	11	5	5	5	7	7	7	8	8	8	0	0	3
P49957	TRM9	NP_013698.1;	YM9571.04	279	5	9	16	10	12	12	8	8	8	1	1	1	1	1	6	10	11	11	10	10	16	1	2	4
Q06580	MLC2	NP_015514.1;	P9677.10	163	10	10	22	8	8	12	7	7	7	1	1	1	6	6	6	9	9	9	7	7	7	0	2	4
P38324	SLX1	NP_009787.3;	YBR1525	304	10	11	29	7	7	12	5	5	9	1	1	3	1	1	11	9	9	9	10	11	11	1	2	3
Q12341	HAT1	NP_015324.1;	LPA16W YP8132.12	374	10	17	24	10	12	12	9	9	9	0	0	0	6	6	6	10	18	18	10	13	13	1	1	3
P10659	SAM1	NP_013281.1;	L9470.9	382	6	14	14	5	12	12	9	9	9	0	0	0	4	14	14	10	17	17	10	15	15	0	1	3
P34221	PTC3	NP_009497.2;	YBL0511 YBL0513	468	9	16	16	5	9	12	9	9	9	0	0	0	4	8	8	10	15	15	8	8	8	0	1	1
P38768	PIH1	NP_011899.1;		344	10	25	34	3	10	12	9	9	9	0	0	0	2	2	2	10	10	10	3	3	7	1	2	5
P04387	GAL80	NP_013661.1;	YM9827.01 YM9958.12	435	10	19	19	10	12	12	8	8	8	0	0	0	6	6	6	10	14	14	10	14	14	1	1	3
P53063	RAI1	NP_011268.1	NRE387	387	9	24	37	5	11	12	7	7	7	0	0	0	3	3	3	10	15	15	6	6	6	1	3	4
P32559	MSS1	NP_013736.1;	YM9711.13C	526	9	17	28	10	12	12	6	6	6	0	0	0	4	4	4	10	10	10	6	6	6	0	1	2
Q6WNK7	SUS1	NP_878049.2;		96	7	7	10	8	8	12	6	6	6	0	0	0	5	5	5	10	10	10	4	4	4	1	1	5
P05318	RPP1A	NP_010202.1;		106	4	4	4	7	12	12	4	4	4	0	0	0	4	4	4	10	21	21	6	6	6	0	1	2
Q07913	NSE1	NP_013107.1;		336	10	15	15	10	12	12	9	9	9	0	0	0	1	1	1	9	9	9	10	14	17	0	1	1
P39731	MTW1	NP_009367.1;	YAL034AW	289	8	19	19	9	9	12	8	8	8	0	0	0	7	7	7	9	9	9	10	10	10	0	0	4
P53333	CWC22	NP_011794.3;		577	10	17	17	9	9	12	8	8	8	0	0	0	6	6	6	9	9	9	6	6	6	0	1	1
P11745	RNA1	NP_013962.1;	YM9959.17C	407	10	21	28	7	12	12	8	8	8	0	0	0	2	2	2	9	9	9	4	4	4	0	2	5
P0C0W1	RPS22A	NP_012345.1;	J0355	130	6	18	22	6	12	12	7	7	7	0	0	0	4	4	4	9	9	9	3	3	3	0	2	5
P38193	PSY4	NP_009507.1;	YBL0402	441	9	11	23	10	12	12	7	7	7	0	0	0	7	7	7	8	8	8	10	15	15	0	1	3
P15303	SEC23	NP_015507.1;	P9705.14	768	10	19	25	7	10	12	6	6	6	0	0	0	6	13	20	8	8	8	10	15	19	0	0	1
P40090	SCC4	NP_011074.3;		624	8	8	8	7	7	12	6	6	6	0	0	0	4	4	4	8	8	8	7	7	7	1	1	3
P36097	TTI1	NP_012892.1;	YKL246	1038	9	15	24	6	6	12	5	5	5	0	0	0	7	7	7	8	8	8	9	9	9	1	1	4
Q08723	RPN8	NP_014904.3;	O5360	338	10	19	39	6	8	12	5	5	5	0	0	0	2	2	2	8	8	8	7	7	7	1	1	3
P14306	TFS1	NP_013279.1;	L9470.19	219	4	4	4	6	6	12	5	5	5	0	0	3	2	2	6	8	8	8	4	4	4	0	2	2
Q12530	RMP1	NP_013246.1;		201	5	8	15	7	8	12	6	6	6	0	0	0	5	5	5	7	7	7	8	8	8	0	1	2
P12385	SUP45	NP_009701.3	YBR1120	437	9	13	28	7	11	12	6	6	6	0	0	0	3	3	7	7	7	7	6	8	14	1	5	7
P40512	PCI8	NP_085069.3;		444	10	13	13	5	8	12	5	5	5	0	0	0	3	3	3	7	7	7	7	7	7	1	2	3
P38254	PBY1	NP_009652.2;	YBR0821	753	9	15	15	8	12	12	7	7	7	0	0	0	6	13	13	6	6	6	10	14	14	0	0	4
Q03496	TRM732	NP_013986.1;	YM8156.01C YM9920.13C	1420	10	15	24	6	6	12	6	6	6	0	0	0	5	5	5	6	6	6	6	6	6	0	1	3
P32561	RPD3	NP_014069.1;	N0305	433	10	20	23	5	6	12	5	5	5	0	0	0	5	8	18	6	6	6	9	9	9	0	2	3
P32800	PEX2	NP_012325.1 [P32800-1];	HRA271 J0240	271	10	14	14	5	5	12	5	5	5	0	0	0	3	3	3	6	6	6	3	3	3	0	1	2
P46682	APL6	NP_011777.3;	G9331	809	5	13	19	5	5	12	5	5	5	0	0	0	4	4	4	6	6	6	3	3	3	0	1	2
P46965	SPC1	NP_012544.1	YJR010BW	94	9	22	22	6	10	12	4	4	4	0	0	0	2	2	2	6	6	6	5	5	5	1	3	4
Q04749	AVO2	NP_013784.1;	YM9916.07	426	8	9	20	6	6	12	4	4	4	0	0	0	2	2	8	6	6	6	4	4	14	1	2	2
P38121	POL12	NP_009518.1;	YBL0414	705	4	13	18	6	9	12	9	9	9	0	0	0	5	9	9	5	5	5	10	16	22	0	1	3
P43321	SMD3	NP_013248.1;	L9634.6	101	6	13	22	5	5	12	7	7	7	0	0	4	4	4	4	5	5	5	5	5	5	1	1	2
P39111	VMA7	NP_011534.1;		118	5	14	32	4	4	12	6	6	8	0	3	10	1	1	1	5	5	5	4	4	4	1	1	4
P39678	MBP1	NP_010227.1;		833	9	15	30	6	7	12	5	5	5	0	0	0	3	3	3	5	5	5	4	4	4	0	0	6
P53861	ELA1	NP_014169.1;	N1161	379	3	13	21	6	12	12	5	5	5	0	0	0	2	2	2	5	5	5	3	3	3	1	1	6
P38697	IMD2	NP_012088.3;		523	7	22	22	5	12	12	5	5	5	0	0	0	2	11	11	5	5	5	3	3	3	1	2	3
P47083	MPP10	NP_012535.3	J1411 YJR83.5	593	3	18	33	5	9	12	5	5	5	0	0	1	4	4	4	5	5	5	3	3	3	1	3	7
Q12335	PST2	NP_010315.1;	D3422 YD9673.02C	198	2	2	2	1	8	12	2	2	2	0	0	0	3	3	5	5	5	5	0	0	0	0	2	3
Q05787	HRD3	NP_013308.1;		833	2	6	13	0	0	12	0	0	4	0	0	2	1	1	1	5	5	5	0	0	3	0	0	2
P36523	MRPL15	NP_013416.2;	YLR312BW	253	6	13	37	7	7	12	7	7	10	0	0	3	3	3	16	4	4	4	10	12	16	0	0	1
P38204	RRN10	NP_009528.1;	YBL0426	145	3	10	31	5	5	12	6	6	6	0	0	1	4	4	4	4	4	4	3	3	3	0	1	4
P12753	RAD50	NP_014149.1;	N0872	1312	7	17	24	5	12	12	4	4	4	0	0	0	2	2	6	4	4	4	0	0	0	1	1	4
Q12745	SEC39	NP_013545.3;		709	2	11	21	3	8	12	2	2	2	0	0	0	0	0	0	4	4	4	2	2	2	0	2	4
Q04549	ARP10	NP_010391.1;	YD8557.15 YD9727.02	284	3	16	27	3	3	12	2	2	2	0	0	0	3	3	3	4	4	4	1	1	1	0	0	4
P33893	PET112	NP_009473.2;	YBL0724	541	2	15	15	3	3	12	2	2	2	0	0	0	1	1	1	4	4	4	0	3	7	0	1	4
P39706	SWD1	NP_009403.1;	FUN16	426	8	22	24	3	12	12	5	5	5	0	0	0	3	3	6	3	3	3	4	4	4	0	2	2
P32366	VMA6	NP_013552.3;	L9324.8	345	8	11	11	4	4	12	3	3	3	0	0	0	5	5	5	3	3	3	3	3	3	0	0	1
P13099	TOP3	NP_013335.1	L8083.3	656	3	13	17	3	7	12	5	5	5	0	0	0	2	7	17	0	1	1	0	5	8	2	3	4
P32479	HIR1	NP_009545.2	YBL0318	840	10	24	41	3	7	12	4	4	4	0	0	0	1	1	8	0	0	0	4	4	4	2	3	5
P10664	RPL4A	NP_009587.1;	YBR0315	362	7	18	19	8	8	11	9	9	9	10	15	19	5	5	5	10	19	19	10	16	16	0	0	2
P49626	RPL4B	NP_010295.3;	YD8119.17	362	7	18	19	8	8	11	9	9	9	10	15	19	5	5	5	10	19	19	10	16	16	0	0	2
P39984	HAT2	NP_010858.3;		401	10	15	15	10	11	11	8	8	8	6	7	7	3	3	3	10	12	12	10	10	10	1	2	2
P02407	RPS17A	NP_013688.1		136	10	25	42	10	11	11	8	8	8	4	4	4	3	3	3	10	11	11	6	6	6	2	4	7
P14127	RPS17B	NP_010735.3		136	10	25	42	10	11	11	8	8	8	4	4	4	3	3	3	10	11	11	6	6	6	2	4	7
Q12517	DCP1	NP_014492.1;		231	9	12	12	10	11	11	7	7	7	4	4	4	5	5	5	10	11	11	10	11	11	0	1	4
P10081	TIF1; TIF2	NP_012397.1;NP_012985.3;	; J0660	395	10	16	16	10	11	11	9	9	9	3	3	3	4	4	4	10	14	14	9	9	9	0	2	2
Q06406	LSM6	NP_010666.2;	D9481.18	86	10	20	20	10	11	11	8	8	8	3	3	3	7	7	7	10	11	11	10	11	11	1	2	3
Q06214	JIP5	NP_015495.2		492	10	17	17	10	11	11	8	8	8	2	2	2	3	3	3	10	12	12	10	13	16	4	5	5
P0CX42	RPL23B	NP_009466.1;NP_011042.3;		137	9	9	19	8	8	11	7	7	7	1	1	1	6	9	11	10	10	10	10	10	10	1	1	2
P0CX41	RPL23A	NP_009466.1;NP_011042.3;	YBL0713	137	9	9	19	8	8	11	7	7	7	1	1	1	6	9	11	10	10	10	10	10	10	1	1	2
P47124	HOC1	NP_012609.3;	J1830	396	10	11	11	9	9	11	5	5	5	1	1	1	5	5	5	10	10	10	10	10	10	2	2	4
Q92317	NCB2	NP_010685.1;		146	10	15	19	10	11	11	9	9	9	0	0	0	6	6	6	10	13	13	10	12	13	0	2	3
P33323	REC104	NP_012027.1;		182	10	16	31	9	9	11	8	8	8	0	0	0	4	4	4	10	10	10	10	10	10	1	1	5
P32912	VAM7	NP_011303.1		316	10	25	42	10	11	11	7	7	7	0	0	0	5	5	5	10	10	10	10	10	10	1	5	9
P15705	STI1	NP_014670.1	OR26.17	589	9	18	30	10	11	11	7	7	7	0	0	0	3	3	3	10	14	14	10	18	18	1	3	4
P32327	PYC2	NP_009777.1	YBR1507	1180	10	25	37	10	11	11	7	7	7	0	0	0	4	4	4	10	11	11	7	7	7	2	4	4
P34216	EDE1	NP_009506.1;	YBL0501 YBL0520	1381	10	13	13	8	11	11	7	7	7	0	0	1	4	4	4	10	14	14	4	4	6	0	1	1
P34760	TSA1	NP_013684.1		196	10	21	21	10	11	11	6	6	6	0	0	0	2	2	2	10	14	14	10	10	10	1	3	6
P47821	SSN8	NP_014373.3;	N2805	323	10	13	13	8	8	11	6	6	6	0	0	0	6	6	6	10	16	16	10	11	16	0	2	4
P38985	SRP14	NP_010191.1;	D2404	146	10	13	25	5	5	11	6	6	10	0	0	7	7	8	14	10	12	15	10	10	18	0	2	3
P48581	RAD17	NP_015013.1;		401	4	6	10	10	11	11	6	6	6	0	0	0	3	3	3	10	25	32	3	3	3	1	1	2
P43535	GCN20	NP_116664.1;		752	9	16	16	10	11	11	5	5	5	0	0	0	3	3	3	10	15	15	10	17	17	1	1	2
Q07980	MLH2	NP_013135.1;		695	10	14	25	10	11	11	5	5	5	0	0	0	5	5	5	10	11	11	6	6	6	0	1	3
P32795	YME1	NP_015349.1;	YP9367.04	747	10	24	39	5	5	11	5	5	5	0	0	1	5	5	5	10	11	27	6	6	12	1	1	6
P22213	SLY1	NP_010475.1;	YD9346.01 YD9395.22	666	8	14	20	10	11	11	4	4	4	0	0	0	1	1	6	10	11	11	10	12	12	1	2	3
P17967	PDI1	NP_009887.1;	YCL313 YCL43C	522	5	5	5	5	6	11	3	3	3	0	0	0	4	4	4	10	20	20	6	6	6	1	1	2
P47048		NP_012486.3;	J1162	450	10	25	25	10	11	11	7	7	7	0	0	0	3	12	16	9	9	9	10	11	11	1	2	2
P10862	RAD18	NP_009992.1;	YCR66W	487	10	18	18	10	11	11	6	6	6	0	0	0	6	6	6	9	9	9	10	13	13	0	0	2
P38696	ARP1	NP_011997.1;		384	6	15	21	6	6	11	6	6	6	0	0	0	4	8	10	9	9	9	10	10	10	0	1	4
Q12158	MCD1	NP_010281.1;	YD8119.04	566	8	10	12	6	6	11	7	7	7	0	0	1	5	5	5	8	8	8	5	5	5	0	1	2
P19414	ACO1	NP_013407.1;	L8003.22	778	9	24	41	7	8	11	6	6	6	0	0	0	2	2	2	8	8	8	7	7	7	1	1	3
P41909	PXA1	NP_015178.1;	LPI1W P2607	870	7	7	11	8	8	11	5	5	5	0	0	0	4	4	4	8	8	8	5	5	10	1	2	4
P35203	CTF13	NP_013812.1;	YM6543.01 YM9582.19	478	8	8	17	5	5	11	4	4	4	0	0	0	4	4	21	8	8	9	5	5	5	0	1	3
P32904	MRPL6	NP_012017.1;		214	6	10	21	5	5	11	3	3	3	0	0	0	3	3	3	8	8	8	0	0	0	0	0	1
P32829	MRE11	NP_013951.1;	YM9959.06C	692	7	19	21	6	10	11	9	9	9	0	1	1	6	13	19	6	6	6	5	7	7	0	0	2
P48362	HGH1	NP_011703.3;	G7538	394	3	8	24	6	6	11	8	8	8	0	0	0	3	3	13	6	6	6	3	3	3	0	0	3
P21524	RNR1	NP_010993.1		888	10	17	27	10	11	11	7	7	7	0	0	0	2	2	2	6	6	6	10	10	10	2	3	5
P25359	RRP43	NP_009964.2;	YCR35C YCR522	394	10	20	20	10	11	11	7	7	7	0	0	0	4	4	4	6	6	6	6	6	6	0	0	1
Q03290	TFB3	NP_010748.3;		321	5	17	17	10	11	11	6	6	6	0	0	0	2	2	3	6	6	6	10	11	11	1	2	3
P38826	ORC6	NP_011986.1;		435	6	18	25	6	11	11	6	6	6	0	0	0	1	7	9	6	6	6	5	5	5	0	1	5
P33312	RIB7	NP_009711.3;	YBR1203	244	5	7	18	5	5	11	6	6	9	0	0	5	4	4	8	6	6	6	5	5	13	0	0	0
P39993	GEA2	NP_010892.1;		1459	10	14	14	5	5	11	5	5	5	0	0	0	5	5	5	6	6	6	6	6	6	0	1	3
P39727	ERV46	NP_009358.1;	FUN9	415	10	25	30	6	11	11	5	5	5	0	0	0	5	5	5	6	6	6	5	5	5	1	2	2
P32388	MRP49	NP_012754.1	YKL631	137	2	16	25	6	6	11	5	5	5	0	0	1	1	1	1	6	6	6	0	0	1	2	3	6
Q04149	MUS81	NP_010674.3;	D9509.6	632	5	8	20	6	6	11	4	4	4	0	0	6	4	4	4	6	6	6	7	7	15	1	2	5
P53540	SPC98	NP_014273.1;	N1222 N1879	846	3	3	13	5	5	11	4	4	4	0	0	0	3	3	3	6	6	6	4	4	6	0	0	1
P0CX23	RPL20A	NP_013969.3;NP_014957.2;	YM9408.04C	172	10	23	23	5	11	11	6	6	6	0	0	0	0	0	0	5	5	5	8	16	16	1	2	5
P0CX24	RPL20B	NP_013969.3;NP_014957.2;	O6116	172	10	23	23	5	11	11	6	6	6	0	0	0	0	0	0	5	5	5	8	16	16	1	2	5
Q06440	CRN1	NP_013533.1	L9576.2	651	10	21	30	7	11	11	5	5	5	0	0	0	3	3	3	5	5	5	5	5	5	2	4	8
Q03654	CEF1	NP_013940.1;	YM8261.07	590	9	12	17	5	5	11	5	5	5	0	0	0	5	5	5	5	5	5	3	3	3	1	2	6
P00942	TPI1	NP_010335.1	YD9609.05C	248	10	18	29	3	11	11	5	5	5	0	0	0	5	7	7	5	5	5	0	0	0	0	3	3
Q02792	RAT1	NP_014691.1;		1006	9	22	24	4	4	11	4	4	4	0	0	0	3	3	18	5	5	5	5	5	15	0	2	2
P32914	SPT4	NP_011577.3;		102	6	16	16	5	8	11	3	3	3	0	0	0	2	11	24	5	5	5	3	3	3	0	0	0
Q06672	TSR2	NP_013539.4;		205	9	20	20	6	8	11	8	8	8	0	0	0	4	4	4	4	4	4	4	4	4	0	1	3
P06844	SPT3	NP_010680.1;	D9509.12	337	5	14	18	7	11	11	7	7	7	0	0	2	1	6	6	4	4	4	5	9	9	2	2	3
P41058	RPS29B	NP_010222.1;		56	10	23	42	6	11	11	6	6	6	0	0	0	2	10	13	4	4	4	9	10	14	0	1	3
P50942	INP52	NP_014293.1	N2160	1183	10	25	50	4	4	11	6	6	6	0	0	0	3	3	3	4	4	4	1	1	1	2	3	5
P09959	SWI6	NP_013283.1;	L9470.8	803	2	13	13	5	5	11	6	6	12	0	0	8	0	2	9	4	4	6	0	0	10	0	0	1
P29295	HRR25	NP_015120.1;		494	10	25	36	5	5	11	5	5	5	0	0	0	2	14	15	4	4	4	5	5	8	1	2	3
P36056	RSM22	NP_012767.1	YKL610	628	10	24	45	5	5	11	5	5	5	0	0	7	3	3	3	4	4	10	3	3	6	1	3	4
Q12754	RRP12	NP_015313.1		1228	3	7	18	5	8	11	5	5	5	0	0	0	2	2	2	4	4	4	3	3	3	1	4	5
P53909	AAH1	NP_014258.1;	N1208 N1825	347	5	8	15	5	5	11	5	5	5	0	0	0	1	1	1	4	4	4	0	0	0	0	1	3
P38886	RPN10	NP_012070.3;		268	5	18	23	3	6	11	5	5	5	0	1	4	1	7	14	4	4	4	0	1	11	0	0	1
P43569	CAF16	NP_116625.1;		289	4	18	21	4	11	11	4	4	4	0	0	0	1	1	1	4	4	4	0	0	0	0	2	3
P47064	APS3	NP_012510.3	J1274	194	6	17	27	0	0	11	2	2	2	0	0	0	1	1	1	4	4	4	0	0	10	2	3	5
P32599	SAC6	NP_010414.3	YD9302.04C	642	10	18	32	4	4	11	3	3	3	0	0	5	1	1	1	3	3	3	0	0	7	2	3	6
Q03153	ATP25	NP_013816.1	YM6543.05C	612	9	16	23	3	3	11	2	2	2	0	0	2	2	2	6	3	3	12	3	3	12	1	3	6
P53871	DUG3	NP_014208.1;	N1410	357	9	24	37	0	0	11	4	4	4	0	0	0	1	1	13	0	0	0	0	0	9	2	2	2
P41318	LST8	NP_014392.3;	N2005	303	5	8	19	4	4	11	3	3	3	0	0	2	3	3	3	0	0	0	0	0	0	0	0	2
P32582	CYS4	NP_011671.3;	G6667	507	10	21	34	10	10	10	9	10	10	10	12	12	5	5	5	10	12	12	10	16	18	1	1	6
Q03327	UGO1	NP_010758.3;		502	9	17	19	10	10	10	9	12	12	9	11	11	7	15	29	10	17	17	10	11	11	0	0	2
P32836	GSP2	NP_014828.1;		220	10	24	31	8	8	10	8	8	8	2	2	2	4	11	14	10	10	10	10	18	18	0	2	5
P39516	RPS14B	NP_012344.1;	J0354	138	8	12	29	7	7	10	6	6	6	2	2	10	4	4	4	9	9	9	10	10	10	0	0	3
P38861	NMD3	NP_012040.1;		518	9	10	12	10	10	10	8	8	8	1	1	1	4	10	16	10	13	13	10	13	13	0	0	1
P23638	PRE9	NP_011651.3;		258	10	18	18	10	10	10	9	9	9	0	0	0	6	6	6	10	11	11	10	10	10	0	0	1
Q02685	RMI1	NP_015301.1;		241	8	15	21	9	10	10	9	9	9	0	1	1	6	14	14	10	23	23	10	16	16	0	0	0
P40958	MAD2	NP_012504.3;	J1256	196	10	13	23	10	10	10	7	7	7	0	0	0	6	6	6	10	11	11	10	11	11	1	1	4
Q06218	DBP9	NP_013378.1;	L9328.3	594	10	17	17	10	10	10	6	6	6	0	0	0	4	4	4	10	10	10	10	10	10	2	2	3
Q12493	NKP1	NP_010671.4;		238	3	3	3	6	6	10	6	6	6	0	0	0	8	8	8	10	15	15	5	5	5	0	0	3
P32776	TFB1	NP_010597.3;	D9740.3	642	4	9	25	7	7	10	6	6	6	0	0	12	3	3	3	9	9	9	7	7	7	1	1	3
P40217	TIF34	NP_013866.1	YM9375.16C	347	10	20	25	7	7	10	8	8	8	0	0	0	2	2	9	8	8	8	7	7	7	2	4	5
P22007	RAM1	NP_010193.1;	D2412	431	10	25	41	7	7	10	7	7	7	0	0	0	2	2	2	8	8	8	6	6	6	0	2	4
P14540	FBA1	NP_012863.1;	YKL320	359	9	16	16	6	6	10	5	5	5	0	0	0	1	1	1	8	8	8	4	4	4	2	2	4
P46151	MET12	NP_015302.1;	LPB8C	657	9	23	23	5	5	10	5	5	5	0	0	2	2	2	2	8	8	8	3	3	3	0	1	1
P25045	LCB1	NP_014025.1;		558	10	15	17	7	7	10	4	4	4	0	0	0	2	2	2	8	8	8	10	10	11	1	1	3
P07258	CPA1	NP_014947.3;		411	7	16	19	7	7	10	7	7	7	0	0	0	4	14	23	7	7	7	8	8	12	1	1	2
P53903	PGA2	NP_014250.1;	N1774	129	6	6	6	5	5	10	3	3	3	0	0	0	4	4	4	7	7	19	6	6	6	0	2	4
Q06224	YSH1	NP_013379.1;		779	10	22	22	7	10	10	7	7	7	0	0	0	5	12	12	6	6	6	6	6	6	1	1	3
P38788	SSZ1	NP_011931.2;		538	8	18	18	6	6	10	7	7	8	0	0	0	5	9	15	6	6	6	5	5	5	0	1	1
P52488	UBA2	NP_010678.3;	D9509.10	636	9	19	23	6	10	10	7	7	7	0	0	0	4	4	4	6	6	6	4	4	4	0	2	3
Q12207	NCE102	NP_015475.1;	P9659.2	173	1	1	1	3	3	10	0	0	0	0	0	0	2	2	2	6	6	6	0	0	0	0	0	0
Q03956	RAV2	NP_010488.1	YD9346.12C	351	10	19	27	6	10	10	7	7	7	0	0	0	5	9	9	5	5	5	7	7	7	0	3	5
Q12154	GET3	NP_010183.1;	D2371	354	6	17	17	6	6	10	7	7	7	0	0	0	4	8	16	5	5	5	5	5	11	0	2	4
P53195	COG7	NP_011510.1;		279	9	13	21	6	6	10	5	5	5	0	0	0	6	6	6	5	5	5	0	0	0	0	0	0
P36533	MRPL39	NP_013705.1	YM9571.09C	70	9	19	42	9	9	10	4	4	4	0	0	0	3	3	3	5	5	5	6	6	6	3	4	8
P39995	EAF5	NP_010897.1;		279	4	12	14	6	10	10	4	4	4	0	0	0	2	2	11	5	5	5	5	5	5	1	2	3
O13525	COQ4	NP_010490.1;	YD8142.01	335	9	21	23	6	6	10	3	3	3	0	0	0	4	4	4	5	5	5	0	0	2	0	1	2
P00163	COB	NP_009315.1;		385	5	5	5	6	10	10	2	2	2	0	0	0	2	9	12	5	5	5	3	3	3	1	1	1
Q9ZZW7	BI3	NP_009317.1;		517	5	5	5	6	10	10	2	2	2	0	0	0	2	9	12	5	5	5	3	3	3	1	1	1
P03879	BI4	NP_009316.1;		638	5	5	5	6	10	10	2	2	2	0	0	0	2	9	12	5	5	5	3	3	3	1	1	1
Q02336	ADA2	NP_010736.3;	D9461.33	434	9	15	15	5	5	10	0	0	0	0	0	0	3	3	15	5	5	5	4	4	12	1	1	2
P38334	TRS20	NP_009813.1;	YBR1722	175	8	15	19	3	5	10	6	7	8	0	2	3	2	3	10	4	4	4	1	1	4	2	2	3
P53397	OGG1	NP_013651.1	YM9958.02	376	9	9	17	6	6	10	4	4	4	0	0	0	2	2	2	4	4	4	3	3	3	2	3	6
P12695	LAT1	NP_014328.3;	N2374	482	10	21	26	5	10	10	4	4	4	0	0	5	2	2	7	4	4	4	0	0	11	0	0	0
P40547	VID28	NP_012247.3		921	4	8	8	5	8	10	3	3	3	0	0	0	3	3	3	4	4	4	3	3	3	1	3	5
Q07834		NP_013068.1;		825	5	14	16	4	4	10	3	3	3	0	0	0	4	4	4	4	4	4	2	2	2	1	1	5
P38247	SLM4	NP_009633.3	YBR0723	162	6	15	16	5	5	10	5	5	5	0	0	0	2	2	7	3	3	3	10	20	20	2	3	4
P47130	CSN12	NP_012617.1;	J1860	423	8	23	46	2	2	10	4	4	4	0	0	1	3	3	3	3	3	3	4	4	8	0	2	6
P32916	SRP101	NP_010578.3;	D9819.3	621	9	11	16	4	4	10	4	4	4	0	0	0	4	4	4	3	3	3	0	0	0	0	2	3
P40070	LSM4	NP_011037.3;		187	2	2	3	3	3	10	3	3	3	0	0	5	3	3	3	3	3	7	0	0	0	1	2	2
P38265	IML3	NP_009665.3	YBR0836	245	6	6	19	2	2	10	3	3	3	0	0	0	3	3	14	3	3	3	0	0	10	1	3	3
P46944	TRS85	NP_010393.3;	YD9727.04	698	2	6	15	4	10	10	2	2	2	0	0	0	3	3	3	3	3	3	0	6	6	0	1	3
P38273	CCZ1	NP_009689.3;	YBR1006	704	8	16	16	2	10	10	4	4	4	0	0	0	3	9	11	2	2	2	0	0	0	0	1	2
P06839	RAD3	NP_011098.3;		778	10	13	17	3	3	10	1	1	1	0	0	0	3	3	14	0	0	0	0	0	2	1	2	5
P23561	STE11	NP_013466.1;	L8039.10	717	10	18	18	9	9	9	10	13	13	3	4	4	5	5	5	10	16	16	10	20	20	0	1	1
Q12522	TIF6	NP_015341.1;	LPZ15C	245	10	18	18	9	9	9	6	6	6	3	3	3	5	5	5	10	10	10	10	11	11	0	1	1
Q04002	SCC2	NP_010466.3;	YD9395.14	1493	10	12	16	9	9	9	7	7	7	2	2	2	5	5	5	10	10	10	10	11	11	2	2	4
P47079	CCT8	NP_012526.1;	J1374	568	10	13	13	9	9	9	8	8	8	1	1	1	6	17	23	10	12	12	10	11	11	0	1	2
Q08096	RCL1	NP_014633.1;		367	10	18	38	9	9	9	9	9	9	0	0	0	7	7	15	10	14	14	10	14	14	1	1	5
P40155	PEX17	NP_014185.1;	N1319	199	10	22	22	7	9	9	8	8	8	0	0	0	7	19	20	10	11	11	10	10	10	0	2	3
P16658	SEN2	NP_013206.1	L8004.12	377	10	23	23	9	9	9	7	7	7	0	0	0	3	9	9	10	10	10	10	13	13	2	3	5
P12612	TCP1	NP_010498.1;	YD8142.13 YD8142B.04	559	10	23	30	9	9	9	7	7	7	0	0	0	6	15	15	10	11	11	10	13	13	0	1	3
P32835	GSP1	NP_013396.1;	L8003.19	219	10	24	32	7	8	9	7	7	7	0	0	0	4	13	15	10	10	10	10	11	11	0	2	5
Q03558	OYE2	NP_012049.1		400	10	25	36	7	7	9	7	7	9	0	0	3	3	3	12	10	10	10	8	8	22	2	4	4
P30777	GPI10	NP_011373.1;		616	9	15	15	9	9	9	6	6	6	0	0	0	2	2	2	10	10	10	10	13	13	2	2	3
P21243	SCL1	NP_011504.3;		252	7	14	25	9	9	9	6	6	6	0	0	0	3	3	3	10	12	12	10	14	14	0	0	2
P21306	ATP15	NP_015052.1;	P0345	62	4	4	18	5	5	9	3	3	4	0	0	2	4	4	4	10	25	28	6	6	12	1	1	3
Q03774	TRM82	NP_010449.1;	YD8358.19	444	8	14	16	5	5	9	2	2	2	0	0	0	3	3	5	10	14	28	6	10	27	0	1	4
Q06091	SNT309	NP_015426.1		175	9	17	38	7	8	9	7	7	7	0	0	1	6	11	11	9	9	9	9	9	20	2	5	8
P52917	VPS4	NP_015499.1;	P9705.10	437	8	12	12	6	6	9	6	6	6	0	0	0	7	7	7	9	9	13	6	6	8	1	2	5
P38328	ARC40	NP_009793.1	YBR1532	384	10	13	19	9	9	9	5	5	5	0	0	0	7	7	7	9	9	9	9	9	9	2	4	5
P38907	CHL4	NP_010540.3;	YD9320A.04	458	10	15	15	9	9	9	8	8	8	0	0	0	5	5	5	8	8	8	10	11	11	0	2	3
P43601	ATG18	NP_444297.1;		500	9	14	14	9	9	9	8	8	8	0	0	0	7	13	20	8	8	8	7	7	7	0	1	3
P16521	YEF3	NP_013350.1;	L9672.5	1044	5	5	5	9	9	9	7	7	7	0	0	0	4	4	4	8	8	8	5	5	5	1	2	2
P07257	QCR2	NP_015517.1;	P9677.6	368	7	22	37	7	9	9	6	6	6	0	0	0	1	1	1	8	8	8	0	0	0	0	0	3
P21954	IDP1	NP_010217.1		428	10	24	41	9	9	9	5	5	5	0	0	0	4	4	4	8	8	8	4	4	4	0	3	7
P11747	TAF13	NP_013611.1		167	10	13	13	9	9	9	8	8	8	0	0	0	3	3	3	7	7	7	9	9	9	3	4	4
Q06680	YCG1	NP_010612.2;		1035	8	8	14	7	7	9	8	8	8	0	0	0	7	7	7	7	7	7	6	6	6	0	2	6
Q12027		NP_010105.1;		708	10	22	32	5	9	9	8	8	8	0	0	0	2	15	15	7	7	7	6	6	6	0	2	4
Q12194		NP_015259.1;	LPE4W	479	10	18	31	9	9	9	7	7	7	0	0	0	5	19	20	7	7	7	5	5	10	1	1	3
P52868	CWC23	NP_011387.2;	G2861	283	5	5	13	7	7	9	7	7	7	0	0	4	3	3	5	7	7	7	4	4	5	0	0	3
Q08962	NIP7	NP_015113.1;		181	6	16	26	9	9	9	6	6	6	0	0	0	2	2	2	7	7	7	6	6	6	1	2	4
P00817	IPP1	NP_009565.1	YBR0202	287	10	15	15	7	9	9	6	6	6	0	0	0	4	4	4	7	7	7	6	6	6	1	4	5
Q05636	RRP45	NP_010566.1;	D9954.1	305	10	13	25	9	9	9	5	5	5	0	0	0	4	4	4	7	7	7	9	9	9	1	2	4
P39958	GDI1	NP_011062.1;		451	10	11	14	6	6	9	5	5	5	0	0	0	5	5	5	7	7	7	7	7	7	0	0	3
Q05123	ARP9	NP_013747.1;	YM9973.07	467	9	18	41	4	4	9	3	3	4	0	0	3	3	3	4	7	7	7	6	6	6	0	0	0
P32803	EMP24	NP_011315.3;	G1271	203	1	1	3	4	4	9	0	0	0	0	0	0	2	2	6	7	7	7	5	5	5	1	1	2
P43577	GNA1	NP_116637.1;		159	7	16	30	5	9	9	7	7	7	0	0	0	4	4	4	6	6	6	4	4	4	0	1	3
P38882	UTP9	NP_012066.1;		575	3	9	16	9	9	9	6	6	6	0	0	0	6	6	6	6	6	6	8	13	13	0	0	2
Q06624	AOS1	NP_015506.1;	P9705.5	347	8	8	8	9	9	9	6	6	6	0	0	0	2	2	2	6	6	6	7	7	7	2	2	4
P50102	UBP8	NP_013950.1	YM9959.05	471	7	16	24	4	9	9	6	6	6	0	0	0	2	2	2	6	6	6	0	0	0	0	3	6
P53691	CPR6	NP_013317.1;	L8167.24	371	10	19	24	5	5	9	8	8	8	0	0	0	4	7	13	5	5	5	4	4	4	1	2	6
P40356	PGD1	NP_011490.2;		397	10	22	25	4	7	9	6	6	6	0	0	3	4	4	4	5	5	5	3	3	3	1	2	4
P25301	RAD57	NP_010287.1;	YD8119.10	460	9	12	12	5	9	9	5	5	5	0	0	0	4	4	4	5	5	5	3	3	3	1	2	2
P22137	CHC1	NP_011309.1;		1653	4	4	16	5	5	9	4	4	4	0	0	0	4	4	4	5	5	5	4	4	4	0	0	1
P22147	XRN1	NP_011342.1;	G1645	1528	3	3	6	4	4	9	4	4	4	0	0	2	2	2	13	5	5	5	3	3	9	1	1	1
Q08689	NAT5	NP_014896.3;		176	6	6	9	4	4	9	3	3	3	0	0	0	6	6	6	5	5	6	3	3	5	0	1	4
Q03799	MRPS8	NP_013879.1;	YM8520.07	155	3	9	9	5	5	9	3	3	3	0	0	0	3	3	6	5	5	5	0	0	4	1	2	4
Q04179	URH1	NP_010688.4;	D9509.19	340	10	12	12	3	3	9	2	2	2	0	0	0	3	9	25	5	5	5	4	4	4	1	1	1
P25348	MRPL32	NP_009929.1;	YCR041 YCR3W	183	4	4	4	4	4	9	2	2	2	0	0	1	3	4	15	5	5	5	3	3	3	1	2	4
P29056	BRF1	NP_011762.1;		596	8	16	16	5	9	9	2	2	2	0	0	0	5	5	5	5	5	5	2	2	2	1	2	2
Q04847	ROY1	NP_013985.1;	YM9920.12C	553	6	13	21	3	3	9	1	1	1	0	0	0	2	2	2	5	5	5	3	3	3	0	0	3
P53877	IPI3	NP_014217.1;	N1636	555	6	15	15	5	5	9	8	8	8	0	0	0	5	5	5	4	4	4	3	3	3	0	0	1
P39006	PSD1	NP_014230.1;	N1692	500	5	14	37	9	9	9	7	7	7	0	0	0	3	3	3	4	4	4	10	12	12	1	2	3
P33755	NPL4	NP_009729.1;	YBR1231	580	10	20	22	9	9	9	6	6	6	0	0	0	4	4	13	4	4	4	8	10	10	1	1	3
Q12406	ARP7	NP_015359.1;	YP9367.14	477	10	25	30	4	4	9	5	5	5	0	0	0	2	2	2	4	4	4	3	3	3	1	1	2
Q06707	SWC7	NP_013489.1;		132	3	6	23	4	6	9	2	2	2	0	0	0	4	4	4	4	4	4	3	3	3	0	0	3
Q02795	SWP1	NP_013869.1;	YM9375.19	286	2	2	26	3	3	9	0	0	0	0	0	0	1	1	1	4	4	4	0	0	1	1	1	3
P02557	TUB2	NP_116616.1;		457	9	14	14	5	5	9	6	6	6	0	0	0	4	4	15	3	3	3	0	0	0	0	0	1
P15790	CKA1	NP_012229.1;		372	10	25	50	4	4	9	5	5	5	0	0	0	1	1	1	3	3	3	0	0	0	1	2	5
P36018	YPT52	NP_012939.1	YK112	234	5	14	25	2	7	9	1	1	1	0	0	0	2	2	6	3	3	3	0	0	0	1	3	3
Q02574	MEC3	NP_013391.1	L8003.15	474	7	14	29	3	3	9	5	5	5	0	0	1	2	2	5	0	0	0	0	0	4	2	3	5
Q06090	MRPL51	NP_015425.1;	P8283.12	140	7	15	21	5	5	9	4	4	4	0	0	0	3	3	10	0	0	0	1	6	6	1	2	5
P47037	SMC3	NP_012461.1	J1049	1230	8	16	19	1	1	9	3	3	3	0	0	0	2	2	14	0	0	0	0	0	7	2	3	4
Q06512	NOC4	NP_015470.1		552	3	13	15	1	1	9	2	2	2	0	0	0	3	3	3	0	0	0	0	0	5	1	3	5
P28778	MRP17	NP_012923.3;		131	4	14	30	0	9	9	1	1	1	0	0	0	1	1	1	0	0	0	0	0	0	0	2	3
Q04226	TAF11	NP_013697.1;	YM9571.03C	346	10	17	19	8	8	8	10	10	10	10	13	13	7	12	12	10	11	11	10	15	15	0	1	3
P69851	DAD4	NP_710144.3;		72	7	7	7	8	8	8	7	7	7	4	4	4	2	2	2	9	9	9	5	5	5	0	1	2
Q08226	CRT10	NP_014578.1;		957	10	10	28	8	8	8	9	9	9	3	3	3	7	7	7	10	10	10	9	9	9	0	1	1
Q01519	COX12	NP_013139.1;		83	10	21	21	8	8	8	10	14	14	2	5	5	4	5	5	10	11	11	10	24	24	0	1	4
P25046	ROX3	NP_009459.1;	YBL0837	220	10	17	24	8	8	8	6	6	6	1	1	2	4	7	8	10	12	12	10	10	10	0	0	0
Q06168	SFH1	NP_013425.1;	L8543.4	426	8	8	13	6	6	8	8	8	8	1	7	24	3	7	7	8	8	8	7	7	7	0	0	2
P16522	CDC23	NP_012036.1;		626	10	15	16	8	8	8	7	7	7	1	1	1	5	5	5	8	8	14	7	7	7	1	2	4
P11412	ZWF1	NP_014158.1	N1110	505	10	21	31	8	8	8	6	6	6	1	1	1	3	3	3	8	8	8	6	6	6	2	4	6
P13712	MSI1	NP_009754.1;	YBR1405	422	10	23	23	8	8	8	8	8	8	0	0	0	3	3	11	10	11	11	10	12	13	1	1	5
P32461	DPH2	NP_012730.1;		534	10	21	28	8	8	8	8	8	8	0	0	0	5	5	11	10	16	16	10	12	12	0	1	1
Q08162	DIS3	NP_014621.1;	O2197	1001	10	25	49	8	8	8	8	8	8	0	0	0	3	3	3	10	14	14	5	5	5	1	2	3
P10964	RPA190	NP_014986.3;	O6276	1664	10	16	26	8	8	8	7	7	7	0	0	0	5	5	17	10	11	11	10	11	11	1	2	3
P25342	CDC10	NP_009928.1;	YCR022 YCR2C	322	10	16	16	8	8	8	7	7	7	0	0	0	5	5	5	10	10	10	10	10	17	0	0	3
Q12125	GET4	NP_014807.3	O3580	312	8	9	17	8	8	8	7	7	7	0	0	0	3	3	3	10	13	13	6	6	6	0	4	5
P32471	EFB1	NP_009398.1		206	8	8	8	8	8	8	6	6	6	0	0	0	4	4	4	10	17	17	7	7	7	1	3	4
P00937	TRP3	NP_012711.1;		484	10	15	15	8	8	8	5	5	5	0	0	0	4	4	4	10	10	10	10	11	11	0	1	2
P32386	YBT1	NP_013052.1;		1661	9	15	15	8	8	8	5	5	5	0	0	0	5	5	5	10	10	10	10	12	12	0	0	2
P22217	TRX1	NP_013144.1;		103	9	17	17	8	8	8	4	4	4	0	0	0	3	3	3	10	10	10	10	13	13	1	2	4
P53040	TAF6	NP_011403.1;	G2985	516	10	16	16	8	8	8	10	10	10	0	0	0	4	4	4	9	9	9	9	9	9	0	1	2
P20438	CLN2	NP_015067.1;		545	10	19	19	8	8	8	7	7	7	0	0	0	3	3	3	9	9	9	10	12	12	0	1	1
P40302	PRE5	NP_014045.1;	YM9924.06	234	10	18	26	8	8	8	7	7	7	0	0	0	7	11	11	9	9	9	10	10	10	0	0	2
P38931	SSN2	NP_010731.3		1420	10	12	12	8	8	8	6	6	6	0	0	0	5	5	5	9	9	9	7	7	7	0	3	5
Q99260	YPT6	NP_013363.1	L8479.11	215	10	23	23	8	8	8	5	5	5	0	0	0	5	5	5	9	9	9	8	8	8	2	4	5
Q05933	ARC18	NP_013474.3;	L8039.15	178	10	16	21	7	7	8	8	8	8	0	0	0	4	11	25	8	8	8	10	11	15	0	0	1
Q05672	RBS1	NP_010092.2;	D1266	457	10	22	27	6	6	8	8	8	8	0	0	0	6	6	6	8	8	8	10	12	12	0	1	1
P36068	SHE2	NP_012792.1		246	10	13	13	8	8	8	7	7	7	0	0	0	5	5	5	8	8	8	9	9	9	3	3	4
Q02939	TFB2	NP_015203.1;		513	5	5	5	8	8	8	7	7	7	0	0	0	4	4	4	8	8	8	6	6	6	1	1	2
Q08949	DDC1	NP_015130.1;		612	8	13	20	8	8	8	5	5	5	0	0	0	5	5	5	8	8	8	10	10	10	1	2	3
P32629	ANP1	NP_010878.1;	SYGP-ORF28	500	10	17	17	8	8	8	5	5	5	0	0	0	3	3	3	8	8	8	8	8	8	2	2	3
P36117	ALY1	NP_012946.3;		915	7	11	11	8	8	8	9	9	9	0	2	2	6	6	6	7	7	7	10	15	15	0	0	2
Q99181	HSH49	NP_014964.1;	O6142	213	10	17	24	8	8	8	6	6	6	0	0	0	8	11	11	7	7	7	10	10	10	0	1	4
Q12488	PSF1	NP_010296.3	PZA208 YD8119.18	208	6	14	20	6	6	8	6	6	6	0	0	0	4	4	4	7	7	7	7	7	7	1	3	5
Q03862	ARX1	NP_010386.1;	YD8557.10c	593	10	19	19	6	6	8	4	4	4	0	0	0	4	4	4	7	7	7	8	8	11	0	2	4
P29703	RAM2	NP_012906.3;		316	10	20	20	8	8	8	8	8	8	0	0	0	3	3	3	6	6	6	10	10	10	1	1	2
Q12330	SME1	NP_014802.3		94	10	11	11	8	8	8	7	7	7	0	0	0	3	3	3	6	6	6	10	11	11	3	3	5
P07246	ADH3	NP_013800.1;	YM9582.08	375	10	25	40	8	8	8	7	7	7	0	0	0	4	4	7	6	6	6	5	5	5	0	0	5
P53068	DOC1	NP_011274.2	HRC283	250	6	21	25	5	8	8	7	7	7	0	0	0	4	4	4	6	6	6	4	4	4	1	3	5
P27344	DPB3	NP_009837.1	YBR2015	201	10	25	25	8	8	8	6	6	6	0	0	0	4	4	4	6	6	6	9	9	9	2	6	6
P32563	VPH1	NP_014913.3;		840	2	2	10	8	8	8	6	6	6	0	0	0	0	0	0	6	6	6	5	5	5	1	1	2
P17214	EST1	NP_013334.1;	L8083.15	699	5	5	14	8	8	8	5	5	5	0	0	0	3	3	3	6	6	6	6	6	6	0	2	3
P33895	NUF2	NP_014572.1;		451	8	8	18	5	5	8	5	5	5	0	0	0	4	4	4	6	6	6	6	6	6	0	0	1
P38208	POP8	NP_009535.1	YBL0301	133	7	15	15	5	8	8	4	4	4	0	0	0	2	2	2	6	6	6	4	4	4	2	3	4
P13045	GAL3	NP_010292.1;	YD8119.14	520	10	17	17	6	8	8	8	8	8	0	0	0	7	9	9	5	5	5	7	7	7	0	1	2
P40005	GIM4	NP_010913.2		111	9	9	26	7	7	8	7	7	7	0	0	1	2	2	2	5	5	5	5	5	5	1	3	7
P05738	RPL9A	NP_011368.3		191	10	25	43	8	8	8	6	6	6	0	0	0	1	1	1	5	5	5	8	8	8	1	3	6
P51401	RPL9B	NP_014332.1	N2406 YNL2406W	191	10	24	42	8	8	8	6	6	6	0	0	0	1	1	1	5	5	5	8	8	8	1	3	6
P32585	SRB5	NP_011618.3;		307	5	7	9	5	5	8	5	5	5	0	0	1	4	9	34	5	5	5	10	13	13	0	0	1
P20133	BET2	NP_015502.1	P9705.12	325	10	16	16	7	8	8	5	5	5	0	0	0	4	4	4	5	5	5	6	6	6	2	4	4
Q06245	SEC10	NP_013267.1	L9362.12	871	9	16	32	5	5	8	5	5	5	0	0	9	4	4	6	5	5	5	5	5	21	1	4	6
P20424	SRP54	NP_015413.1;	P9513.14	541	4	15	16	4	8	8	5	5	5	0	0	0	2	2	2	5	5	5	3	3	3	1	1	2
P19524	MYO2	NP_014971.1;	O6167	1574	9	15	16	4	4	8	4	4	5	0	0	2	3	3	3	5	5	5	6	6	9	0	2	4
P14291	RED1	NP_013365.1	L8479.6	827	9	18	18	5	6	8	4	4	4	0	0	0	3	3	3	5	5	5	5	5	5	3	5	7
P50095	IMD3	NP_013536.3;	L9753.4	523	7	22	25	4	4	8	4	4	4	0	0	0	2	2	3	5	5	5	4	4	4	1	2	3
Q07527	TRM3	NP_010171.1;		1436	6	9	23	2	2	8	1	1	1	0	0	0	2	2	2	5	5	5	4	4	4	1	2	2
P32618		NP_010871.3;	SYGP-ORF14	956	2	2	21	4	4	8	1	1	1	0	0	0	4	4	4	5	5	5	3	3	3	0	1	5
P53982	IDP3	NP_014389.3	N2870	420	10	18	32	5	5	8	5	5	5	0	0	0	2	2	2	4	4	6	5	5	6	2	3	6
Q12483	SNF8	NP_015323.1		233	7	17	23	4	4	8	5	5	5	0	0	0	3	3	3	4	4	4	3	3	3	1	4	7
P12686	MRP13	NP_011598.3;		339	7	16	23	4	6	8	4	4	4	0	0	0	4	4	4	4	4	4	2	2	2	0	1	4
Q02793	SKI8	NP_011302.1;		397	3	11	11	4	4	8	4	4	4	0	0	0	4	4	16	4	4	5	0	0	1	1	2	4
Q03784	TRS23	NP_010532.3;	YD8419.13	219	3	12	12	1	4	8	4	4	4	0	0	0	3	3	3	4	4	4	0	0	0	1	1	2
P33767	WBP1	NP_010914.3;		430	4	8	16	2	2	8	1	1	1	0	0	0	3	3	3	4	4	4	3	3	3	0	0	1
Q04307	RPC11	NP_010330.1;	YD9609.01C	110	7	10	23	4	4	8	1	1	1	0	0	0	6	10	10	4	4	4	0	0	0	0	0	3
P32324	EFT1; EFT2	NP_010673.1;NP_014776.1;	O3317 YOR3317W;	842	8	8	20	5	5	8	5	5	5	0	0	0	2	2	2	3	3	3	0	0	0	0	1	3
P38989	SMC2	NP_116687.1;		1170	5	17	23	5	5	8	4	4	4	0	0	0	3	3	15	3	3	3	0	0	4	1	2	3
P38765	YHI9	NP_011894.1;		294	8	17	21	4	4	8	3	3	3	0	0	0	2	2	2	3	3	3	5	5	5	1	2	2
Q04368	CSI1	NP_013738.1;	YM9711.15	295	3	3	5	5	8	8	1	1	1	0	0	0	3	3	3	3	3	3	0	0	0	1	1	2
Q08749	TIM18	NP_014940.4;		192	10	22	38	3	3	8	1	1	1	0	0	0	3	3	3	3	3	3	0	0	0	1	1	3
P38932	VPS45	NP_011420.3;		577	5	15	30	3	8	8	1	1	1	0	0	0	3	3	3	3	3	3	0	0	0	0	2	4
P00856	ATP8	NP_009312.1;YP_009144707.1;		48	3	3	8	4	4	8	0	0	0	0	0	0	2	2	4	3	3	7	3	3	3	0	0	1
Q04924	GTB1	NP_010507.3;		702	2	2	2	3	6	8	0	0	0	0	0	0	2	2	2	3	3	3	3	3	3	0	0	2
P53125	ITC1	NP_011382.1	G2842	1264	10	18	18	5	8	8	3	3	3	0	0	0	1	9	9	2	2	2	4	4	4	2	3	3
P40509	SEC28	NP_012189.2;		296	8	10	13	5	5	8	3	3	3	0	0	0	3	3	3	2	2	2	0	0	6	1	2	5
P38888	MNL1	NP_012074.3;		796	1	1	1	0	0	8	0	0	0	0	0	0	0	0	0	1	1	1	0	0	0	0	0	4
P22139	RPB10	NP_014853.3;		70	10	16	32	0	0	8	2	2	2	0	0	0	2	2	2	0	0	0	0	0	0	0	2	3
P25349	YCP4	NP_009930.1	YCR042 YCR4C	247	4	9	28	2	3	8	1	1	5	0	0	2	3	3	3	0	0	0	0	0	0	1	3	5
P36015	YKT6	NP_012725.1;		200	7	14	15	0	7	8	1	1	1	0	0	0	1	1	1	0	0	0	0	0	0	0	2	2
P36520	MRPL10	NP_014115.1;	N0580	322	10	18	18	7	7	7	7	7	7	3	3	3	2	2	2	10	10	10	10	12	12	1	2	3
P37898	AAP1	NP_011913.1;		856	10	21	21	7	7	7	7	7	7	1	1	1	4	4	4	8	8	8	9	9	9	0	0	1
P50947	PHO23	NP_014302.3;	N2205	330	10	12	16	7	7	7	7	7	7	0	0	0	7	8	8	10	11	11	6	6	6	0	0	1
P21242	PRE10	NP_015007.1;	O6650	288	10	18	28	7	7	7	6	6	6	0	0	0	6	14	15	10	16	16	10	18	18	0	0	2
P36421	TYS1	NP_011701.3;	G7522	394	10	14	20	7	7	7	6	6	6	0	0	0	7	7	13	10	10	10	10	10	15	0	1	4
P25374	NFS1	NP_009912.2;		497	10	21	21	7	7	7	6	6	6	0	0	1	4	4	11	10	10	10	8	8	27	1	1	2
P06780	RHO1	NP_015491.1;	P9325.3	209	10	20	20	7	7	7	5	5	5	0	0	0	4	4	4	10	10	10	9	9	9	0	2	3
P23641	MIR1	NP_012611.1;	J1837	311	10	11	11	7	7	7	4	4	4	0	0	0	5	5	11	10	11	11	10	12	15	0	1	2
P38286	IFA38	NP_009717.1;	YBR1209	347	3	3	3	7	7	7	4	4	4	0	0	0	1	1	1	10	10	10	9	9	9	0	0	1
P38149	DUG2	NP_009840.3;	YBR2018	878	3	3	12	7	7	7	4	4	4	0	0	0	3	3	3	10	10	10	5	5	5	0	0	3
Q06510	TAZ1	NP_015466.1;		381	8	19	19	7	7	7	4	4	4	0	0	0	4	4	4	10	11	11	4	4	4	0	0	2
Q06010	STE23	NP_013493.2;	L8084.12	1027	3	15	28	7	7	7	3	3	3	0	0	0	6	6	11	10	10	10	10	10	10	0	1	2
P25649	AHC2	NP_010005.1	YCR82W	128	9	21	21	7	7	7	9	9	9	0	0	0	5	5	5	9	9	9	7	7	7	1	3	4
P53914	KRE33	NP_014267.1	N1216 N1858	1056	10	23	31	7	7	7	8	8	8	0	0	0	2	2	2	9	9	9	10	10	10	2	3	4
P25451	PUP3	NP_011020.3;		205	8	8	8	7	7	7	7	7	7	0	0	0	9	9	9	9	9	9	9	9	9	0	1	3
P49956	CTF18	NP_013795.1;	YM9582.03C	741	10	19	24	5	5	7	7	9	13	0	4	10	6	21	25	9	9	9	5	11	12	0	0	0
P53598	LSC1	NP_014785.3	YOR3352W	329	9	23	33	7	7	7	6	6	6	0	0	0	5	5	5	9	9	9	7	7	13	1	3	7
P53276	UTP8	NP_011644.3;		713	8	8	14	7	7	7	6	6	6	0	0	0	4	4	12	9	9	9	6	6	6	0	1	1
P32604	FBP26	NP_012380.1;	J0575	452	10	18	23	7	7	7	5	5	5	0	0	0	8	8	8	9	9	9	10	10	10	0	2	5
P32462	ERG24	NP_014119.1;	N0593	438	7	7	7	7	7	7	5	5	5	0	0	0	6	6	6	9	9	9	6	6	6	0	0	1
P33759	MRPS5	NP_009810.3;	YBR1704	307	9	9	22	7	7	7	4	4	4	0	0	1	3	3	3	9	22	22	7	7	7	1	1	4
P53141	MLC1	NP_011409.1	G3080	149	9	21	21	7	7	7	5	5	5	0	0	0	4	4	4	8	8	8	8	8	8	1	4	4
Q07979	RSC58	NP_013133.1;		502	9	9	21	7	7	7	5	5	5	0	0	0	5	5	5	8	8	8	8	8	8	1	1	5
P32773	TOA1	NP_014837.1;		286	10	11	22	7	7	7	5	5	5	0	2	9	3	3	3	8	8	8	7	7	7	0	0	4
Q04969	SPC2	NP_013657.1;	YM9958.07	178	7	9	9	7	7	7	5	5	5	0	0	0	4	4	4	8	8	8	6	6	6	1	1	2
P40084	RTR1	NP_011066.3;		226	9	19	19	6	6	7	5	5	5	0	0	0	4	4	4	8	8	8	5	5	5	1	2	5
P17442	PHO81	NP_011749.3	G8567	1178	4	4	12	5	5	7	3	3	3	0	0	0	1	1	1	8	8	8	3	3	3	2	3	7
P33420	NIP100	NP_015151.1;		868	10	19	20	7	7	7	8	8	8	0	0	0	5	5	8	7	7	7	10	11	12	0	1	5
Q12024	YTM1	NP_014915.3		460	9	24	30	7	7	7	8	8	8	0	0	0	3	3	3	7	7	7	6	6	6	2	3	5
Q12455	SPE4	NP_013247.1;	L9634.5	300	10	17	17	7	7	7	7	7	7	0	0	0	4	4	4	7	7	7	9	9	9	1	2	2
P46654	RPS0B	NP_013149.1;	L2118	252	9	9	14	7	7	7	7	7	7	0	0	0	6	6	6	7	7	7	6	6	6	0	0	0
P32905	RPS0A	NP_011730.1;		252	9	9	14	7	7	7	7	7	7	0	0	0	6	6	6	7	7	7	6	6	6	0	0	0
P25604	STP22	NP_009919.3;	YCL8C	385	10	10	10	7	7	7	6	6	6	0	0	0	6	6	6	7	7	7	10	10	10	1	2	2
P24482	DPB2	NP_015501.2;	P9705.7	689	10	18	18	5	5	7	6	6	6	0	0	0	5	5	5	7	7	7	10	12	12	1	1	3
P32357	AAR2	NP_009479.1;	YBL06.06 YBL0611	355	10	13	13	5	5	7	6	6	6	0	0	0	7	7	10	7	7	7	7	7	7	0	1	2
Q04868	ELP6	NP_014043.1;	YM9924.04	273	9	9	9	7	7	7	6	6	6	0	0	0	3	3	3	7	7	7	6	6	8	0	0	0
[truncated: 326 more rows]
